# Supplementary material for: Rules of Coexistence: RiPP Recognition Elements Evolved to Prevent Pathway Interference through Leader Peptide Discrimination
Source: Research Square preprint supplement (doi:10.21203/rs.3.rs-7990798/v1), 2025-11-13
Supplement: Supplementary file 1 [file 2508be2c386411ab8c86fb44.xlsx]

## Sheet: dataset
SSN cluster #	Description	domain	phylum	order	family	genus	SpI ID	SpI Sequence	Sequence Length	RRE counts	RRE IDs	RRE others count	RRE others ID	RRE others Sequence	LPP RRE counts	LPP RRE ID	LPP RRE anywhere in the genome counts, ND - not determined	LPP RRE elswere in the genome	LPP RRE Sequence	LPP precursor	LPP precursor elswhere in the genome, ND - not determined	LPP PRecursor ID, NA - not annotated	LPP Precursor Sequence	Lasso peptide RRE	Lasso peptide RRE ID	Lasso peptide RRE Sequence	Macrolactame cyclase ID	Lasso leader peptidase IDs	Lasso peptide BGC anywhere in the genome	ID of Lasso peptide RRE elswhere in the genome	ID of Macrolactam synthase elsewhere in the genome
1	WP_113034598.1 signal peptidase I [Paenibacillus contaminans]	Bacteria	Bacillota	Bacillales	Paenibacillaceae	Paenibacillus	WP_113034598.1	MPARARAIETQLLSQHLRKQGFLEIASVGDSMYPLIREGDLCRFEPVVPDTVRKGDVLLFVTKDGHLVGHRYLSQYSKQGENYYVCKGDTNKFPDEPIRSQQIIGKLTLIRTAPRRMIRMEGLLPRMWGVLTVRVPRMWRLLRLVLAYKRWRPAKRRASDNRAGR	165	1	WP_113034599.1	0			1	WP_113034599.1	0		MNMNTTTMYKRTMQMEAVAVGEEWIVMNTAKLTVTKMNEVGGFIWAELKEDGDVMSLARKLQERYDISEEIALQDVKLFLAELEIAELIEHAG*	1		NA	MTKKPYAPPSVLSHQKVSFETKASGNDNGGGDGGGPGGNFWS*	0					No
1	WP_051395626.1 hypothetical protein [Bacillus sp. FJAT-14578]	Bacteria	Bacillota	Bacillales	Bacillaceae	Bacillus	WP_051395626.1	MYPLIKQGDICRFVPLDSKSSLKKGEIILFACEDGRLIGHRYYGSFMEKGVSYYLFKGDTNVRYDPPVEKSCLIGKLTFIKKEKVNIRSDSMISQLWGTVVISLPALPRYCKRYMNFKSRLRI	123	1	WP_028398021.1	0			1	WP_028398021.1	1		MSTTYECIQNIDMVEIDDEWIIMDTDHFKVTKVNAMGAYILERVREQKGIEEIIETIAADYSVDANTVRSDVLAFIEELKGIGLIKDERTASPHQ*	1		WP_028398023.1	MKSAVRNAAKTYTRPMVLSSQPIRFETSQCWNKGHGPVSGDPGKSDGDKYPHEPYDPKKEHPKK*	0					No
1	WP_077614651.1 hypothetical protein [Caenibacillus caldisaponilyticus]	Bacteria	Bacillota	Bacillales	Sporolactobacillaceae	Caenibacillus	WP_077614651.1	MELYGISEKRRGSSMSHARFRFYNRVRPVGLSFSWRRGSADRQWDGRKRLLDSDRYGGISGDGQAPKTGRYGHETTRTLHPNRTKAAAEASIGDEAKSFGSLLRRVIAEKGSVEIPSNGVSMFPLIREGDRCVFGPIDPERIKKGDIYLFESEDGVLHAHRLSNIFHLLDDTILMFRGDARLTADKPVRLPDLIGKLVRIQKKRIVLSADGWPARLWGRLALHGSLANRLLTVYLFYKERKGAARGKRRNVKTFKRRE	258	0		0			0		0			0				0					No
1	WP_042234937.1 peptidase S24 [Paenibacillus chitinolyticus]	Bacteria	Bacillota	Bacillales	Paenibacillaceae	Paenibacillus	WP_042234937.1	MGGEAHSRLGSGGFGAEALVVRRALELKGRVEIPSRGTSMRPLIREGSVCAFVPVAAADLRRGDIVLFEGEEGGLIAHRLIRRGEEGPQAPLLCKGDANIGFDPLVPAAKVLARLETISRDGRVSSRLSPGFRIWGRIMTAFPALSRGFRLASRVARRLRGQRN	164	0		0			0		1	WP_042229856.1	MEKKFRRHQDTEVMLLDGEYVIMQMNRQSITRVNEVGGMIWSLLSETRTVHELVLCLQDHYETTYQTAENDIHLFLQQLEEYDLVEIMEVVEKESAPLPYRSAVT*	0	1	WP_042229856.1	MKKAYIAPTVLKHQQIVFETKPSKPHPCDNGGHTGSPNCK*	0					No
1	WP_120190644.1 hypothetical protein [Ammoniphilus oxalaticus]	Bacteria	Bacillota	Bacillales	Paenibacillaceae	Ammoniphilus	WP_120190644.1	MSNVNPLGSSIKSILAKKGWVDIPASGVSMFPLIKEGDICRFVPLSAELDLKKGDVYLFQTEDGQLIGHRYYHSFLKNQILFHAFKGDSNVQFDPPLSPEQLIGKLISIKKKRSVLKTGGRVTRIWTRFILSFPTVPVYCKKGFYYWRRLKEIASRKGQSNGSH	164	1	WP_120190645.1	0			1	WP_120190645.1	0		MPAVNYRGTRAPIVFSKKQPILGVDFMNHIELIEMDGEWVVMDTEGFTITKINRMGAYIVEALLAHKTIEQIIEMITRQFQADSEKIRYETIGFIQQLEKIGLVHEQR*	0				0					Yes	WP_120190676.1	WP_120190673.1
1	WP_114345245.1 hypothetical protein [Bacillus sp. NFR08]	Bacteria	Bacillota	Bacillales	Bacillaceae	Bacillus	WP_114345245.1	MQANQEIVALIQSTINKKGWIDLPAIGKSMFPYIYEGDICRFIKKKPNLLKTGEIVLFYNSNGQLVAHRLHKTFINQGEQSFLFKGDSNLGFDELVNESQIIGKLEYIHGRIKLNGKIFSKLYCHLVLNYPILSRLFRIYLDKIKIS	147	2	WP_114345247.1; WP_114345259.1	0			1	WP_114345247.1	0		MNKYIRNKQFDITTNFDNEWIILNTDKFTVTKINDIGGFCWSLLQQPQSVHTLTQAVKQEYKEVDGTVEEDIHHFLSELLTLNLIDYAS*	1		WP_114345251.1	MNSTNNDPKVYHRPTVLDHQQVRFETAQSWNPGKGELEHPGHGNGGTNFPPGNPNTTPGGAGTPGKGHGNGKP*	1	WP_114345259.1	MSKTSKISLKSQVVQNEGNIVSDMDGEKVMLNVQNGKYYNLGEIGGVVWNYIEEPITITELVTALISEYEIEEGECEKQVVSFLDHLLSEKLISILDDSSY*	WP_114345253.1	WP_114345261.1	Yes
1	WP_103996497.1 peptidase S24 [Paenibacillus sp. UNC499MF]	Bacteria	Bacillota	Bacillales	Paenibacillaceae	Paenibacillus	WP_103996497.1	MDRGAYRRSGSGGLGAEALVVRRALELKGRVEIPSRGTSMLPLIREGSVCTFVPVAAADLRRGDIVLFEGEEGGLIAHRLIRRGGAGAQAPLLCKGDANIGFDPPVPAAKVLARLETVNRDGRVSSRLSPGFRIWGRIMTAFPALSRAFRLASRYARRLRGQGN	164	0		0				0	1	WP_103994299.1	MEKRYHRHADTEIWETEGDFLIVHTLHQSITKLNEVGGYIWSLLDAPKTLEELVMELTKEYEITMDQGLNDVNVFLHDLSQYGLITTCTESLEVANN*	0	1	NA	MVKKTYIAPTVLKHQQIVFETKPSKPHPCDNGGHTGSPTCR*	0					No
1	WP_113022977.1 peptidase S24 [Paenibacillus sp. YN15]	Bacteria	Bacillota	Bacillales	Paenibacillaceae	Paenibacillus	WP_113022977.1	MQAEAAVLVRLIREKGELELPASGTSMRPLIREGDRCRFVPLTKAPRLGDILLVAEAGGRLVGHRLIRIAGAGEEALYICKGDSNVNPDAPAAAGQIIGKLADIRRGRATLRADQGLARWWGRLLVRWPGLSRVVRGYLRAERRLGRMRRGKERGAL	157	1	WP_113022978.1	0			1	WP_113022978.1	0		MATYIRATDSEAVELDQEWIILHPDQFTVTKINEVGGVCWGLLKEPQTVSSLAGHIARQYEIDSEEAEGDIEAFLLHMEQIGMIRHAG*	1		NA	MKLNYVKPAVLEHTSISFETAVSSCNPPSVPVSAPGIGDICVNPDQTWDPYNP*	0					No
1	WP_128658953.1 signal peptidase I [Paenibacillus sp. 598K]	Bacteria	Bacillota	Bacillales	Paenibacillaceae	Paenibacillus	WP_128658953.1	MQADLEAIRMVKHRVDHRGYIDLPSSGQSMYPLIRQGDLCRFVRCERQELAPGDIILFRSREGRLVGHRYLYTSRQGEESWLVCKGDSNVRHDAPIPYREVIGKLLWIKSARRMTLSTHYRARLLGRTFTRFPGCSRYVALYLRWKAKIL	150	1	WP_128658982.1	0			1	WP_128658982.1	0		MTQYVWSEDCSEAVEMDDAWVILHPGQFTVTKVNETGGLCWNLLREPSSPDTLTAALLSSYAITAEEAQADVEAFLSQMREIGLIRDAG*	1		NA	MKPYVKPSVLTHSKVKFETVISNCVPPSFPGQYPGGNICVHEDGSWTPLP*	0					Yes	WP_128658255.1	WP_128658253.1
1	WP_121610083.1 signal peptidase I [Bacillus foraminis]	Bacteria	Bacillota	Bacillales	Bacillaceae	Mesobacillus	WP_121610083.1	MLFDQATVGLFKNTIQKDGYIILPSMGNSMYPLIREGNLCRFVSCQPGELKKGDVILYYSKTGQIIAHRFIEMKSMNDMNYYYLKGDTNLGFDSPIKEHQIIGKLVSIQKGDRNVHSGGLALDLWGKLVIAIPALSGILRKYLNWKTHFQF	151	1	WP_121610084.1	0			1	WP_121610084.1	0		MVQYIQVNDYETAEFDGEWVVLNTDNFTVTKLNEIGGFCWSMMKEAQTVDSLCQAIEQEFGRASDNLSGDIEAFLSDLMQYELIQHAV*	1		WP_121610086.1	MRAKSEETDNFPLVLSHQPIRFETAHSWNKGVGNKNPNSDGNGGENYKNEPRDGKPGSGPPPVTPWQPHK*	0					Yes	WP_121610111.1	WP_121610113.1
1	WP_083938060.1 signal peptidase I [Paenibacillus daejeonensis]	Bacteria	Bacillota	Bacillales	Paenibacillaceae	Paenibacillus	WP_083938060.1	MPSQQRKPMRMCNHFWSKWNTLVWSGMQVDKETIQIVKLTVEKHGFIDLPSSGQSMFPLIRTGDLCRFVRCDRNELVPGDILLFRSREGALVGHRYLHKRKQGDEHVLICKGDSNLTCDAPVPYREIIGKLLWIKKPQRLILSTHYRARVLGKALIRFPNWSRYIAMYLRWKKTL	175	1	WP_083938059.1	0			1	WP_083938059.1	0		MSPFSYGSTCVRIVFSKKRYILGGNLLMKHYVWNEACNEAVEMDDAWVILNPATFTVTKLNEAGGLCWNMLREPCSPETLAEALRTSYAISAEEANADVQSFLEQMEHIGLVRHAG*	1		NA	MKPYVKPSVLTHSQVKFETVISNCVPPSFPGQYPGGNICVHPDGSWSPLP*	0					No
1	WP_014653103.1 hypothetical protein [Paenibacillus mucilaginosus]	Bacteria	Bacillota	Bacillales	Paenibacillaceae	Paenibacillus	WP_014653103.1	MRRADPAVLSMLGRLTAAGREIELPSRGDSMFPLIREGSRCTISPVRPCDLRPGDIVLFRGAGGELIGHRYYGRNEAGLLLFRGDANVRFDAPVPDEALLGRLTAIRRGGSLYRPDEGLCRLWGRWVMSLRWIPTLMRRMLRTKEALRRRVTPG	154	1	WP_014372684.1	0			1	WP_014372684.1	0		MSSLLQSTYKCAPHLEGMEMDGEFLIMDSSSLRVTKLNPMGGRIWTLIGEGLPLETVVERIEAEYDAGGADVRGDVERFVEGLLGAGLIERAAG*	1		NA	MNKQPYTAPQIMEQQDITFETVPSHVCDGPAGDKNPHCD*	0					No
1	WP_098445242.1 hypothetical protein [Bacillus sp. es.036]	Bacteria	Bacillota	Bacillales	Bacillaceae	Bacillus	WP_098445242.1	MSQLQMLKKLIETNDYLEIPSHGLSMFPIITQKNICVFEKFNLQNISKGDILLFGTKDGGITGHRYLRTIKYDQKLWLVCKGDTNLYPDEPVLENQVIGKLTMIKKKDRVIDVTRRTMKIYSYLICHFRLIPALLHAYVHKILKKRNGKANEESSAS	157	1	WP_098445243.1	0			1	WP_098445243.1	0		METYIRQADLEAIEMEGSWVILNPNDYTVTKLNALGSVCWELLTKEQSVQSLTEQIQKDFEVSSEIVQNDITQFLGELMDAGLITK*	1		NA	MNMNKRFLHKRRWKLMKKVYEAPQVLAHQMIQFETTASGKKDKDKDKDDKKKGF*	0					No
1	PFG15025.1 signal peptidase endoplasmic reticulum-type [Bacillus sp. es.036]	Bacteria	Bacillota	Bacillales	Bacillaceae	Bacillus	PFG15025.1	MLKKLIETNDYLEIPSHGLSMFPIITQKNICVFEKFNLQNISKGDILLFGTKDGGITGHRYLRTIKYDQKLWLVCKGDTNLYPDEPVLENQVIGKLTMIKKKDRVIDVTRRTMKIYSYLICHFRLIPALLHAYVHKILKKRNGKANEESSAS	152	1	PFG15026.1	0			1	PFG15026.1	0		METYIRQADLEAIEMEGSWVILNPNDYTVTKLNALGSVCWELLTKEQSVQSLTEQIQKDFEVSSEIVQNDITQFLGELMDAGLITK*	1		NA	MKKVYEAPQVLAHQMIQFETTASGKKDKDKDKDDKKKGF*	0					No
1	WP_095299855.1 S26 family signal peptidase [Bacillus sp. 7586-K]	Bacteria	Bacillota	Bacillales	Bacillaceae	Bacillus	WP_095299855.1	MQFNQDTIDLLLRTIKTYGWMDLPASSMSMYPFIKEGNICRYTKFDLKTVKRGDILLYYTSSGQLLTHRLLYIDKANPKYVFLKGDLNSKSIGPIEINQIIGKLITIDKKKKKVYSNDLKAILWGYFITKFPFLSNIIKIYIRFKNKFRKRLSSI	155	1	WP_095299851.1	0			0		0			0				1	WP_095299851.1	MGDIFEGPFYIKQKEGNIVSDMDGEKVMLSISNGKYYNLGKIGGVIWDLIEKPISYLELVDSLVNNYDVDRGECEQQVLSFLESLKKEELIEIKEGSIM*	WP_095299849.1	WP_095299927.1	Yes
1	WP_068777003.1 peptidase S24 [Paenibacillus sp. FJAT-26967]	Bacteria	Bacillota	Bacillales	Paenibacillaceae	Paenibacillus	WP_068777003.1	MESELELHVIRRSLEQRGRVEIPSRGTSMLPLIREGSVCTFEPAGPDEVQRGDIVLFEAADGGLIAHRLIRRTGTGSGAVFYCKGDANTGFDPPVAAGNLLARLVQIRRGSREISGGMLRFKLWGRVMTALPGLARVIRLAARLSKQK	148	0		0			0		0			0				0					No
1	AFC33883.1 hypothetical protein PM3016_7309 [Paenibacillus mucilaginosus 3016]	Bacteria	Bacillota	Bacillales	Paenibacillaceae	Paenibacillus	AFC33883.1	MLGRLTAAGREIELPSRGDSMFPLIREGSRCTFSPVRPCDLRPGDIVLFRGAGGELIGHRYYGRNEAGLLLFRGDANVRFDAPVPDEALLGRLTAIRRGGSLYRPDEGLCRLWGRWVMSLRWIPTLMRRMLRTKEALRRRVTPG	144	1	AFC33884.1	0			1	AFC33884.1	0		MSSLLQSTYKCAPHLEGMEMDGEFLIMDSSSLRVTKLNPMGGRIWTLIGEGLPLETVVERIEAEYDAGGADVRGDVERFVEGLLGAGLIERAAG*	1		NA	MNKQPYTAPQIMEQQDITFETVPSHVCDGPAGDKNPHCD*	0					No
1	WP_051865283.1 hypothetical protein [Bacillus indicus]	Bacteria	Bacillota	Bacillales	Bacillaceae	Metabacillus	WP_051865283.1	MQVNETTIVLLKRTIENQGWIELPSEGYSMYPFIRRGDVCRFGAFETVRKGEILLFHTAEGRLVAHRYYKKKKDHYFLKGDTNECMDSPVQKGHIIGKLIAIKKKKMIVHMNQFFPKSYGYAVSSTHLTARFFRFLLRRKLGDGSYV	147	2	WP_029280923.1; WP_029280915.1	0			1	WP_029280923.1	0		MTITYKQTPDCETVEVDGEWIILHTENFTVTKLNESGGLCWSLLKEETSADVLLESIRTLSAHYTETDIQLFLDELTSCGLIEHASQ*	1		WP_029280925.1	MSTSNRPMVVSHQPIVFETAQSWNKGHGNLNHPGTGNGGVNYPNPPYTGPHNGGNGGGNGKGKGKGK*	1	WP_029280915.1	MINTMKINMSSQVKQKEGNIVSRMNDEIVMMNIDKGNYYNLGTVGGEIWNKIEHECNVSEVVSHLTSIYEITKKKCEVEVIVFLNKLYNEDLVEIIKH*	WP_029280913.1	WP_051827190.1	Yes
1	WP_056608895.1 hypothetical protein [Paenibacillus sp. Soil750]	Bacteria	Bacillota	Bacillales	Paenibacillaceae	Paenibacillus	WP_056608895.1	MQFPKEYRQLIVQTMDKNGWIELPAQGTSMYPFIQMGDICRFVPAQADHIKKGDVVLFFTRYGSLVAHRLIRKAWLEQGIILHCKGDTNLACDEGIDQELLIGRMDWIQRNERIIHVDGWAAQAWGYIVLGVPPISLVLNHYLARRKRIQG	151	2	WP_056608893.1; WP_056608908.1	0			1	WP_056608893.1	0		MSQYLRMNDYESIELDMEWIILNTDEYTLTKLNGVGGFCWSLLGVAQTVSSISEAVRKEYVLVDEPVEADIEAFLQDMIRRGLVQHAIS*	1		WP_056608890.1	MENETAMKPRRYSRPRVLSQQPVRFETAQSWNKGQGNTNHNGNGNGGIHYPNPPYSGPHHNGKH*	1	WP_056608908.1	MIKQATMTISDIVEQGKGNIVSNMGEDKVMLNVQHNKYYNLGEVGGRIWELIASPVVVADVILTLISEYQVDKEQCEEHVIGFLEHLLKEELIHVREK*	WP_056608902.1	WP_056609595.1	Yes
1	WP_009676886.1 MULTISPECIES: peptidase S24 [Paenibacillus]	Bacteria	Bacillota	Bacillales	Paenibacillaceae	Paenibacillus	WP_009676886.1	MGGEVHSRLGSEGLGAEALVVRRALELKGRVEIPSRGTSMRPLIREGSVCTFVQASAADLRRGDIVLFQGEEGGLIAHRLIRRGGEGPQAPLLCKGDANIGFDPPVPAAKVLARLETISREGRVSSRLSPGFRIWGRIMTAFPVLSRGFRLASRVAGRLRGQKN	164	0		0			0		0			0				0					No
1	WP_108674686.1 signal peptidase I [Bacillus megaterium]	Bacteria	Bacillota	Bacillales	Bacillaceae	Priestia	WP_108674686.1	MIAALLNSMQADDKQGHILKALIDRNGLLELPAEGTSMYPLIKRGDICRFTSIKHSPLKRGDIVLFESPANKLIAHRLLNCSYVQEEECYIFKGDTNYGVDDLVTQEKIIGKLVVIQKKSVTIQEKNVAAVLWGKLILAFPLLSVLLRRYINYQEWKKAD	160	2	WP_108674685.1; WP_048021072.1	0			1	WP_108674685.1	0		MTSYIQKGGYEVMEVDSEWVILNPQAYTVTTLNEVGGYCWKVIENKKTLAEIIKAVAAYYNTEAELIKGDIQHFLNKLIDCGLVEQYAS*	1		WP_098626850.1	MQEKTYSAPEVLNHQPIRFETAQSWNPGKGNLDHPGKGNNGSNWPSTNPNPTPGGAGAPGKGKGKNK*	1	WP_048021072.1	MIKNQDISMNQLVSQETGHIVSDMDGEKVMLSISNGKYYNLGEIGGEIWEKIKEPISVSELISTLVTQYNVEQSDCEEQVIAFLSGLIKEGLIQVAENNRS*	WP_108674681.1	WP_048021070.1	Yes
1	WP_129378445.1 hypothetical protein [Paenibacillaceae bacterium]	Bacteria	Bacillota	Bacillales	Paenibacillaceae		WP_129378445.1	MPASAESIHVIARTLNQQGYIDIPAKGKSMYPFIRSGDVCRFEPFVEQDLSRGDILLFIAPGQLLIGHRYLRSTQKHGIRHFVCKGDSNIHPDLPLIGEQILGKLRWIRTGQRTIQMGSGLARLWGEAISGLPWLSYVIQWYLRLKRKMRRLRLS	155	1	WP_129378444.1	0			1	WP_129378444.1	0		MAAYICSIETDAIEFDQEWVILHPDQFTVTKLNESGGLCWSLLKTEQPAERLISELQHQYNITEDEARQDVAEFLEQMITIGLVRHAS*	1		NA	MIKQAYSKPAILLHQSIAFETFFSSCNCGGTDYECFERDGKHICVPRTRP*	0					No
1	WP_013921423.1 hypothetical protein [Paenibacillus mucilaginosus]	Bacteria	Bacillota	Bacillales	Paenibacillaceae	Paenibacillus	WP_013921423.1	MRRADPAVLSMLGRLTAAGREIELPSRGDSMFPLIREGSRCTFSPVRPCDLRPGDIVLFRGAGGELIGHRYYGRNEAGLLLFRGDANVRFDAPVPDEALLGRLTAIRRGGSLYRPDEGLCRLWGRWVMSLRWIPTLMRRMLRTKEALRRRVTPG	154	1	WP_014372684.1	0			1	WP_014372684.1	0		MSSLLQSTYKCAPHLEGMEMDGEFLIMDSSSLRVTKLNPMGGRIWTLIGEGLPLETVVERIEAEYDAGGADVRGDVERFVEGLLGAGLIERAAG*	1		NA	MNKQPYTAPQIMEQQDITFETVPSHVCDGPAGDKNPHCD*	0					No
1	WP_098118859.1 hypothetical protein [Bacillus sp. AFS002410]	Bacteria	Bacillota	Bacillales	Bacillaceae	Bacillus	WP_098118859.1	MQANQEIVFLIKSTINKKGWIDLPAIGKSMFPYIQEGDICRFIDKKPNFLKTGEVALFYNRNGQLVAHRLHKTFIYHDEQSFLFKGDSNLGFDELVSESQIIGKLEYINGRIKPTENLFSKLYCHLVLNYPILSRLFRIYLDKIKIS	147	2	WP_098118858.1; WP_098118853.1	0			1	WP_098118858.1	0		MDKYIRNEQYDVTTNFDNEWIILNTDRFTVTKINDIGGFCWTLLKQPQSVHTLTQAIKQEYVEVNESIEKDIHHFLSELLTLNLINYAS*	1		WP_098118856.1	MRSSTNNAPKVYNRPTILDHQQVRFETAQSWNPGKGNQDHPGTGNDGSNFPPGNPNTTPGGAGTPGKGNGQPNP*	1	WP_098118853.1	MIKTSKISLNCQVIQNEGNIVSDMDGETVMLNVQNGKYYNLGELGGVIWSYLEESIKVSEVVTALISEYEIEQKECEEHLVTFLNQLLSEKLISSLDESSC*	WP_098118855.1	WP_098118852.1	Yes
1	WP_091167130.1 hypothetical protein [Paenibacillus sp. 1_12]	Bacteria	Bacillota	Bacillales	Paenibacillaceae	Paenibacillus	WP_091167130.1	MIAEDGTITNGDFLCMGASGETTKIISLAIRKHGRLDLTAHGNSMFPFIREGDVCRFVSFDSLLLKKGDIAVFYSLDGNIIAHRLCQFKLINNELCYVFKGDTSIGYDEPVRKKQIIGKLIWIRKGTMIYRAEGWAPQLWGRLILTLPVLSLLLRTYLKGKANT	164	1	WP_091167135.1	0			0		0			0				1	WP_091167135.1	MIKQQTISLNDTVVQGKGYIVSSMGGEKVMLSINNGKYYNLGKIGGSIWDHIEKQITVNELIAVLMSEYEVKQPECEKQVISFLEVLLANDLILVGEAISI*	WP_091167132.1	WP_091167137.1	Yes
1	WP_057915887.1 hypothetical protein [Bacillus muralis]	Bacteria	Bacillota	Bacillales	Bacillaceae	Peribacillus	WP_057915887.1	MYPFIKNGEVCNFTVCLPSYLKKGDIVLFYASSSRLIAHRYYKELKDDGKRRYLFKGDTNVCFDEPIYPEQIVGKLVYVQKRNYKLLVTGFLAKAWAGSILHFPYLSDMLRTYLHIQQREKGRRSQ	126	1	WP_057915886.1	0			1	WP_057915886.1	0		MVQYIQCSTVEATQLDEEWIILHTENFTVTKLNEIGGFCWGLLNQAQTVDSLVQSLSDQYVAMEEISTRDIESYLLGLLHFRLIQHVI*	0				0					No
1	WP_090796759.1 hypothetical protein [Paenibacillus sp. GP183]	Bacteria	Bacillota	Bacillales	Paenibacillaceae	Paenibacillus	WP_090796759.1	MKANLEMIRGFKQIIANRGYLEIPSHGLSMFPLLQTGTICRFVAFDPDRVKRGDILLFVARTGNLVGHRFIKRVDLEAGIVQYICKGDSNPDIDLPINSDQIVGAMESMQKYGRWLRSDSFLMQAWGEIVLTIPAFSKVIRMYLRLKRIKPPAKLT	156	0		0			0		1	WP_090792542.1	MTAYIRKNDYEAVQLDLECIILNTDAFTVIKLNEVGGFCWSLLGEVQSIDSIVQAIRMEYEFVEESVEQDIEAFLSELIEQGLVEHAV*	0	1	WP_171909148.1	MEKVVDHEPKMYSRPMVVSHQPIRFETTQSCNKGNGEDDHSDTEIDGIGGKHKVP*	0					Yes	WP_171909356.1	WP_090792534.1
1	WP_083964681.1 signal peptidase I [Bacillus litoralis]	Bacteria	Bacillota	Bacillales	Bacillaceae	Metabacillus	WP_083964681.1	MDWCTMQFNKDTVDLLIRTMQKYGWMDLPSYGTSMYPFIQKGNICRFVEFNEKTVKKGDILLYHSSTGQLIAHRFLRGKKVNDQLKYELKGDTNLCSDELISQDQIIGKLVTINKQKKKVYITDLSAILWGYMIVSVPYISKVLKSYLSFKESIKTRYGVSI	162	2	WP_066335198.1; WP_066335174.1	0			1	WP_066335198.1	0		MKQYIKKSDYETVHLDDEWIIMNTDNFTVTKLNAIGGFCWTLLEQPQSSGSLSQSIKQKYDLQNESLLTDIEEFLGELIEYGLVHHAV*	1		WP_066335206.1	MTGKISENRPMVLEHQAIRFETAQSWNPGRGNLNHPGTGNDGVNWPPNNPNPTPGGAGAPGQGKGKNK*	1	WP_066335174.1	MDKTQRISLTHIVSQEEGNIVSDMDGEKVMLNIQNGKYYNLGDIGGDIWDLIKKPTSINQLVNSLFSQYDVELSKCEEQVMSYLNLLYDERLIKVEED*	WP_066335166.1	WP_066335177.1	Yes
1	OAS85161.1 hypothetical protein A6K24_06535 [Bacillus litoralis]	Bacteria	Bacillota	Bacillales	Bacillaceae	Metabacillus	OAS85161.1	MQFNKDTVDLLIRTMQKYGWMDLPSYGTSMYPFIQKGNICRFVEFNEKTVKKGDILLYHSSTGQLIAHRFLRGKKVNDQLKYELKGDTNLCSDELISQDQIIGKLVTINKQKKKVYITDLSAILWGYMIVSVPYISKVLKSYLSFKESIKTRYGVSI	157	2	OAS85162.1; OAS85155.1	0			1	OAS85162.1	0		MKQYIKKSDYETVHLDDEWIIMNTDNFTVTKLNAIGGFCWTLLEQPQSSGSLSQSIKQKYDLQNESLLTDIEEFLGELIEYGLVHHAV*	1		OAS85164.1	MTGKISENRPMVLEHQAIRFETAQSWNPGRGNLNHPGTGNDGVNWPPNNPNPTPGGAGAPGQGKGKNK*	1	OAS85155.1	MDKTQRISLTHIVSQEEGNIVSDMDGEKVMLNIQNGKYYNLGDIGGDIWDLIKKPTSINQLVNSLFSQYDVELSKCEEQVMSYLNLLYDERLIKVEED*	OAS85153.1	OAS85156.1	Yes
1	WP_101566229.1 hypothetical protein [Bacillus sp. UMB0893]	Bacteria	Bacillota	Bacillales	Bacillaceae	Bacillus	WP_101566229.1	MNMQFDQKTINLLKATIEKHGWIDLPAEGFSMYPFIQKGEICRFTKFNDNALKKGDILLFHTKLGQLIAHRFYRVDKGQLLLKGDTNECLDEPVLPSQVIGYLESVQKQKQMMSMHKPFASLLSKVIVGFPFSARLFRYYLRRKLGDLS	149	2	WP_101566227.1; WP_101566533.1	0			1	WP_101566227.1	0		MTTHYKQAPDCETVEVDGEWMILHSEQFTITKLNETGGFCWSLLKEALTIDELVLSYENQYKKNNHKTKNELQGFLSELVECGLIEHAV*	1		WP_101566223.1	MSDKHGITVSRPMVLSHQTVRFETAQSWNPGRGNRDHPGTGNDGINFPPGNPNPPGGAGTPGKGHGKK*	1	WP_101566533.1	MDGDKVMMSVENGKYYSLGYVGGEIWDIISEPIVIETIIEKLTSSYKVEAAQCKEQVVSFLSSLHMEHLIIVKN*	WP_101566241.1	WP_101566237.1	Yes
1	WP_098846526.1 hypothetical protein [Bacillus sp. AFS055030]	Bacteria	Bacillota	Bacillales	Bacillaceae	Bacillus	WP_098846526.1	MQANQEIVALIKSTMSKKGWIDLPALGKSMFPYIQEGDICRFIEKKPTLLKTGEIVLFYNTNGQLVAHRLHKTFINHDKKSFLFKGDSNLGFDEIVSESQIIGKLEYIHDRGIKNRNDFSKLYGYLVLRFPILSRLFRIYLDKIKIS	147	2	WP_098846527.1; WP_098846532.1	0			1	WP_098846527.1	0		MDKYIRNEQYDVTTNFDNEWIILNTDKFTVTKINEIGGFCWSLLKQPQSIDTLVQAIKQEYEEVNESVEEDIHHFLSELLTLNLINYAS*	1		WP_098846529.1	MNSTKTEAKVYQRPSILDHQQVRFETAQSWNPGKGNQDHPGHGNGGINFPPGNPNTTPGGAGTPGHGNGHGHGKP*	1	WP_098846532.1	MIKTSKISLKSQIVQNEGNIVSDMDGEKVMLNVQNGKYYNLGEIGGVVWSFLEEPITISGLIKALISEYEIEERECEEQIVSFLDHLLSEKLISILDDSNC*	WP_098846530.1	WP_098846533.1	Yes
1	KML27626.1 hypothetical protein VL11_20025 [Bacillus aryabhattai]	Bacteria	Bacillota	Bacillales	Bacillaceae	Priestia	KML27626.1	MQANNKQGHLLKALIDRNGLLELPAEGTSMYPLIKQGDICQFTSIKHSPLKRGDIVLFESPANKLIAHRLLNCSYVQEEEYYIFKGDTNYGVDDLVTREKIIGKLVVIQKKSVAIQEKNVIAVLWGKLILAFPLLSVLLRKYINYQEWKKAD	152	2	KML27627.1; KML27260.1	0			1	KML27627.1	0		MEIDSEWVILNSHAYTVTTLNEVGGYCWKVIENKKTLAEIIKAVAAYYNTEAEMVEGDIQHFLNKLIDCGLVEKYAS*	1		KML27256.1	MQEKTYSAPEVLNHQLIRFETAQSWNPGKGNLDHPGKGNNGSNWPSTNPNPTPGGAGAPGKGKGKNK*	1	KML27260.1	MIKNQDISMNQLVSQETGHIVSDMDGEKVMLSISNGKYYNLGEIGGEIWEKIKEPISVSELISTLVTQYNVEQSDCEEQVIAFLSGLIKEGLIQVAENNRS*	KML27262.1	KML27259.1	Yes
1	WP_065857748.1 hypothetical protein [Paenibacillus pectinilyticus]	Bacteria	Bacillota	Bacillales	Paenibacillaceae	Paenibacillus	WP_065857748.1	MPFPNEFVKLFAQVLKKRGWIELPAQGTSMFPFIRRGDICRFVPALATQIRRGDILLFCTPQGNLIAHRLCRKVITNEQLTLLCKGDSNLSYDVAIQQDQLIAKMDWIKRNERIIFVTSPLAYIWGHLVLTVPMVSVALQYYLYHRERIHTS	152	2	WP_065858693.1; WP_065857743.1	0			1	WP_065858693.1	0		MTQYLRMNDYESIQLDMEWIILNTDEYTLTKLNGVGGFCWSMLGTAQTVSSISEAVRREYESVDETVEADIEAFLRDMIGRGLVQYAVS*	1		WP_065857749.1	MDNEGADRPKRYTRPLVLSQQPVRFETAPSWHEGQGHSDHAGARDGERHDSNPSYRESRKGNGHSKL*	1	WP_065857743.1	MIKQATLTIVDIVEQGKGNIVSNMGEDKVMLNVQHNKYYNLGEVGGRIWELIASPTVIAEIILTLISEYQVEKEQCEEHVIGFLEHLLKEELIYVREK*	WP_065857746.1	WP_065858691.1	Yes
1	WP_014642254.1 signal peptidase I [Halobacillus halophilus]	Bacteria	Bacillota	Bacillales	Bacillaceae	Halobacillus	WP_014642254.1	MSVKPLHAVAIQGIIHKKGFIDLPSLGNSMYPLIKEGDICRFVTCNFTHLTEGDILLYHLNGELVAHRLIEKINVEGNVFFQCKGDTNLGKDQWVMEKDVIGKLLYIKRNKRVTSALGRTAKVWGWSILSLPVLSSFLRFYINKKGV	147	1	WP_014642253.1	0			1	WP_014642253.1	0		MNLYKRKEFHEVMQVDNEWIILNLEDYTATTVNEVGNFCWNELATSHSSEEIVSKVKQQYDIDEDQIEKDIALFLANLHQCGLVENVG*	1		NA	MKKLYRKPEVLDHRPIQFETSQSWNRGRGPVSGDPGKSNGKNYPHDPYKPKKPHPNK*	0					No
1	WP_051567174.1 hypothetical protein [Bacillus flexus]	Bacteria	Bacillota	Bacillales	Bacillaceae	Priestia	WP_051567174.1	MEQQGWINIPAIGMSMYPNIKEGDSCRFVTCNLSYLSKGDIVLFESQEGKLVAHRFISRKQDDKGSFYLFKGDTNLRLDDVIRPSSIIGKLETIKKGNRIIESTSFLNKLWGRLVVSLPFLSRLLNIYIHRVLGK	135	1	WP_025910501.1	0			1	WP_025910501.1	0		MSCYIRKENYEIVEIDQEWVILNTDAYTVTTINELGKYCWTLLNTPQSSSSLYQAIINKYETSINALESDIESFLLELTSCNLIEHAN*	1		WP_025910503.1	MQNNVHEAPKVLNHQAIQFETAQSWNPGKGNRDHPGTGNDGINFPPGNPNPPGGAGTPGKGNGKK*	0					No
1	WP_121662772.1 signal peptidase I [Bacillus litoralis]	Bacteria	Bacillota	Bacillales	Bacillaceae	Metabacillus	WP_121662772.1	MDWSNMQFNQDTVELLLITIKKYGWIDLPSYGTSMYPYIKKGNICRFVHFDEMNVKKGDILLYHTNSGQLIAHRLLSVLKQDNNQKQFVLKGDTNLCTDEPINQNQIIGKLITIQTTKSKKYTNKFPSIAWSKFILSFPIVSRLLRYYLSVEYQYKNRSGVST	163	2	WP_121662771.1; WP_121662778.1	0			1	WP_121662771.1	0		MTQYIKKSDYEAVQLDDQWIILNTDQFTVTKLNDLGGYCWSLLDSPQTVERMTQLIEEKYILDNNSLSSSIQEFLQELIEYGLVQHAV*	1		WP_121662769.1	MTLKTSDNRPLVLDHQAIRFETAQSWNPGKGNTNHPGTGNDGVNWPGNNPNPTPGGAGAPGKGAENRRK*	1	WP_121662778.1	MIKTQKILISHIAQQREGNIESDMDGEKVMLNLENGKYYNLGGTGGVIWDLMKEPISISKIIDRLLLEYDVERSECEEQVMEFINLLNDDGLLILES*	WP_121662782.1	WP_121662780.1	Yes
1	WP_056831861.1 signal peptidase I [Paenibacillus sp. Soil787]	Bacteria	Bacillota	Bacillales	Paenibacillaceae	Paenibacillus	WP_056831861.1	MGQYDRSTFDLLHKVFAREQEIHITSAGNSMYPLIKEGNDSVFTKVSPSEIKRGDILLFRDDKGRLIGHRFYYKDPSNFYYCKGDSNLSFDRPIPENHILGKLKKIQKKNILLHEHDWTYKIWGSLVIHIPLISRLLRKYLNVRNS	146	1	WP_056831859.1	0			1	WP_056831859.1	0		MSTLMNNTYRCSANLDMMEVDGEFLILDSNQLTVTKLNEMGGKLWGLLQQGLTLQQIITAIQDEYDINGADVESDVVSFLNELSQMGLVEHGSVR*	1		NA	MRNLNKKNYSVPQVISHQLIKFETVPSHVCDGPAGDKNPHCK*	0					No
1	KHE71671.1 hypothetical protein LD39_08580 [Halobacillus sp. BBL2006]	Bacteria	Bacillota	Bacillales	Bacillaceae	Halobacillus	KHE71671.1	MSVKPVHAFAIQHVINKKGFIDLPSLGTSMYPLIKQRDTCRFVSCRPDQLTKGEVLLFHLNGELIGHRLIEKVEVEGKIVFQCKGDTNLGKDQWIMEKDIIGKLLYVKRRKRSILAFDHLCKLWGWSVLSFPLMSSFLRFYLNKKGI	147	1	KHE71667.1	0			1	KHE71667.1	0		MSGYKRKGFHEVMQVDEEWMIMNLEDYTVTTVNEVGNFCWEQLADEQTTEAIVSKVSKQYHVKEQVAAEDVGFFLLKLQECGLIEDVS*	1		NA	MTKQMYRSPEVLDHRPIQFETSQSWNKGRGPVSGDDGKSDGDNYPNDPFTPKKPHPKR*	0					Yes	WP_035547607.1	WP_035547613.1
1	WP_052158783.1 hypothetical protein [Halobacillus sp. BBL2006]	Bacteria	Bacillota	Bacillales	Bacillaceae	Halobacillus	WP_052158783.1	MKMSVKPVHAFAIQHVINKKGFIDLPSLGTSMYPLIKQRDTCRFVSCRPDQLTKGEVLLFHLNGELIGHRLIEKVEVEGKIVFQCKGDTNLGKDQWIMEKDIIGKLLYVKRRKRSILAFDHLCKLWGWSVLSFPLMSSFLRFYLNKKGI	149	1	WP_035545214.1	0			1	WP_035545214.1	0		MSGYKRKGFHEVMQVDEEWMIMNLEDYTVTTVNEVGNFCWEQLADEQTTEAIVSKVSKQYHVKEQVAAEDVGFFLLKLQECGLIEDVS*	1		NA	MTKQMYRSPEVLDHRPIQFETSQSWNKGRGPVSGDDGKSDGDNYPNDPFTPKKPHPKR*	0					No
1	WP_111614096.1 signal peptidase I [Bacillus sp. YR335]	Bacteria	Bacillota	Bacillales	Bacillaceae	Bacillus	WP_111614096.1	MQFNKDTIDLFIQTMRNYGWMDLPSYSMSMYPFIKKGNICRFVAFELDKAKKGDILLYHSSSGQLVVHRFLQVKKSDNQLQFVLKGDSNTHMDEPICSDQIIGKLVTIDTDKRKIYTSDYTAIFWGYLISTYPIFSKVLRTYLYFKRRVKTKFSVSL	157	0		0			0		0			0				0					No
1	WP_083537035.1 MULTISPECIES: hypothetical protein [Paenibacillus]	Bacteria	Bacillota	Bacillales	Paenibacillaceae	Paenibacillus	WP_083537035.1	MLASKGYVDIPSHGVSMFPLIRTGNICRFEPFSAERLQAGDILLYLSDKGVLVGHRYCRQTRENGRTLFICKGDSQDYDDPPLTSEQLLGRLVSIRKGRVELRADGLLLAGWGKIIIRLPLLSTGIHWYLRAARKLRGMKAVT	143	1	WP_072329978.1	0			1	WP_072329978.1	0		MTNPIVSTAYRRAANAEAFEVEGQWVIMHADQYTITKLNEVGGLIWSKLGEEQTSEALVGAILDQYEITEPEAERDVDAFLTQLLQLGLIEYAG*	1		NA	MSKKLYSKPEIVKHESIVFETGLSSCIKIATVEHTNPPEKVCLRQDHTWGPLPK*	0					No
1	WP_112880596.1 signal peptidase I [Paenibacillus montanisoli]	Bacteria	Bacillota	Bacillales	Paenibacillaceae	Paenibacillus	WP_112880596.1	MREAADLRMLQTLIKKKGYVELPSSGNSMYPIISQGNICRIIAVEPNEISRGDIVLFVSSFQALIGHRLLQVVQRGEEMLYIFKGDANPHSDEPVKFDRIVGKLIEVRKSHIRFHSKHWVFLLWKKMILAAPSISILFRAFLKIKRALKGSAQKVHGV	158	1	WP_112880595.1	0			1	WP_112880595.1	0		MTTHYKSVNHMEVIQMDDEWLALDTSTYSVTRLNESGGFCLSMLSEPRNSEDMASELENRYGISAEDAKRDVKVFLTHLLQIGLVNYA*	1		NA	MLKKTNYQAPAVLQSKNIVFETKVSGHPSNGNGNPGTANPVDGNGNSNGNGPKK*	0					No
1	WP_053074081.1 MULTISPECIES: signal peptidase I [Bacillus]	Bacteria	Bacillota	Bacillales	Bacillaceae	Priestia	WP_053074081.1	MIAALLKSMQANNKQGHLLKALIDRNGLLELPAEGTSMYPLIKQGDICQFTSIKHSPLKRGDIVLFESPANKLIAHRLLNCSYVQEEEYYIFKGDTNYGVDDLVTREKIIGKLVVIQKKSVAIQEKNVIAVLWGKLILAFPLLSVLLRKYINYQEWKKAD	160	2	WP_115653802.1; WP_115653798.1	0			1	WP_115653802.1	0		MTSYIQKGGYEVMEVDSEWVILNSHAYTVTTLNEVGGYCWKVIENKKTLAEIIKAVAAYYNTEAEMVEGDIQHFLNKLIDCGLVEKYAS*	1		WP_048021064.1	MQEKTYSAPEVLNHQLIRFETAQSWNPGKGNLDHPGKGNNGSNWPSTNPNPTPGGAGAPGKGKGKNK*	1	WP_115653798.1	MIKSISISQFVSQGEGNIVSDMDGEKVMLSIHNGKYYNLGELGGEIWEKIKEPVSIQNLVDELVDQYDVELDTCKEQVISFLTLLINEGLVKVEGEKVS*	WP_115653795.1	WP_115653799.1	Yes
1	RBP88261.1 signal peptidase [Bacillus firmus]	Bacteria	Bacillota	Bacillales	Bacillaceae	Bacillus	RBP88261.1	MYPLIQKGEICRFIPCEPSLLTKGDITLFWAESGQLVVHRFYHEEMIQGFPHYVFKGDTNLGFDLPVSKDRIVGKLLYVQKASRKVNVEDLHAYAWGKLILAMPVLSGLLRKYLNKRKRPQF	122	1	RBP88262.1	0			1	RBP88262.1	0		MARYVQKSSYESTHLDNEWIILNTDDYTVTKLNDIGGFCWSLLEAEQTLESLTQAVGREYLETKVSEREIEEFLSQLMECGLVKYAV*	1		NA	MKTLDCHEKKENTRPMVLSHQPIRFETAHSWNKGVGNKNPNGNGNGGINYPNDPRPQKPGTGPGSGNGGGNGNGKGRGSN*	0					Yes	WP_113884988.1	WP_113884993.1; WP_113884991.1
1	WP_035436624.1 MULTISPECIES: S26 family signal peptidase [Bacillus]	Bacteria	Bacillota	Bacillales	Bacillaceae	Bacillus	WP_035436624.1	MEERSLPVSGIKYLLQKQGWVDLPSVGVSMYPLIQEGDICRFIPLGSEEVRKGEVVLFVSNQGQLIGHRYFDNFVENGVLYYVCKGDTNFSVDSPVKKSQLIGKLAYIKKEKFQLNSKDFIARLWGGIVLTFPSLPRGCKKYLDLRTRLRK	151	1	WP_016763295.1	0			1	WP_016763295.1	0		MSLKCECAKNINIVEIDNEWIIMDTENFTVTKVNAIGAYILEEVRGQRELEDIICNIADNYDVDLNTARSDVLIFLEELKGIGLIKNGRA*	1		WP_090997035.1	MYLYFKVSVLYNERRALHFILGGKTMNTENRNEQKAYTRPMVLSSQPIRFETAQSWNKGHGNLDHPGHGNGGIHYPNPPYTGPHKGNGGGHGGGKRK*	0					No
1	PHA03103.1 hypothetical protein COE51_01800 [Bacillus pseudomycoides]	Bacteria	Bacillota	Bacillales	Bacillaceae	Bacillus	PHA03103.1	MKEHSLPVSGIKYLLQKQGWIDIPSSGVSMYPLIKEGDICRFIPLGSKEVRKGEVLLFVSNQGQLIGHRYYDNFVENGVLYYVCKGDTNISVDSPIKKSQLIGKLVFIKKKKFQLNSQGFIAQLWGGIVLTFPSLPRGCKKYLDLRTRLRIWSK	154	2	PHA03102.1; PHA03106.1	0			1	PHA03102.1	0		MNLKYECTKNINIVEIDNEWIVMDTENFTVTKVNAIGAYILEEVRGQRGLEDIICNIADNYDVDLNTARSDALVFLEELKGIGLIQDERA*	1		PHA03100.1	MKTKNQNRQKSYTRPMVLSSQPIRFETAQSWNCGQGNKDHPGNGNGGPNHKPPGHICPPGKGHGS*	1	PHA03106.1	MINAQKISLECQVVQSKGNIVSDMDGEKVMLNVQKGKYYNLGEMGGEIWDLIEEPITVAQLVTTLISSYNVERIECEEQVLSFLELLFKENLIYIED*	PHA03104.1	PHA03107.1	Yes
1	WP_052500325.1 hypothetical protein [Bacillus megaterium]	Bacteria	Bacillota	Bacillales	Bacillaceae	Priestia	WP_052500325.1	MPINQESVVLLKNVIEKKGYVHFPSEGFSMYPCIRQNDLCTFEKAPVLKKGDIGLFHTKRGQLIAHRLIKTRYKNEQLHYIFKGDTNLCCDEPVTREQVIGKLTAISRKKQKKVYMAAPFDYIWCWLMLFFPFSSRFLKKYINQKIVN	148	1	WP_016763295.1	0			1	WP_016763295.1	0		MKQFIRNQDMEAVQLDSEWVILNTEAYTVTKINELGGCCWSLLENPCTIPSLIKSLQTDYQIEDELSFEDMESFLSELIKYGLIDYAN*	1		NA	MKMTKKQPGVSSKRPMVMDHQPIRFETAQSWNPGQGNQDHPGHGNGGVNFPPNNPNRP*	0					No
1	WP_010678062.1 hypothetical protein [Bacillus timonensis]	Bacteria	Bacillota	Bacillales	Bacillaceae	Bacillus	WP_010678062.1	MQVKSTEIALISNVLRKYGTIDLPSKGMSMYPFIKEEDICSFSVCNPAFLKKGDIVLFFLKNGQLVAHRFYNNTIISNKKHFIFKGDTNLAFDEPVEADQILGKLTKLNRKNKSKKITSFKNKCWTQLIITMPSISNLLQVYLSKTQGNKLHIRI	155	2	WP_010678061.1; WP_010678058.1	0			1	WP_010678061.1	0		MNQYIKKSNYDITQLEDEWIILNTDNYTITKLNQIGGFCWHLLDKSQSPNSLLQEIKENYNSSTTFEDVENYLQQLIQCGLVEHAG*	1		WP_010678059.1	MNIKVVEDRPLVLSHQAIRFETAQSWNCAGRMGNGKIPGPPGDGNGGPPGGAPNMGNVPPWACGPGGNNGNNGNNGKGRGNG*	1	WP_010678058.1	MLTNQTISLNNIVSQREGNIVSNMGEEKVMLSVQNGKYYNLGEIGGEIWDQIESPKSVNEVISSLLNVYDVTQAECEEQVLSFLEHLYNEKLIEIK*	WP_010678068.1		Yes
1	WP_025028645.1 signal peptidase I [Bacillus mannanilyticus]	Bacteria	Bacillota	Bacillales	Bacillaceae	Caldalkalibacillus	WP_025028645.1	MQSNHQEALITLIQKTIQKNGSIDLPSSGFSMYPFIQKNDICTFVECTPSTLKQGDIVLFYCSEKKLTAHRFKEAVTIHNMPIYIFKGDTNLLPDDPVTENQLLGKLVQIKRKQKKILMTDLSSRIWSKIIFSFPILSRILKRVIKKKIRITTGASV	157	1	WP_025028644.1	0			1	WP_025028644.1	0		MIQYIRTPNFEETILDDEWVILNTDNHSITRLNDIGGFCWTLLSEPQTFKSIMEAIHQEYDIQDQSIEEDIQRFLEDLIECGLIRDAE*	1		NA	MEKKAYSAPQVLSFQAVKFETAISKNFKPCGMFPKPGKPMPPGIEMLCRK*	0					Yes	WP_025025661.1	WP_025025659.1
1	WP_114744548.1 hypothetical protein [Falsibacillus pallidus]	Bacteria	Bacillota	Bacillales	Bacillaceae	Falsibacillus	WP_114744548.1	MFDQQTINLLQNVIKREGKITLPATGNSMFPYIRRGDSCTFIPFEPDELKRGDIALFHQIDGRLVAHRFFYVHHDQYLFKGDSNQGFDHVVAKEQLIGKLVSIKRNNRLYAPSAIWKMMILNVPMLSGMIRLYINKRKC	139	1	WP_114744547.1	0			1	WP_114744547.1	0		MKKYIQNRGCETTQLDNEWIILNSNNLTVTKVNEVGGYCWELLQNEQSLENLVSAVEVQFSGELRQEEITEDIKEFLDSLLQCEVIEVVV*	1		WP_114744545.1	MFFKMNEKCFIIKISNLFKKFLFILFYIKNKKEVNILSNACLYSKPKVVVHQPIRFETAQSWNKGHGNLDHPGKGNGGTNYPNDPYTGPHNGNGGGNGNGKGNGDKP*	0					Yes	WP_114744520.1	WP_114744517.1
1	WP_051250709.1 signal peptidase I [Paenibacillus harenae]	Bacteria	Bacillota	Bacillales	Paenibacillaceae	Paenibacillus	WP_051250709.1	MRQQSNDALFQLLARIMQRDGRLVIPAKGSSMFPLIREGNLCRFRPVMTENIRKGDIILFSTESGQLIAHRLLTVMRREERLLYICKGDTNLGCDEPIRREQMLGVLYSIRKARKELHMSDRSVSLWTKAVIALPIISQGLNRYLSFQKTRSANGVSL	158	1	WP_028610131.1	0			1	WP_028610131.1	0		MTLYIRNPSCEAIELDGETMILNPDGLTITQLSPVASYCWSLLSETHSAGSLSSAVRSHYEETDLAVEQDISLFLRELMECGLIAAAE*	1		WP_028610133.1	MIKPMYEKPVVLNHRPIQFETVVSGSGNFPGLGNGVDGVPAKERGDFPGQGATEGTFPGKGPTHNHRP*	0					Yes	WP_029192449.1	WP_029192445.1; WP_029192446.1
1	WP_098197022.1 MULTISPECIES: hypothetical protein [Bacillus]	Bacteria	Bacillota	Bacillales	Bacillaceae	Bacillus	WP_098197022.1	MPINQESVVLLKNVIEKKGYVHFPSEGFSMYPCIRQNDLCTFEKAPVLKKGDIGLFHTKSGQLIAHRLIKTRYKNEQLHYIFKGDTNLYCDEPVTREQVIGKLTAISRKKQKKVYMAAPFDYIWCWLMLFFPFSSRFLKKYINQKIVN	148	1	WP_098197021.1	0			1	WP_098197021.1	0		MKQFIRNQDMEAVQLDSEWVILNTEAYTVTKINELGGCCWSLLENPCTIPSLIRSLQTDYRIEDELSFEDMESFLSELIKYGLIDYAN*	1		NA	MKMTKKQPGVSPKRPMVMDHQPIRFETAQSWNPGQGNQDHPGHGNGGVNFPPNNPNRP*	0					No
1	WP_129542342.1 hypothetical protein [Bacillus megaterium]	Bacteria	Bacillota	Bacillales	Bacillaceae	Priestia	WP_129542342.1	MIMPINQESVVLLKNVIEKKGYVHFPSEGFSMYPCIRQNDLCTFEKAPVLKKGDIGLFHTKSGQLIAHRLIKTRYKNEQLHYIFKGDTNLCCDEPVTREQVIGKLTAISRKKQKKVYMAAPFDYIWCWLMLFFPFSSRFLKKYINQKIVN	150	1	WP_016763295.1	0			1	WP_016763295.1	0		MKQFIRNQDMEAVQLDSEWVILNTEAYTVTKINELGGCCWSLLENPCTIPSLIKSLQTDYQIEDELSFEDMESFLSELIKYGLIDYAN*	1		NA	MKMTKKQPGLSSKRPMVMDHQPIRFETAQSWNPGQGNQDHPGHGNGGVNFPPNNPNRP*	0					No
1	WP_098572840.1 signal peptidase I [Bacillus sp. AFS073361]	Bacteria	Bacillota	Bacillales	Bacillaceae	Bacillus	WP_098572840.1	MLIDNHTLSLLKRTIKKDGWLELPAHGNSMYPFIQQGNLCRFIPCPSSQLKKGDVILFYSQTGQLIAHRFVNVTNIDNQLFFLFKGDTNLGYDQLIREEFILGKLASVQKKQLTIIPQHFLARCWGKMILTFPFLSGMLRKYINRKFKLQF	151	1	WP_098572839.1	0			1	WP_098572839.1	0		MTTQYIQKGNYEATELDGEWIILNTDQYTITKLNDEGGHCWSLLTEVQTVDSLTQSLLAKFATIENELQVKKDMEDFLANLVQCGLIEHVD*	1		WP_098572837.1	MIIEKVYSRPTVLSHQPIRFETAQSWNPGKGKHDHPGKGNGGINFPPGNPNDIPCGAGTPGNGNNNGNGNGNGNIGVGQCNPNVNP*	0					Yes	WP_098572810.1	WP_098572808.1
1	SDC94599.1 Peptidase S24-like [Bacillus aryabhattai B8W22]	Bacteria	Bacillota	Bacillales	Bacillaceae	Priestia	SDC94599.1	MPINQESVVLLKNVIEKKGYVHFPSEGFSMYPCIRQNDLCTFEKAPVLKKGDIGLFHTKSGQLIAHRLIKTRYKNEQLHYIFKGDTNLCCDEPVTREQVIGKLTAISRKKQKKVYMAAPFDYIWCWLMLFFPFSSRFLKKYINQKIAN	148	1	SDC94620.1	0			1	SDC94620.1	0		MKQFIRNQDMEAVQLDSEWVILNTEAYTVTKINELGGCCWSLLENPCTIPSLIKSLQTDYQIEDELSFEDMESFLSELIKYGLIDYAN*	1		SDC94684.1	MKMTKKQPGVSSKRPMVMDHQPIRFETAQSWNPGQGNQDHPGHGNGGVNFPPNNPNRP*	0					No
1	WP_016763296.1 hypothetical protein [Bacillus aryabhattai]	Bacteria	Bacillota	Bacillales	Bacillaceae	Priestia	WP_016763296.1	MPINQESVVLLKNVIEKKGYVHFPSEGFSMYPCIRQNDLCTFEKAPVLKKGDIGLFHTKSGQLIAHRLIKTRYKNEQLHYIFKGDTNLCCDEPVTREQVIGKLTAISRKKQKKVYMAAPFDYIWCWLMLFFPFSSRFLKKYINQKIVN	148	1	WP_088567779.1	0			1	WP_088567779.1	0		MKQFIRNQDMEAVQLDSEWVILNTEAYTVTKINELGGCCWSLLENPCTIPSLIKSLQTDYQIEDGLSFEDMESFLSELIKYGLIDYAN*	1		NA	MTNRKEDYIMKMTKKQPGVSSKRPMVMDHQPIRFETAQSWNPGQGNQDHPGHGNGGVNFPPNNPNRP*	0					No
1	WP_116371984.1 signal peptidase I [Bacillus megaterium]	Bacteria	Bacillota	Bacillales	Bacillaceae	Priestia	WP_116371984.1	MPMLINQESVLLLKDVIEKKGYVDFPSVGFSMYPCIRQNDLCTFEKAPVLKKGDIVLFHTRSGQLIAHRLIKTRHENEHLQYIFKGDTNLYCDEPVMREQVIGKLTAISRKNQKKVYMATPFDYIWCWLMLFFPFSSRFLTKYINQKIVN	150	1	WP_116371985.1	0			1	WP_116371985.1	0		MKQFVRNQDMEAVQLDSEWVILNTEAYTVTKINELGGYCWSLLERPCTIPSLIKFLQTDYRIEEELSFEDIESFLSELMGYGLIAYAN*	1		WP_116371987.1	MKKFETETNLSSKRPLVLDHQPIRFETAQSWNPGKGNQDHPGHGNGGINFPPNNPNNPNRP*	0					No
1	RDI45729.1 signal peptidase [Falsibacillus pallidus]	Bacteria	Bacillota	Bacillales	Bacillaceae	Falsibacillus	RDI45729.1	MLFDQQTINLLQNVIKREGKITLPATGNSMFPYIRRGDSCTFIPFEPDELKRGDIALFHQIDGRLVAHRFFYVHHDQYLFKGDSNQGFDHVVAKEQLIGKLVSIKRNNRLYAPSAIWKMMILNVPMLSGMIRLYINKRKC	140	1	RDI45728.1	0			1	RDI45728.1	0		MKKYIQNRGCETTQLDNEWIILNSNNLTVTKVNEVGGYCWELLQNEQSLENLVSAVEVQFSGELRQEEITEDIKEFLDSLLQCEVIEVVV*	1		RDI45726.1	MFFKMNEKCFIIKISNLFKKFLFILFYIKNKKEVNILSNACLYSKPKVVVHQPIRFETAQSWNKGHGNLDHPGKGNGGTNYPNDPYTGPHNGNGGGNGNGKGNGDKP*	0					Yes	RDI45697.1	RDI45694.1
1	WP_084821851.1 signal peptidase I [Bacillus sp. SA1-12]	Bacteria	Bacillota	Bacillales	Bacillaceae	Bacillus	WP_084821851.1	MDWCSMQFSKDTVDLLINTIRKYGWMDLPSSGMSMYPFIQKGNICRFEAFNENTVKKGDVLLYHSASGQLIAHRFLRIKQINNQSHYVLKGDTNLCSDEPVKQEQIIGKLVTINRLNKKIHIDDYTAILWSNLIISFPFMSKVLSSHLSIKATNRTRSGVPL	162	1	WP_046513297.1	0			1	WP_046513297.1	0		MKQYIKISDYETVQLDDDWIIMNTDNFTVTKLNNLGGLCWTLLDQPQTLQSLCQSLKNVYDIQNESLPKDIEAFLSELIEYGLVQHAV*	1		WP_046513303.1	MTGKINENRPVVLEHQAIRFETAQSWNPGKGNLDHPGTGNDGINWPPNNPNPTPGGAGTPGNGNGKGK*	0					Yes	WP_046517725.1	WP_046517730.1
1	KKI92978.1 hypothetical protein WQ54_05560 [Bacillus sp. SA1-12]	Bacteria	Bacillota	Bacillales	Bacillaceae	Bacillus	KKI92978.1	MQFSKDTVDLLINTIRKYGWMDLPSSGMSMYPFIQKGNICRFEAFNENTVKKGDVLLYHSASGQLIAHRFLRIKQINNQSHYVLKGDTNLCSDEPVKQEQIIGKLVTINRLNKKIHIDDYTAILWSNLIISFPFMSKVLSSHLSIKATNRTRSGVPL	157	1	KKI92979.1	0			1	KKI92979.1	0		MKQYIKISDYETVQLDDDWIIMNTDNFTVTKLNNLGGLCWTLLDQPQTLQSLCQSLKNVYDIQNESLPKDIEAFLSELIEYGLVQHAV*	1		KKI92981.1	MTGKINENRPVVLEHQAIRFETAQSWNPGKGNLDHPGTGNDGINWPPNNPNPTPGGAGTPGNGNGKGK*	0					Yes	WP_046517725.1	WP_046517730.1
1	PJJ25626.1 signal peptidase [Bacillus sp. YR288]	Bacteria	Bacillota	Bacillales	Bacillaceae	Bacillus	PJJ25626.1	MVKKIIKQQGCINIPAIGTSMYPNIKEGDSCRFVTCNLSYLSKGDIVLFESQEGKLVAHRFISRKQDDKGSFYLFKGDTNLRLDDVIRPSSIIGKLETIKKGNRIIESTSFLNKLWGRLVVSLPFLSRLLNIYIHRVLGK	140	1	PJJ25625.1	0			1	PJJ25625.1	0		MSCYIRKENYEIVEIDQEWVILNTDAYTVTTINELGKYCWTLLNTPQSSSSLYQAIINKYETSINALESDIESFLLELTSCNLIEHAN*	1		PJJ25623.1	MQNNVHEAPKVLNHQAIQFETAQSWNPGKGNRDHPGTGNDGINFPPGNPNPPGGAGTPGKGNGKK*	0					Yes	PJJ24900.1	PJJ24897.1
1	WP_094909890.1 MULTISPECIES: hypothetical protein [Bacillus]	Bacteria	Bacillota	Bacillales	Bacillaceae	Bacillus	WP_094909890.1	MQTKTGQSYLVKKIIKQQGCINIPAIGTSMYPNIKEGDSCRFVTCNLSYLSKGDIVLFESQEGKLVAHRFISRKQDDKGSFYLFKGDTNLRLDDVIRPSSIIGKLETIKKGNRIIESTSFLNKLWGRLVVSLPFLSRLLNIYIHRVLGK	149	1	WP_025910501.1	0			1	WP_025910501.1	0		MSCYIRKENYEIVEIDQEWVILNTDAYTVTTINELGKYCWTLLNTPQSSSSLYQAIINKYETSINALESDIESFLLELTSCNLIEHAN*	1		WP_025910503.1	MQNNVHEAPKVLNHQAIQFETAQSWNPGKGNRDHPGTGNDGINFPPGNPNPPGGAGTPGKGNGKK*	0					Yes	WP_025909591.1	WP_025909594.1
1	WP_066056324.1 signal peptidase I [Bacillus korlensis]	Bacteria	Bacillota	Bacillales	Bacillaceae	Robertmurraya	WP_066056324.1	MIFKEEVLHVLQHKLESDSKIILPSIGESMFPFIKNGDLCEFELFDIDKLKKGDIILFWTKTGELIAHRYYCNKSRNNRLYYFCKGDTNLAFDEPIESSNIIARLTFIKRKERNINVNNIAAITWGKIIILIPKLSGIVRAYLNKRSVSL	150	1	WP_066056321.1	0			1	WP_066056321.1	0		MCKYIKKSNVEATLLDNEWILLNVDQFTVTKVNQLGGYCWDLLNEVQTLNELYRSIRVQFPESEELTINDIEQYLTQLIECGLVEHDI*	1		WP_066056315.1	MGLIQKPTVLSHQRIYFETKASGCLKTDSVTANGDRKGLGTNCNPSNKDSGAQSDRVHNT*	0					Yes	WP_066056218.1	WP_066056212.1
1	WP_071355473.1 hypothetical protein [Bacillus sp. MUM 116]	Bacteria	Bacillota	Bacillales	Bacillaceae	Bacillus	WP_071355473.1	MLIDEHTFILLKSTINKDGWLELPAFGYSMYPFIRQGNLCRFVPCDTSSLKKGDILLFHSQDCRLIAHRFIGTKWINHQQRILLKGDTNLGFDLPIGEERVLGKLVSVQKQHFKLSPNHFISKLWGKLILTFPCLSGILQKYLNRKWKLQY	151	1	WP_071355504.1	0			1	WP_071355504.1	0		MTPYIQKENVETTELDGEWILLNTDQLTITKLNEVGGLCWSLLNKEQTAESLALAVSEKFKSTEDKEQLKKDMEEFLSHLDECGLIENVN*	1		WP_071355472.1	MIAEKVYSKPMVLSHQPIQFETRHCWNPGKGNNPDSNGNGGIHFPNDKNPNPTPCGAGTPGNGNGKGNGNGNGKGNGNIGVGQCNPKVN*	0					Yes	WP_256218531.1	WP_071358268.1
1	WP_100530215.1 signal peptidase I [Bacillus sp. mrc49]	Bacteria	Bacillota	Bacillales	Bacillaceae	Bacillus	WP_100530215.1	MLYDKEIVELFLMTIKKEGSIHLPAQGSSMYPFIKNGEICSFNECDPIHLKKGDIVLFYTSSNRLIAHRYYKELKDGQRRQYLFKGDTNICFDEAIYREQMVGKLVYVQKRKYKLLVSGFLARTWAGLILAIPFLTGILRKCLNIQQRLKGSRSQ	155	1	WP_100530214.1	0			1	WP_100530214.1	0		MVQYIHSKHVEATQLGEEWIILHTENFTVTKLNEIGGFCWGLLDQAQTVDSLVQSLSDRYAVMEEISKRDIESYLLDLLQFGLIKHAV*	1		NA	MEKQTNVKKTYEAPKVLHHQNVTFETAISSSTGHWEFQYVDGCWVRVFVP*	0					Yes	WP_100530192.1	WP_100530190
1	WP_077360331.1 signal peptidase I [Fictibacillus arsenicus]	Bacteria	Bacillota	Bacillales	Bacillaceae	Fictibacillus	WP_077360331.1	MQVNQVTVDLVRRVVKKKGSILLPAHGKSMFPFIRQGDICHFDACDPKTYKRGDIVLFTVGTNRLIAHRFMKRIHKDNQTYYLFKGDTNLLFDEPITQEQILGKMTAIERKKKKVDLKNIRNNLWSLLIINLPMMSKLLRKFIYRKGDFQY	151	1	WP_077360333.1	0			1	WP_077360333.1	0		MNVKYVQRDQCEATQLEDEWVILDTHLYTITKLNEVGGFCWSLLTQPRSLDMLVQAVTDKYNAKSSIETVQQDVENFLSDLISYGLLEHAS*	1		WP_077360337.1	MERTKNPTGYQKPEVLSHQPVRFETAQSWNPGKGNLNHPGTGNDGVNWPPNNPNPTPGGAGAPGRGRGRGRKR*	0					Yes	WP_077360390.1	WP_077360394.1
1	WP_060673840.1 signal peptidase I [Bacillus vietnamensis]	Bacteria	Bacillota	Bacillales	Bacillaceae	Rossellomorea	WP_060673840.1	MLANQEAIHLISNVMKKHKWIDLLAQGTSMFPYIQDGDVCTFVTCSPAELQKGDTALYHTVQGKLVTHRFVKQQTINEDTFYIFKGDTNLGFDEPVGDQQIVGKLIYIKRRRRRISAESVRSILWSKAILLLPYLSQWLRSYLNSRDTVRN	151	2	WP_060673832.1; WP_060673820.1	0			1	WP_060673832.1	0		MMTKFVKTKEYEASQFDDEWVILNTDQFTATKVNEVGGFCWGLLDNEHTVDSIAEEVKQHFEIVEDTESFKHDIDQFLKELHRYGLVTNVS*	1		WP_060673830.1	MVLGKRQNEKYFKPEVLSHQQIVFETAQSWNPGKGNRDHKGTGNDGVNFPPGNPNTIPGGAGTPGKGKGKGKN*	1	WP_060673820.1	MIRNQESMILCCRVSIHGESIESNMGGERVLLNVENGKYYNLGEVGGVIWDCLKSSKTIEQTISILLDEYDVEPSVCEENVLTFLHSLEEENLIAVNND*	WP_060673816.1	WP_060673822.1	Yes
1	WP_094015971.1 signal peptidase I [Paenibacillus rigui]	Bacteria	Bacillota	Bacillales	Paenibacillaceae	Paenibacillus	WP_094015971.1	MRFSKDTMLLLYNAIDKHGSIDLPAHGHSMFPLINEGEICRFESCDGSLLKKGDIALFHSWNGQLVAHRFYRHETIRQRPCLVFKGDTNWGPDEPVVQEQLIGKLVRIQKRNTIVHVTDGMVKLWSKIIVSFPFLSLLLKLCVIPRRFHY	150	2	WP_094015970.1; WP_094015976.1	0			1	WP_094015970.1	0		MTQYVWRNQYETVELDGEWIILNTDSFTVTKLNDLGGFCWTLLQSAQTLPALLQAVHEQYEAVSPTAEQELESFVTDLMQRGLLKYAV*	1		WP_094015968.1	METGKQTIRKKYSSPQILSHQPIRFETAQSWNRGKGNKDHPGHGNGGIHYPLDPRPSKNK*	1	WP_094015976.1	MMTNKTVSLKESYVQAKGNIVSDMGGEKVMLSVHNGKYYNLGEVGGTIWDCLAVPASVQEVVSALMSEYQVEQGECEQQVVSFMEHLLEEKLIGIHS*	WP_094015974.1	WP_094015977.1	Yes
1	WP_064091673.1 signal peptidase I [Bacillus aquimaris]	Bacteria	Bacillota	Bacillales	Bacillaceae	Rossellomorea	WP_064091673.1	MQANSVSSTLLMEVMDKKGWMDLPAEGMSMYPLIHDGDQCRFVSLKEQSLKKGDIILFQDASGKLVAHRFLYIKFFGNRVKYLFKGDTNTICDEVISEEQMIGKLVKVRKENVTLTLDHPIAKGWSKLILLFPFISSFLQLILNKK	146	1	WP_064091677.1	0			0		0			0				1	WP_064091677.1	MIKNLDFSLSSIIYQGEDNIVSDMDGEKVMLSIHNGKYYNLGEMGGVIWEQLENPISVERLIANLINEYEVEQDVCQEQVFSFLNLLKEENLINVREE*	WP_064091679.1; WP_064091680.1	WP_064091676.1	Yes
1	WP_015592738.1 hypothetical protein [Bacillus sp. 1NLA3E]	Bacteria	Bacillota	Bacillales	Bacillaceae	Bacillus	WP_015592738.1	MLFDKENIILFKKNIRNHGFIDWEFEGNSMFPLIQKGNICRFVYCEPFKLIKGDIVLYYSETGQLVAHRFFHTKLVKEQRHYLFKGDTNFSFDQPVTEEQIIGKLAFIKKVDKKVWMADLPMGLWGKTILLLPFTSIILGNYINLKNAFNTNFMDSYDGTEETSD	165	1	WP_041580316.1	0			1	WP_041580316.1	0		MKQFIRKSDYETTHSDDELIVLNTDESTVTKLNEQGGYCWSLLGEVQTVESLSKAIQQKYGSDTINKKSNIEVFLLKLMEYGLIKNVV*	0				0			WP_015592733.1		No
1	WP_079414157.1 signal peptidase I [Paenibacillus ferrarius]	Bacteria	Bacillota	Bacillales	Paenibacillaceae	Paenibacillus	WP_079414157.1	MPVDKVSLQLVTQLMEKRGWIELPARGTSMYPLIKQGDICRFVPTEAANIRKGDILLFHVPLGNLVAHRFSQCVKRDQQQYLCKGDTNLAYDEAIVWDQIIGRMTWIQRDERIIHVTELAVYLWGRLVLAVPLISLCLRMYLNRREGIKA	150	2	WP_079414158.1; WP_079414152.1	0			1	WP_079414158.1	0		MTRYLRMNDYESIQLDMEWIILNTDEYTLTKLNGVGGFCWSLLGEAQTVGSISEAVRKEFDSVDETVEEDIEAFLHDMIGRGLVQHAGG*	1		WP_079414160.1	MEDEAKTAQKKYSRPMVLSQQPVRFETAQSWNKGHGNLNHPGKGNGGINYPNPPYTGPHNGKGKGK*	1	WP_079414152.1	MLKNQAISLQYYYVQGKGNIVSDMGGEKVMLSIHNGKYYNLGEIGGRIWELLSQPVGIAEIVTSLMSEYEVEQRECELEVISFIEMLSKEGLIESGEDHGLL*	WP_079414154.1	WP_079414151.1	Yes
1	WP_127455421.1 signal peptidase I [Paenibacillus chondroitinus]	Bacteria	Bacillota	Bacillales	Paenibacillaceae	Paenibacillus	WP_127455421.1	MLFPKESIQLLTRVMAKNGWIELPARGTSMYPFIKKGDICRFSVTTVESIKKGDVLLFRTLGGNLVAHRFCRMVTKNQQLYYLCKGDTNLKHDEAIGLDQLIGKLTWIERKKRIIHTTDLFAHVWGRIILTFPMITLLLRFYLNRKESFQV	151	2	WP_127455420.1; WP_127455427.1	0			1	WP_127455420.1	0		MTKYLRMNDYEFIQLDMECIILNTDEFTLTKLNEVGGYCWSLLGVAQTVSSISEAVREEYASVSESVEEDVEAFLTEMIGRGLVQYAVS*	1		WP_127455418.1	MNDETKKVPKLYTRPMVLSQQPVRFETAQSWNKGKGNLNHPGKGNGGINYPNPPYTGPHNGNGNGKNK*	1	WP_127455427.1	MMNHETISLQDCVCQGKGSIVSDMGGEKVMLSVQNGKYYNLGEIGGKIWDSIENPISIGQLVSTLMREYDVDQNECEQHVISFLAHMAGEGLVQVGADGHRE*	WP_127455424.1	WP_127455546.1	Yes
1	WP_057305001.1 signal peptidase I [Paenibacillus sp. Root444D2]	Bacteria	Bacillota	Bacillales	Paenibacillaceae	Paenibacillus	WP_057305001.1	MQFRKEFLQLITHAMEKRGWIELPARGTSMYPCIKKGDICRFVSTEAANIKKGDIILFHTPHGNLVAHRFCRLVTRNQQLHYLCKGDTNLAHDEAVAMEHLIGKMTWIRRKGRIIQVSSLPSYVWGQTVLSFPMISLLLRAYLNRRESTQA	151	2	WP_057305000.1; WP_057305125.1	0			1	WP_057305000.1	0		MTQYLRMNDYESIQLDMEWIILNTDEYNLTKLNGVGGFCWSLLGAAQTVSSISEAIRKEYESVDETVEEDIEAFLNDMIGRGLVQYAVS*	1		WP_057304998.1	MEENAKREQKLYARPMVLSQQPVRFETAQSWNKGHGNLNHPGTGNGGINYPNPPYTGPHNGNGGGNGKNK*	1	WP_057305125.1	MKYTIPLNVQIVQGEGNIVSDMDGEKVMLNIANGKYYNLGQIGGHIWELISAPISVEELVTALTKEFDVEQEVCEEQTKVFLNHLLEEKIIHVC*	WP_057305004.1	WP_057305007.1	Yes
1	WP_060645560.1 signal peptidase I [Paenibacillus sp. Soil724D2]	Bacteria	Bacillota	Bacillales	Paenibacillaceae	Paenibacillus	WP_060645560.1	MQFRKEFLQLITHAMEKRGWIELPARGTSMYPCIKKGDICRFVSTEAANIKKGDIILFHTPHGNLVAHRFCRLVTRNEQLHYLCKGDTNLAHDEAIAPEQLIGKMTWIRRKGRIIQVSSLPSYVWGQTVLSFPMISLLLRAYLNRRESTQA	151	2	WP_057305000.1; WP_057305125.1	0			1	WP_057305000.1	0		MTQYLRMNDYESIQLDMEWIILNTDEYNLTKLNGVGGFCWSLLGAAQTVSSISEAIRKEYESVDETVEEDIEAFLNDMIGRGLVQYAVS*	1		WP_057304998.1	MEENAKREQKLYARPMVLSQQPVRFETAQSWNKGHGNLNHPGTGNGGINYPNPPYTGPHNGNGGGNGKNK*	1	WP_057305125.1	MKYTIPLNVQIVQGEGNIVSDMDGEKVMLNIANGKYYNLGQIGGHIWELISAPISVEELVTALTKEFDVEQEVCEEQTKVFLNHLLEEKIIHVC*	WP_060645557.1	WP_060645555.1	Yes
1	WP_114383165.1 signal peptidase I [Paenibacillus prosopidis]	Bacteria	Bacillota	Bacillales	Paenibacillaceae	Paenibacillus	WP_114383165.1	MPANLTACYLIKEVIRKQGWVELPAEGTSMYPLIKQGNICRFVPCEAMKLKKGEIILFHTLSGSLVAHRLLSVESLNEQVTYRLKGDTNFGADEPVGQEQLIGKLTSINKGKYRIKLPSLSVHVWSQMILLFPILTVFLRAYLNRRCPNEIYTSSEKN	158	1	WP_114383163.1	0			1	WP_114383163.1	0		MASYIHKEKFEVLELDGESVILNADAFMVTTLNEVGSFCWSLLHEPCTIRQMIQTVQTHYAVEDESIEQDIEQFVTHLMDCGLIRHAS*	1		NA	MQKPAYHAPKVLKHQPIRFETSQSWNKGHGPVSGDPGKSNGDNYPHEPYNPKKDKK*	0					Yes	WP_114382496.1	WP_114382490.1
1	WP_121680124.1 hypothetical protein [Falsibacillus sp. GY 10110]	Bacteria	Bacillota	Bacillales	Bacillaceae	Falsibacillus	WP_121680124.1	MLVDQSTVLLLKDVIQKEGKIRLPASGSSMYPFIQQGDMCQFVYVQQHEWKKGDILLFFSESLRLVAHRYYGKHHDKLLFKGDSNLGFDPPIKPEQVIGKLSVIEKKGKHIEINVAAAQLWKNIILYFPMISSMLRFFINHRNI	144	1	WP_121680125.1	0			1	WP_121680125.1	0		MRRQYIRNDECEATQLNDEWLILNTNNFTVTKVNEVGGFCWNLLSEIQTISDLAYAVEKHFDGAGSNEKVRQELSEFMNELLKCELIHLVS*	1		WP_121680126.1	MENVRILRNSYEPPQICDHQNIRFETAQSWNKGHGNQNHHGNGNGGTNYPNDPYTGPHNGNGGGKGRP*	0					Yes	WP_121680143.1	WP_121680146.1
1	WP_079532988.1 MULTISPECIES: signal peptidase I [Bacillus]	Bacteria	Bacillota	Bacillales	Bacillaceae	Bacillus	WP_079532988.1	MQVSPQAIQVVKKVIGEHRWIELPAKGTSMYPYIKEGDICTFETCALPDLEKGDVILFHNVQGQLISHRFIKTTMIDGNRYLMCKGDTNFGFDEPILPQQVIGKLMYIKRRNIHSSASAWSAILWREAILRFPSLTHMLRVYVNRKAVRY	150	2	WP_079532989.1; WP_079532999.1	0			1	WP_079532989.1	0		MTERYVQRKKYEASQFDDEWIILNTDLYTVTKVNEVGGFCWSLLESAQTVDSIAAALAGHFNISEADETIIDDIKDFIMELHHYGLVEYAS*	1		WP_079532993.1	MMKSQVTYTKPEVLAHRPIQFETAQSWNKGHGNLDHPGTGNGGTHYPNDPYTDPRPKPWHGGGGGKPGGGNGKGRNK*	1	WP_079532999.1	MLKNYSLTLDQSITQRKGNIVSNMGGEKVMLSIENGKYYNLGEVGGDIWDTIENPVTITELVDTLMAKYEIDKETCLSHVLSFIEMLKDEELIKFN*	WP_079533002.1	WP_079532997.1	Yes
1	RBP03172.1 signal peptidase [Bacillus aquimaris]	Bacteria	Bacillota	Bacillales	Bacillaceae	Rossellomorea	RBP03172.1	MDKKGWMDVPAEGMSMYPLIKEGDVCRFISLKEVTVRKGDIILFQDSSGKLVAHRFLCIQFSENVGMYLFKGDTNVGFDVPISDEQMIGKLVKIRKGDVVLSLSHPIAKGWSKLILLFPVLSSFLQLILNKR	132	2	RBP03171.1; RBP03165.1	0			1	RBP03171.1	0		MTNYIRKGEYEVFELDDEWMILNSADFTVTVLNEVGGFCWSLLDSKCSVQEMIHAIQNQYDIKEMPIEEDVISFLSCLLQCGLVEKHAG*	1		RBP03169.1	MKKLTYKAPEVLNHKPITFETSQSWNKGRGPVSGDDGNSNGGNYPHDPYKPKKPHKNK*	1	RBP03165.1	MINSQTISVESIVGQVEGNIVSDMGGEKVMLSISNGKYYNLGEIGGVIWDAIQQPLSFSELIDNLLNEYQVDRETCEQQVLTFLEMLLEEEIILIRS*	RBP03162.1	RBP03166.1	Yes
1	WP_029196374.1 signal peptidase I [Paenibacillus alginolyticus]	Bacteria	Bacillota	Bacillales	Paenibacillaceae	Paenibacillus	WP_029196374.1	MQFHKEFVQIMTHAINKRGWIELPARGTSMYPFIKKGDICRFVSTQAANLKKGDVILFHTPHGNLVAHRFCRLVTRNEQLHYLCKGDTNLAHDEAIAQEQLIGKMTWIRRNGRIIHVSSLPSYVWGQIVLAFPMISQLLRGYLNRRESTQA	151	2	WP_029196375.1; WP_084160254.1	0			1	WP_029196375.1	0		MTQYLRMNDYESIQLDMEWIILNTDEYTLTKLNGVGGFCWSLLGAAQTVGSISEAIRKEYEFVNETVEEDIEAFLNDMIGRGLVQHAVS*	1		WP_029196377.1	MEENTKREQKLYARPMVLSQQPVRFETAQSWNKGKGNLNHPGTGNGGINYPNPPYTGPHNGNGGGNGNGKNK*	1	WP_084160254.1	MIKNQALSLQDIVVQGKGNIVSDMGGEKVMLSVQNGKYYNLGEIGGIIWDAIEEPIAVKQLVANLVADYEVDQSECEQQVISFLTHLMDEKLIGVENQWAI*	WP_029196372.1	WP_029196369.1	Yes
1	WP_044392127.1 hypothetical protein [Bacillus subterraneus]	Bacteria	Bacillota	Bacillales	Bacillaceae	Mesobacillus	WP_044392127.1	MLFDQETILFLKMAIDKDGFLELPADGNSMFPLIERGDVCRFVPCSRASFQRGDIILYHTGQGQLIAHRFIRQVANDCFFKGDTNLGYDKAVQFEQIIGKLMLIKKQRCEVSMNHSSVKRWGNLIMALPALSGMLRKYLNGKSHFAEMWSTLWRKVNSL	159	1	WP_044392128.1	0			1	WP_044392128.1	0		MVQFVQKKNVAQIEVENEWIILDTEQYTVTRLNDLGGFCWQKLREAQTVDSLYKAIDLEYGVECEKDAIDHFLADLTKYGLISHAV*	1		WP_044392130.1	MKKEKASISPLVLSHQPIKFETAHSWNKGRGNKNPKGDGDHGNHYPNEPRPGKPGPGPFPDKPWKNK*	0					Yes	WP_044394290.1	WP_044395365.1
1	WP_073711304.1 signal peptidase I [Domibacillus mangrovi]	Bacteria	Bacillota	Bacillales	Bacillaceae	Domibacillus	WP_073711304.1	MHTDSLIFNLIKEMMRKKGWMDLPADGVSMYPLIRKGDICRFVPCERSMIKKGDIILFQASGGGLVAHRLLKTISNHNQVDYLFKGDTNLGLDEPVSYEKIVGKLTSIQKGKRAIEATNVSVFLWCRLILFCPFMSVLLRTYLNNKEAKEL	151	2	WP_073711303.1; WP_073711297.1	0			1	WP_073711303.1	0		MTSYIRKEGYDTVELNDEWIILNSQEYTVTTLNEVGGYCWKLLHEKQTAKTIVQELKGEYDIDKESVQADIETFLSNLMQYGLIQYAH*	1		WP_073711301.1	MQKGIYCAPEVLDHRPVRFETAQSWNPGKGNLNHPGKGNGGINFPPGNPNPTPGGAGAPGKGNGKGRKK*	1	WP_073711297.1	MIKNQTISMNQLVSQGEGNIVSDMDGEKVMLSIHNGKYYNLGEIGGEIWDLLKEPISIQTLVTTLQVQYDVNQTDCVEQVTAFLNRLREEDLIKLSNRDHS*	WP_073711297.1	WP_073711298.1	Yes
1	WP_034765895.1 signal peptidase I [Bacillus vietnamensis]	Bacteria	Bacillota	Bacillales	Bacillaceae	Rossellomorea	WP_034765895.1	MLADQEAVHLISNVMKKHKWIDLPAQGTSMFPYIQDGDVCTFVTCSPAELQKGDTALYHTVQGKLVTHRFVKKQTINDDTFYMFKGDTNLGFDEPIRDQQVIGKLIYIKRRSKRISAGSVRCILWSKAILSLPYLSQWLRSYLNSRDTVRI	151	2	WP_051758543.1; WP_034765885.1	0			1	WP_051758543.1	0		MMTKFVKTKDYEASRFDDEWVILNTDQFTATKVNEVGGFCWGLLDDVQTVDSIAEEVKHHFKIVEDIESFKQDIDQFLRDLHHYGLVTYAG*	1		WP_034765892.1	MSHETRQYKTNNKPEVLSHQQIVFETAQSWNKGKGNLNHPGTGNGGVNYPNDPYTGPHHGNGGGNGKGKGKK*	1	WP_034765885.1	MINSQTISLESIVGQVEGNIVSDMGGEKVMLSISNGKYYNLGEIGGVIWDAIEKPLPIEELIDNLLNEYQVDRETCEQQVLSFLEMLLKEEIILIRS*	WP_034765876.1	WP_034765887.1	Yes
1	WP_119709684.1 signal peptidase I [Bacillus sp. Y1]	Bacteria	Bacillota	Bacillales	Bacillaceae	Bacillus	WP_119709684.1	MLFSQDIISVLQKTITNEGSISLPSEGNSMYPLIQQGDICRFTPFDSTSLKKGDILLFWASNGKLIAHRFYEMESENIYRCKGDTNLGFDEPIQKERILGTLVSIEKQKHVVQPSNLIVAGWSKLIITFPFLSFILRSYLNRRF	144	1	WP_119709685.1	0			1	WP_119709685.1	0		MTHYIQKESFDTTQLDGEWIILDAEHFTVTKLNEMGGFCWSLLKEKQTVGSIIQSIEAEFQGDLSVDAKDIEVFLKDLIEYGLVIHAV*	1		NA	MEKPLVLSHQPIRFETSQSWNKGHGPVSGDPGKSDGKKYPHDPFDPKKDHPNK*	0					No
1	WP_098590139.1 signal peptidase I [Bacillus megaterium]	Bacteria	Bacillota	Bacillales	Bacillaceae	Priestia	WP_098590139.1	MQANDKQGHILKALIDRNGSLELPAEGMSMYPLIKKGDICQFASIKHSPLRRGDIVLFESPANKLIAHRFLNCAYIQEEECYIFKGDTNYGLDDLITGEKIIGKLVAIQKKSVTIQEKNVAAVLWGKLILAFPILSVLLRKYINYQEWKKAD	152	2	WP_098590140.1; WP_098590145.1	0			1	WP_098590140.1	0		MTSYIQKGEYEVMEIDSEWVILNSHAYTVTTLNEVGGYCWKVIENKKTLAEIIEAVATHYSTESELIEADIQQFLNKLIDYGLVKQYAS*	1		WP_098590141.1	MQKKTYRAPEVLNHQPIRFETAQSWNPGKGNLDHSGTGNNGANWPSTNPNPTPGGAGAPGKGNGKNK*	1	WP_098590145.1	MIKSISMNQFVSQGEGNIVSDMDGEKVMLSIHNGKYYNLGELGGEIWEKIKEPVSIQNLVDALVAEYDVELATCKEQVISFLTLLFDEGLIKVEDEKAS*	WP_098590147.1	WP_098590144.1	Yes
1	WP_019383224.1 hypothetical protein [Bacillus oceanisediminis]	Bacteria	Bacillota	Bacillales	Bacillaceae	Cytobacillus	WP_019383224.1	MLFDEELIDLLKRTIQKEGCIDLPSEGDSMYPLIQKGEICRFIPCEPFLLTKGDITLFWAESGQIVVHRFYHEEMIQGFPHYVFKGDTNLGFDLPVSKDRIVGKLLYVQKASRKVNVEDLHAYAWGKLILAMPVLSGLLRKYLNKRKRPQF	151	1	WP_019383223.1	0			1	WP_019383223.1	0		MARHVQKSSYESTHLDNEWIILNTDDYTVTKLNDIGGFCWSLLEAEQTLESLTQAVGREYLETKVSEREIQEFLSQLMECGLVKYAV*	1		WP_019383221.1	MKTLDCHEKKENTRPMVLSHQPIRFETAHSWNKGVGNKNPNGNGNGGINYPNDPRPQKPGTGPGSGNGGGNGNGKGRGNN*	0					Yes	WP_019383191.1	WP_019383187.1
1	WP_121617671.1 signal peptidase I [Bacillus marisflavi]	Bacteria	Bacillota	Bacillales	Bacillaceae	Rossellomorea	WP_121617671.1	MEINNKTTDLIAKVLKKYDEIELPADGTSMYPFIREGDICTFTSCDPSSLKKGDVVLFKSQRGQLVAHRFIQTETIQRKHYYLFKGDTNLGFDDPVCEEDIIGKLAVVKRNNMKFSSSNITSNLWSKTILTFPIISYWLRLYINRRNTLQY	151	2	WP_121617672.1; WP_121617675.1	0			1	WP_121617672.1	0		MKQYVQSSNYETSQLDDEWIVLNTDHFTVTRLNEVGGFCWTLLQKPHSTRSLIESIRQEYATDGQQVHIEEIEGFLTELIQCGLVQYGN*	1		NA	MIKKRYERPLILDHRAIQFETQVSGLTIDDDDCSPEGVQVDFISSDFQNKDFSSLNTSTNQSTDNSCSPPNSGDPGTDPVGDPDDDNTDGPITEPEGDTPGDEGGTGDPINDNPTSPESPPHEGETPDDSNKPVTPDTPANGENTLTKPERGAGRDETVKTPDSTLIKDDIVTIDPDKNSFATDESWSNNSWSNDNAKQ*	1	WP_121617675.1	MITNQVLLSSVVEKTEGNIVSDMNGEKVMLSIEKGKYYNLGEIGGDIWGYIDSKRSILDIVTELLISYEIDQSQCEEQVLNFINSLVEEGLVVLK*	WP_121617680.1	WP_121617677.1	Yes
1	WP_023625795.1 MULTISPECIES: hypothetical protein [Bacillus]	Bacteria	Bacillota	Bacillales	Bacillaceae	Mesobacillus	WP_023625795.1	MLFDQETIRFLKVAIEKDGYLELPAHGNSMFPLIQRGDVCIFVPCSPGSLVKGDIVLFNTGEGQLIAHRFIRKEANLYIFKGDTNLGYDLPATPEQIIGKLSSIKKERHDISMQNSSARLWGNLIMALPVLSGILRKYLNWKTHYAEMWSTLWRKLNSL	159	1	WP_023625796.1	0			1	WP_023625796.1	0		MVQFIQKNSFEATQIEDEWIILDTDQYTVTRLNDLGGFCWLKLGEAQTVDSLHMAIDQEYGAECEKDAIDKFLVDLKKCGLIRHAV*	1		WP_023625798.1	MSNEKLEIRPVVLSHQPIQFETSQSWNRGRGPVADDKGKSDGKKYPHDPYDPKKKHKNKP*	0					Yes	WP_023625832.1	WP_020061970.1
1	WP_101665202.1 hypothetical protein [Bacillus sp. V33-4]	Bacteria	Bacillota	Bacillales	Bacillaceae	Bacillus	WP_101665202.1	MIFDKATIDLFKKTVSKDGFIDLPAQGNSMFPLIQTGDICRFVICDPWQLMKGEIVLYHSRTGRIIAHRFYEQKTMNYMRYYFLKGDTNLGFDQPINEYQIIGKLTFIQKAEKKISVANHAAALWGRLILKLPVISGMLRKYLNWKSHYQY	151	1	WP_101576445.1	0			1	WP_101576445.1	0		MNQYVHKNNYEATQLEDEWIILNTVDYTVTRLNETGGFCWTLLSEAQSVESLSDAIQQKFCPDSDTVKADVEAFLANLMECGLIHHDIR*	1		WP_101665203.1	MSEKIYLRPMVISHQAIKFETTVSGPNWDDDDDDWDDDRENDDDQGSDDEDDENDDRNGRRR*	0					No
1	WP_113884961.1 hypothetical protein [Bacillus firmus]	Bacteria	Bacillota	Bacillales	Bacillaceae	Cytobacillus	WP_113884961.1	MLFDEELIDLLKRTIQKEGCIDLPSEGDSMYPLIQKGEICRFIPCEPSLLTKGDITLFWAESGQLVVHRFYHEEMIQGFPHYVFKGDTNLGFDLPVSKDRIVGKLLYVQKASRKVNVEDLHAYAWGKLILAMPVLSGLLRKYLNKRKRPQF	151	1	WP_113884962.1	0			1	WP_113884962.1	0		MARYVQKSSYESTHLDNEWIILNTDDYTVTKLNDIGGFCWSLLEAEQTLESLTQAVGREYLETKVSEREIEEFLSQLMECGLVKYAV*	1		WP_113884964.1	MKTLDCHEKKENTRPMVLSHQPIRFETAHSWNKGVGNKNPNGNGNGGINYPNDPRPQKPGTGPGSGNGGGNGNGKGRGSN*	0					Yes	WP_113884988.1	WP_113884991.1; WP_019383187.1
1	WP_066067699.1 signal peptidase I [Bacillus soli]	Bacteria	Bacillota	Bacillales	Bacillaceae	Neobacillus	WP_066067699.1	MLIDNETVMLLKSVILKDGWLELPSMGNSMFPFIQQGNICRFAPFELSIIKKGDIILFHTPNGQLIAHRYYKKERMENKVQFFCKGDANLGFDQPIEYNQILGKLISVQKGRKKVSPDDQVSHLWGKMIIVFPALSFILRKYLNRNIHLQY	151	1	WP_066067700.1	0			1	WP_066067700.1	0		MSQYIQKGKYEATELEGEWIILNTEQYTVTRLNDVGGLCWSLLTEVQTSESLTRSLAKKYSSVKNDEQIKKDVEEFLINLVQCGLVQRVD*	1		WP_066067706.1	MILEKVYSRPIVLSHQPIQFETAQSWNKGHGNLDHPGKGNGGINYPNPPYTGPRPPDKKKKKGIILGG*	0					No
1	WP_101576446.1 hypothetical protein [Bacillus canaveralius]	Bacteria	Bacillota	Bacillales	Bacillaceae	Bacillus	WP_101576446.1	MIFDKATIDLFKKIVSKDGFIDLPAQGNSMFPLIQTGDICRFVICDPWQLMKGEIVLYHSRTGRIIAHRFYEQKTMNYMRYYFLKGDTNLGFDQPINEYQIIGKLTFIQKAEKKISVANHAAALWGRLILKLPVISGMLRKYLNWKSHYQY	151	1	WP_101576445.1	0			1	WP_101576445.1	0		MNQYVHKNNYEATQLEDEWIILNTVDYTVTRLNETGGFCWTLLSEAQSVESLSDAIQQKFCPDSDTVKADVEAFLANLMECGLIHHDIR*	1		WP_101576447.1	MSEKIYLRPMVISHQAIKFETTVSGPNWDDDDDDWDDDREDDDDQGSDDEDEDEDEDEDDDEDGDENDDRNGRRG*	0					No
1	WP_052333633.1 hypothetical protein [Paenibacillus pasadenensis]	Bacteria	Bacillota	Bacillales	Paenibacillaceae	Paenibacillus	WP_052333633.1	MELTSFGMSMYPLIREGDASRFVRVRARDLEVGDVCLFVSGSGILTGHRLVEIRGEGAGRQYVFRGDTSYVADDPVGPEAILGLWTGVRRARRGGGAGAARIAAAAAGAGAAKEAAADAAGARAAEGAGAAVGAGTARSAESEADADDARAAKGAVAAVGTAGAAPSGTGSRAAGFGGKWITPKHWQARLLRWLVLRYPLTRKFTRKLGTWSMSRKPMYRAASR	224	1	WP_028600625.1	0			1	WP_028600625.1	0		MTVLANQLLKRQESIETAELDGEWVLLDLESHSITKVNEMGGYIWELLEACPTISQLTERVASEYAADPLQVQADVEAYVAELIRVGLIVHE*	0				0					No
1	WP_066091276.1 signal peptidase I [Bacillus novalis]	Bacteria	Bacillota	Bacillales	Bacillaceae	Neobacillus	WP_066091276.1	MLIDHNTFTLLKSAIKKHGWLELPAYGNSMFPFIEQGNLCRFAPCEPFQLKKGDVILFYSQAGQLIAHRFVKIKRIDIQLLFLLKGDTNLCFDQPIGEDRILGKLDSIQKQHKKVTSDHFIAYIWGKVILTFPAFSVILRKYLNRKLKVQY	151	1	WP_066096889.1	0			1	WP_066096889.1	0		MTQYIQKGHYEATELDGEWIILNTDQYTITKLNDVGGHCWSLLNEMQTAASLTKSLLVKFSTIENEHQVKKDIEDFLANLVQCGLIEYVD*	1		WP_066091280.1	MILEKVYSRPIVLSHQPIRFETAQSWNPGKGNHDHPGTGNDGINFPPNPNPVPCGAGNPGNGNGNGNGNGNGNGNSGGIGQCNPKVKP*	0			WP_066091272.1		No
1	PLT44828.1 hypothetical protein B8V81_3259 [Paenibacillus pasadenensis]	Bacteria	Bacillota	Bacillales	Paenibacillaceae	Paenibacillus	PLT44828.1	MIQKRGAMELTSFGMSMYPLIREGDASRFVRVRARDLEVGDVCLFVSGSGILTGHRLVEIRGEGAGRQYVFRGDTSYVADDPVGPEAILGLWTGVRRARRGGGAGVARIAAAGAGAAKEAAADAAGARAAEGAGAAVGAGTARSAESEADADDARAAKGAVAAVGAGAARSAESEAYADGARAAKGAVAAVGAAGAAPSGTGSRAAEFGGKWITPKHWQARLLRWLVLHYPLTRKFTRKLGTWSMSRKPMYRAASR	256	1	PLT44827.1	0			1	PLT44827.1	0		MTVLANQLLKRQESIETAELDGEWVLLDLESHSITKVNEMGGYIWELLEACPTISQLTERVASEYAADPLQVQADVEAYVAELIRVGLIVHE*	3		PLT44823.1; PLT44824.1; PLT44825.1	MKAYNPPKVIMHEQVEFGTVNISNNFFYRWCKQFNFRPFICRLFYGSGSVGGGHGFNEPFSGIKGTPK*; MIKTYAAPRVLVHQAVEFGTVNISNNFFYQWCKCYNFKPFICRLFYGNIGPSGGKGFSAPLDHLEGWTPKK*; MKPYCAPAVLGHQSVEFGTVNISNNFFYKWCKSQNFAPFICRLFYGPGGPGGPCGCGTKPLGYLDRYDGAK*	0					No
1	WP_101808730.1 hypothetical protein [Paenibacillus pasadenensis]	Bacteria	Bacillota	Bacillales	Paenibacillaceae	Paenibacillus	WP_101808730.1	MNSPAGNLAPMVAALIQKRGAMELTSFGMSMYPLIREGDASRFVRVRARDLEVGDVCLFVSGSGILTGHRLVEIRGEGAGRQYVFRGDTSYVADDPVGPEAILGLWTGVRRARRGGGAGVARIAAAGAGAAKEAAADAAGARAAEGAGAAVGAGTARSAESEADADDARAAKGAVAAVGAGAARSAESEAYADGARAAKGAVAAVGAAGAAPSGTGSRAAEFGGKWITPKHWQARLLRWLVLHYPLTRKFTRKLGTWSMSRKPMYRAASR	270	1	WP_028600625.1	0			1	WP_028600625.1	0		MTVLANQLLKRQESIETAELDGEWVLLDLESHSITKVNEMGGYIWELLEACPTISQLTERVASEYAADPLQVQADVEAYVAELIRVGLIVHE*	3		WP_101808727.1; WP_101808728.1; WP_028600463.1	MKAYNPPKVIMHEQVEFGTVNISNNFFYRWCKQFNFRPFICRLFYGSGSVGGGHGFNEPFSGIKGTPK*; MLVHQAVEFGTVNISNNFFYQWCKCYNFKPFICRLFYGNIGPSGGKGFSAPLDHLEGWTPKK*; MKPYCAPAVLGHQSVEFGTVNISNNFFYKWCKSQNFAPFICRLFYGPGGPGGPCGCGTKPLGYLDRYDGAK*	0					No
1	WP_076359429.1 MULTISPECIES: hypothetical protein [Paenibacillus]	Bacteria	Bacillota	Bacillales	Paenibacillaceae	Paenibacillus	WP_076359429.1	MAPIVAALLRKRGSIELPSFGMSMYPLIQEGDVSRFVTTDVADLAVGDVCLFVNAYGIMTGHRLVAIGSEDGDDVFLFRGDTSFIPDDPVPAGAILAKWTGVRSGSGWKLDSGFRSRALRLLVLRIPLTRKVLRRLGNWSMSRKPLYRSTS	151	1	WP_083688678.1	0			1	WP_083688678.1	0		MPRGRREGACVQSLFSKKRCVLGADFMTISAGRILRRQESVESAEMDGEWVLLDLDSHSITKVNELGGYIWEQLEHHNTIERLIDRIASEYDVDREVARRDAEAFIAELIKVGLVTHG*	3		WP_076359425.1; WP_021877353.1; WP_076552942.1	MKAYNPPKVILHQSVEFGTINISNNFFYKWCKQFNFRPFICRLFYGSGSIGGANGIHTPFDGVKGTPK*; MKSYQSPRIIMHQAVEFGTVNISNNFFYEWCKCYNFKPFICRLFYGNIGPKGASGISTPLDFPEGWIPKK*; MSMKPYMAPAVLMHQTVEFGTVNISNNWFYKWCVSQGMKPFICKLFYGSNPGSPCGCSKPLGYLDRYDGPK*	0					No
1	WP_114380911.1 hypothetical protein [Paenibacillus prosopidis]	Bacteria	Bacillota	Bacillales	Paenibacillaceae	Paenibacillus	WP_114380911.1	MIERNELAVIIGKVIENRGSIDVTCYGNAMFPFLREGNMTTCVRVREEELSIGDVCLFGNNEGSLLLYRIIDINDEQQPALYILRGDTCDRPESPVPFTRIIGKLAAVHRDGKVIYAYHWKSRLLEVAVLQIPYWSKLLRWTAKRRFDRTLSYDTSMLDIDKNW	164	0		0			0		0			0				0					No
1	WP_127507125.1 signal peptidase I [Paenibacillus humicus]	Bacteria	Bacillota	Bacillales	Paenibacillaceae	Paenibacillus	WP_127507125.1	MAPIVAALLRKRGSIELPSFGMSMYPLIQEGDVSRFVTTDAAELAVGDVCLFVNAYGIMTGHRLVSIGSEDGDDVFLFRGDTSFIPDDPVPAGAILGKWTGVRSGTGWKPESGFRSRALRLLVLRIPLTRKVLRKLGNWSMSRKPLYRSTS	151	1	WP_083436233.1	0			1	WP_083436233.1	0		MPRGCREGACVQSLFSKKRCILGADFMTISAGRILRRQESVESAEMDGEWVLLDLDSHSITKVNEMGGYIWEQLEHHNTLGQLIDRIASEYDVDREVARRDAEVFIAELIRVGLVTHG*	2		WP_021877353.1; WP_021877354.1	MKSYQSPRIIMHQAVEFGTVNISNNFFYEWCKCYNFKPFICRLFYGNIGPKGASGISTPLDFPEGWIPKK*; MKPYMAPAVLMHQTVEFGTVNISNNWFYKWCVSQGMKPFICKLFYGSNPGNPPCGCSKPLGYLDRYDGPK*	0					No
1	WP_048744812.1 MULTISPECIES: hypothetical protein [Paenibacillus]	Bacteria	Bacillota	Bacillales	Paenibacillaceae	Paenibacillus	WP_048744812.1	MAPIVAALLRKRGSIELPSFGMSMYPLIQEGDVSRFVTTDAAELAVGDVCLFVNAYGIMTGHRLVSIGSEDGDDVFLFRGDTSFIPDDPVPAGAILGKWTGVRSGSGWKPESGFRSRALRLLVLRIPLTRKVLRKLGNWSMSRKPLYRSTS	151	1	WP_083436233.1	0			1	WP_083436233.1	0		MPRGCREGACVQSLFSKKRCILGADFMTISAGRILRRQESVESAEMDGEWVLLDLDSHSITKVNEMGGYIWEQLEHHNTLGQLIDRIASEYDVDREVARRDAEVFIAELIRVGLVTHG*	2		WP_021877353.1; NA	MKSYQSPRIIMHQAVEFGTVNISNNFFYEWCKCYNFKPFICRLFYGNIGPKGASGISTPLDFPEGWIPKK*; MRWMSMKPYMAPTVLMHQTVEFGTVNISNNWFYKWCVSQGMKPFICKLFYGSNPGNPPCGCSKPLGYLDRYDGPK*	0					No
1	WP_056641559.1 hypothetical protein [Paenibacillus sp. Soil522]	Bacteria	Bacillota	Bacillales	Paenibacillaceae	Paenibacillus	WP_056641559.1	MVRNELAVIIAKVIENRGSIDVTCYGDAMFPLLRDGNVTTFVRVREEELQIGDVCLFETNEGHLLLYRMIDIDDEQQPAMYTFRGDTCDIPQQPVTFSHIIGKLKAVHRDGKVLYVNHWRSRLLEAAVLQIPFWSKFSRWMANRRYDRASAI	152	0		0			0		0			0				0					Yes	WP_056635322.1	WP_056635331.1; WP_056635334.1
1	WP_090778863.1 hypothetical protein [Paenibacillaceae bacterium GAS479]	Bacteria	Bacillota	Bacillales	Paenibacillaceae		WP_090778863.1	MKMNNLDGNLAPMVAALLDKRGSMELTSFGMSMYPLIQEGDVSRFVRVRAQDLEVGDICLFVSSSGILTGHRLVEIRDEESRRQYVFRGDTSYIADEPVAGEAILGLWTGVKRKRSGSEKMTNGKRGSTGLGELAAGSEKIASGKRDVSTGIGVQAAGSGKKATRGGSGAIGELAADGAGARSIEPERDHWLTPKHWRARLIRLLMLHLPIARKFTRKLGNWSMSRKPMYRAQSR	235	1	WP_090778864.1	0			1	WP_090778864.1	0		MTVLTNQLLQRQEFIETAELDGEWVLLDLDSHSITKVNEMGGYIWELLENSQTISQLTDRIASEYDADRAQVQSDVEAYVAELIRVGLITHENE*	2		WP_090778870.1; WP_090778868.1	MSMKSYSSPKVISHQAVEFGTVNISNNFFYQWCKCYNFKPFICKLFYGDGNFKGGSGVSTPLGHLDGWTPKK*; MMKPYRAPAVISHQAVEFGTVNISNNFFYKWCKSQGFKPFICKLFYGDPGGPPCGCGPKPLGYLDRYDGTS*	0					No
1	WP_098626852.1 signal peptidase I [Bacillus aryabhattai]	Bacteria	Bacillota	Bacillales	Bacillaceae	Priestia	WP_098626852.1	MIAALLNSMQANDKQGHILKALIDRNGLLELPAEGTSMYPLIKRGDICRFTSIKHSPLKRGDIVLFESPANKLIAHRLLNCSYVQEEECYIFKGDTNYGVDDLVTREKIIGKLVVIQKKSVTIQEKNVAAVLWGKLILAFPLLSVLLRRYINYQEWKKAD	160	2	WP_098626851.1; WP_098626846.1	0			1	WP_098626851.1	0		MIKSISISQFVSQGEGNIVSDMDGEKVMLSIHNGKYYNLGELGGEIWEKIKEPVSIQNLVDELVAEYDVELDTCKEQVISFLALLLDEGLVKVEGEKAS*	1		WP_098626850.1	MQEKTYSAPEVLNHQPIRFETAQSWNPGKGNLDHPGKGNNGSNWPSTNPNPTPGGAGAPGKGKGKNK*	1	WP_098626846.1	MIKSISISQFVSQGEGNIVSDMDGEKVMLSIHNGKYYNLGELGGEIWEKIKEPVSIQNLVDELVAEYDVELDTCKEQVISFLALLLDEGLVKVEGEKAS*	WP_098626844.1	WP_098626847.1	Yes
1	WP_029192316.1 hypothetical protein [Paenibacillus harenae]	Bacteria	Bacillota	Bacillales	Paenibacillaceae	Paenibacillus	WP_029192316.1	MINRNELAVIVANVIKLQGTIDITCYGNDMFPLIREGNMSTFGRVREEELQIGDVCLFANNEGCLLLYRLIEIEVDGQQPAQYIFRGDACDKPEQPVTFSRIIGKLAAIHREGKIVYTNHWKSRLLETAVLQVPFWSKLSRWAALRRKDGTSTT	154	0		0			0		1	WP_028610131.1	MTLYIRNPSCEAIELDGETMILNPDGLTITQLSPVASYCWSLLSETHSAGSLSSAVRSHYEETDLAVEQDISLFLRELMECGLIAAAE*	0	1	WP_028610133.1	MIKPMYEKPVVLNHRPIQFETVVSGSGNFPGLGNGVDGVPAKERGDFPGQGATEGTFPGKGPTHNHRP*	0					Yes	WP_028611925.1	WP_028611922.1
1	WP_102709896.1 hypothetical protein [Paenibacillus castaneae]	Bacteria	Bacillota	Bacillales	Paenibacillaceae	Paenibacillus	WP_102709896.1	MVGRNELAVIIAKVIEIRGSIDVTCYGNAMYPFLREGNMSTFVRVQQDRLQIGDICLFESDAGRLLLYRIIDIDDDQQSVLYTFRGDTYDVPEKPVPFSQIIGKLTAVHRNGKIVYVDNWQSLLLEAAVLQIPFWTKFFRWIAKRQHNRTSAI	153	0		0			0		0			0				0					Yes	WP_102713874.1	WP_102713878.1
1	WP_110769698.1 hypothetical protein [Paenibacillus sp. OV191]	Bacteria	Bacillota	Bacillales	Paenibacillaceae	Paenibacillus	WP_110769698.1	MVRNELAVIIAKVIENRGSIDVTCYGDAMFPLLRDGNVTTFVRVREEELQIGDVCLFETNEGNLLFYRMIDIDDEQQPATYTFRGDTCDIPQQPVIFSQIIGKLKAVHRDGKVLYVNHWRSRLLEAAVLQIPFWSKFSRWMANRRYDRASTI	152	0		0			0		0			0				0					No
1	WP_053376054.1 hypothetical protein [Paenibacillus sp. FJAT-27812]	Bacteria	Bacillota	Bacillales	Paenibacillaceae	Paenibacillus	WP_053376054.1	MHDLTQVMSAVIQRTGKIELPSAGISMYPLIKEGNVNTFLPVQREELKLGDICLFVTDQGALIGHRLYAIKQYGSKELFIFKGDTCFEPDDPLPFTSILGRWSGVRRNSRFLAANHWRSRLLAVLALRLPKWHKVIRWCAERNERYT	147	1	WP_053376053.1	0			1	WP_053376053.1	0		MTILADQTLLRRENIETAELDGEWLLLNIDTHAITKVNELGGYIWSILPEYPTVAELAEKVRTEYDVEMEVVFDDVQAFVEMLIETGLLINA*	1		NA	MKKYEAPKVLTQHTVEFGTARPSDKVGGYEWCQKRNFKPMFCRHYIGG*	0					Yes	WP_053374684.1	WP_053374682.1
1	OBZ17943.1 hypothetical protein A7975_05000 [Bacillus sp. FJAT-26390]	Bacteria	Bacillota	Bacillales	Bacillaceae	Bacillus	OBZ17943.1	MSAVIQRTGKIELPSAGISMYPLIKEGNVSTFLPVQREELKLGDICLFVTDQGALIGHRLYATKQYGSKELFIFKGDTCFEPDDPLPFTSILGRWSGVRRNSRFLAANHWRSRLLAVLALRLPEWHKVIRWCAERNERYT	140	1	OBZ17243.1	0			1	OBZ17243.1	0		MTILADQTLLRRENIETAELDGEWLLLNIDTHAITKVNELGGFIWSILPEYPTVAELAEKVRTEYDVEMEVVLDDVQAFVEMLIEAGLLINA*	1		NA	MKKYEAPKILTQHTVEFGTARPSDKVGGYEWCQKRNFKPMFCRHYVGG*	0					Yes	OBZ12329.1	OBZ12327.1
1	WP_082197970.1 hypothetical protein [Bacillus sp. FJAT-26390]	Bacteria	Bacillota	Bacillales	Bacillaceae	Bacillus	WP_082197970.1	MHDLTQVMSAVIQRTGKIELPSAGISMYPLIKEGNVSTFLPVQREELKLGDICLFVTDQGALIGHRLYATKQYGSKELFIFKGDTCFEPDDPLPFTSILGRWSGVRRNSRFLAANHWRSRLLAVLALRLPEWHKVIRWCAERNERYT	147	1	WP_065384358.1	0			1	WP_065384358.1	0		MTILADQTLLRRENIETAELDGEWLLLNIDTHAITKVNELGGFIWSILPEYPTVAELAEKVRTEYDVEMEVVLDDVQAFVEMLIEAGLLINA*	1		NA	MKKYEAPKILTQHTVEFGTARPSDKVGGYEWCQKRNFKPMFCRHYVGG*	0					Yes	WP_053374684.2	WP_053374682.2
1	WP_036648127.1 hypothetical protein [Paenibacillus pini]	Bacteria	Bacillota	Bacillales	Paenibacillaceae	Paenibacillus	WP_036648127.1	MHDQAAAVSGWISRRGSIELPSYGTSMFPLIVEGDISEFMPVDSHNIRVGQVYLFVSNEGLLVGHRLLHVIQEEHENQYIFKGDTNIFPDTAVSLDQILGEWTSVQRKQRRRPRDHWQLRLLSWLALHIHEWPKLMRWYISVKKL	145	1	WP_036648124.1	0			1	WP_036648124.1	0		MSKIISSAVLRRQDKVETEQIEGEWILLDLSTHSVTKLNELGGMIWSLIPECQTIEEIVNRIQSEYQIEHHIVDQDVRLFIGDLMSAGLVSYA*	1		NA	MKTYEAPKVLVHQSVEFGTQRPSRHHHRGLSDDEE*	0					No
1	WP_076267722.1 hypothetical protein [Paenibacillus sp. FSL A5-0031]	Bacteria	Bacillota	Bacillales	Paenibacillaceae	Paenibacillus	WP_076267722.1	MHDLTQVMSAVIQRTGKIELPSAGISMYPLIKEGNVSTFLSMQREELKLGDICLFVTDQGALIGHRLYAVKQDGSKELFIFKGDTCYEPDDPVPFTSILGRWSGVRRNNHFQAANHWRSMLLAVLALRVPKWHKVIRWCAVKNERSM	147	1	WP_076267721.1	0			1	WP_076267721.1	0		MTILADQTLLRRENIETAELDGEWLLLNIDTHAITKVNELGGYIWSILPEFPTVAELAKKVHTEYGVEMEVVLDDVQAFVEMLIEAGLLINA*	1		NA	MKKYEAPKVLTQHTVEFGTARPSDKVGGYEWCQKRNFKPMFCRHFIGG*	0					Yes	WP_076267844.1	WP_076267846.1
1	WP_110769775.1 signal peptidase I [Paenibacillus sp. OV191]	Bacteria	Bacillota	Bacillales	Paenibacillaceae	Paenibacillus	WP_110769775.1	MNEWIAVLSAAIERTGKIELPSSGISMYPLIKEGNISTFLTVRREDLKVGDIYLFNTIQGSLTGHRLHAVKQDGGQEWFIFKGDTCFEPDDPVPFSSIIGRWAGVRRNSRFVPADHWESKLLAALAKYVPKWYKVSRWCAERKQR	145	1	WP_110769774.1	0			1	WP_110769774.1	0		MTILVNQKLLRQENIETAELDGEWLLLNIDTHGITKVNELGGYIWSILPEYPTVVQLAEKIHAEYGVEMEVVRADVEAFVKMLLEAGLLRNE*	1		NA	MKKYEAPKVLTQHTVEFGTARPSDKVGGYEWCQKRNFKPMFCRHYIGG*	0					No
1	WP_130030942.1 hypothetical protein [Sporolactobacillus sp. THM7-4]	Bacteria	Bacillota	Bacillales	Sporolactobacillaceae	Sporolactobacillus	WP_130030942.1	MNDFSDHDRSTSFFEALRRARENMHDNQVNSEKESGEKWVQTNKRAGEMKNGNKAADPEEPDPQLIARVREILPDRQFEIDRLVDSIKESPAAGWTITITFRDAQHEPAVTVQRISSKVTLQEQARFVPQTWRPASHPGGLDAHNPYRHLFDGDEPDRGRFDFYCLETAEDNSNRRITKKVAIAVREAMDRNGRATLYAYGKSMFPYIQQGDLCTFLARDADLLERGDIALYQLATGMLVAHRFLGRIQDSYGLKAYLFKGDSNLTADPPVHAGQIIGKMTRIDPAKRPFRLSHLFRKTWCRLHYSGVQIRSI	313	0		0			0		0			0		NA	NA	0					No
1	WP_113970198.1 signal peptidase I [Bacillus aquimaris]	Bacteria	Bacillota	Bacillales	Bacillaceae	Rossellomorea	WP_113970198.1	MQANSISSTLIKGVMDKKGWMDVPAEGMSMYPLIKEGDVCRFISLKEVTVRKGDIILFQDSSGKLVAHRFLCIQFSENVGMYLFKGDTNVGFDVPISDEQMIGKLVKIRKGDVVLSLSHPIAKGWSKLILLFPVLSSFLQLILNKR	146	2	WP_113970197.1; WP_113970192.1	0			1	WP_113970197.1	0		MTNYIRKGEYEVFELDDEWMILNSADFTVTVLNEVGGFCWSLLDSKCSVQEMIHAIQNQYDIKEMPIEEDVISFLSCLLQCGLVEKHAG*	1		NA	MKKLTYKAPEVLNHKPITFETSQSWNKGRGPVSGDDGNSNGGNYPHDPYKPKKPHKNK*	1	WP_113970192.1	MINSQTISVESIVGQVEGNIVSDMGGEKVMLSISNGKYYNLGEIGGVIWDAIQQPLSFSELIDNLLNEYQVDRETCEQQVLTFLEMLLEEEIILIRS*	WP_113970189.1	WP_113970193.1	Yes
1	WP_080836093.1 hypothetical protein [Cohnella sp. 6021052837]	Bacteria	Bacillota	Bacillales	Paenibacillaceae	Cohnella	WP_080836093.1	MLHEEKRIEVCKRFLELHGWIDIRSRGYSMFPYIREGDSCRFLALEKADRSACRPGDVLLFATGDGRLIGHRLHRVERAEHAYRYRLKGDTNLQYDEPIEDGQILGKLVWIRRGRRIRKASGFFAFVWSWSMVRFPILSWPLRKAALLASRKSAV	155	1	WP_080836088.1	0			1	WP_080836088.1	0		MTAAFERTEHAKSVVMDGEWMIVEAERGVVAQVNEVGGFVWECLEKQALDIGQLTEAVQARYEIGREAAERDVAFFFAAAGGNRFRSKQGMSS*	1		NA	MEKKPYEAPAVLQVVPIRFETAFSGPIGGIAPFQPERLRGVDYTIPFLPKSGDMGSH*	0					Yes	WP_080836059.1	WP_205428606.1
1	WP_068666658.1 signal peptidase I [Paenibacillus sp. 1ZS3-15]	Bacteria	Bacillota	Bacillales	Paenibacillaceae	Paenibacillus	WP_068666658.1	MLDDKGIDQIIVRTIEKKGWIDLPAQGMSMYPFIIKGDICRFVRIEASVMKVGDVLLFRAKHGHLIAHRLTQTVMNNQQPHYLCKGDTNVTHDEWIAQDQIIGTLIWINRHGRLIRMTNLASRMWSWAIRSLPLLSRLVQCLVRSQLAKS	150	2	WP_068666660.1; WP_068666648.1	0			1	WP_068666660.1	0		MTQYVRMNNYESIELDMEWIILNTDAYTLTKLNGVGGFCWSLLGTAQTIDMIAEAVRNEFQSVHTDVESEVEVFLHDMMDRGLVQLAG*	1		WP_068666664.1	MDNSSMKQKVYSPPMVLSQQPVRFETAQSWNKGHGNLNHPGKGNGGINYPNPPYTGPHKGKGNGKL*	1	WP_068666648.1	MISNQTIDLTQQVVQKDGHIVSDMGGEKVMLSIENGKYYNLGSVGGIIWDMIQEPIQVEHLVHKLMGEYNVERSVCEGQVVAFLEHMAKEGLILRIETGDVR*	WP_068666651.1	WP_068666644.1	Yes
1	WP_083486597.1 signal peptidase I [Alicyclobacillus ferrooxydans]	Bacteria	Bacillota	Bacillales	Alicyclobacillaceae	Alicyclobacillus	WP_083486597.1	MSLSATTNFGVTRLLKRRLQQFGCVQLTSHGVSMYPFIKAGDKCLFKAVEPNGLSEGDVILYRSVDDNLVGHRVVQIIHEQQEVLYLCKGDTNRYPDPPIPFGNVLARLVVVQRRQKAIYLDSHIRRLWSWAVLRIPLVSRAFRWTVIQQQIWRTRLQTLKTRS	164	3	WP_054971485.1; WP_054971480.1; WP_054971489.1	1	WP_054971489.1	MSCVYRWGAQVESVSVDEEWLVMDPENMSMTKLEDVAAFIWSRLQMPCTIDALVSRVVVEFDVSRAQAESDVVQFLNELQVMGLVERND	1	WP_054971485.1	0		MNLTQYYRWNENVEAIEMEGQWVILHAEHNTVTKLNETGGFIWSLLQKGQDVNLIVDTVTEKFGVNRLQAQTDVEAFLSQLEQVDVIVSDD*	1		NA	MRSKPYLAPCILSHTNLQFETHVSGCDDNGQGDDIHGHDHDHGLGLCHTSNPKD*	1	WP_054971480.1	MLVNSLPLNSKVAQKPGNIVTDMDGDKVMLSIEQGKYYNLGSIGGEIWDSMKEPVQIDAIITHLLNEYEVEVSVCKEHVLTFISNLLKEELVVIED*	WP_054971479.1	WP_054971481.1	Yes
1	WP_052087890.1 signal peptidase I [Paenibacillus wynnii]	Bacteria	Bacillota	Bacillales	Paenibacillaceae	Paenibacillus	WP_052087890.1	MKAEYYSAAICRAMDRLGFIELRSTGTSMFPFIHERDTCFFRSFEPTHVKPGDVLLFINDEGALVCHRVIKVNKEHNEAPAFIICKGDTNLLPDPPVPSGQVIGKLTHIRKRWLTLSPDNGLGRLWGKLIIGMPPFAYILHRVARLYRWRSNYLSTRP	158	1	WP_036651136.1	0			1	WP_036651136.1	0		MIISDKIKRKPGLDLTQMDGEWILLDADLCVVTRLNETGGRIVELLDQELTPGELAERLASEYEITLEQAQADLKRYLSTLSEAGLLDKRYEG*	1		NA	MAKKTYIAPAVLEQQEIVFETKISGQNNGLHNGNGNGNGNHSGGPNLGTNPGKGNK*	0					Yes	WP_052087990.1	WP_036650162.1
1	WP_100486950.1 hypothetical protein [Sporolactobacillus pectinivorans]	Bacteria	Bacillota	Bacillales	Sporolactobacillaceae	Sporolactobacillus	WP_100486950.1	MKMLDEHRRLSEKKIASAIRDELNRHGQMILTANGQSMFPYIQQSDICTFSRLEKDSALKRGCIVLYQNDSGRLIAHRYLRTNVSPDGWEYFLIKGDSNLYPDPPVAPGQLIGVLTGMKAAKHRLRISHLSDRAWCRMILDVPRLSWLINKYLNLRSRAKKKITIDFKRDFKRSKV	176	1	WP_100486951.1	0			1	WP_100486951.1	0		MESYYTRRRDCDTVEVDDEDSLMIINTDDSTVTHLNGTGSWCWSMLEERQNADSLAQSLLESQQKSDQSDTDFLELKKDIQAFLDKMVTCGLIENA*	1		NA	MEKTARNEAKSLRPLVLSHENIQFHADASTGSFGSKPSSCKN*	0					No
1	KPV39332.1 hypothetical protein AN477_22830 [Alicyclobacillus ferrooxydans]	Bacteria	Bacillota	Bacillales	Alicyclobacillaceae	Alicyclobacillus	KPV39332.1	MLKRRLQQFGCVQLTSHGVSMYPFIKAGDKCLFKAVEPNGLSEGDVILYRSVDDNLVGHRVVQIIHEQQEVLYLCKGDTNRYPDPPIPFGNVLARLVVVQRRQKAIYLDSHIRRLWSWAVLRIPLVSRAFRWTVIQQQIWRTRLQTLKTRS	151	3	KPV39331.1; KPV39326.1; KPV39334.1	1	KPV39334.1	MSCVYRWGAQVESVSVDEEWLVMDPENMSMTKLEDVAAFIWSRLQMPCTIDALVSRVVVEFDVSRAQAESDVVQFLNELQVMGLVERND	1	KPV39331.1	0		MNLTQYYRWNENVEAIEMEGQWVILHAEHNTVTKLNETGGFIWSLLQKGQDVNLIVDTVTEKFGVNRLQAQTDVEAFLSQLEQVDVIVSDD*	1		NA	MRSKPYLAPCILSHTNLQFETHVSGCDDNGQGDDIHGHDHDHGLGLCHTSNPKD*	1	KPV39326.1	MLVNSLPLNSKVAQKPGNIVTDMDGDKVMLSIEQGKYYNLGSIGGEIWDSMKEPVQIDAIITHLLNEYEVEVSVCKEHVLTFISNLLKEELVVIED*	KPV39325.1	KPV39327.1	Yes
1	WP_006037530.1 signal peptidase I [Paenibacillus curdlanolyticus]	Bacteria	Bacillota	Bacillales	Paenibacillaceae	Paenibacillus	WP_006037530.1	MHDIAPLVAGWIDQRGRIELPSFGISMYPLIQQGNVSTFVKVSSEELRIGDVCLFITQQELMVAHRLRAIVTKDGETQYIFKGDTSYANDDPVPYKRIIGRFVRVNRNGVWLTPDHWKFRIFSWLAMHMPKWPGLMNRYIRSRWGHA	147	1	WP_006037531.1	0			1	WP_006037531.1	0		MTKLQHQTLKRQENIETAELDGEWVLLNIETHSITKLNELGGSIWTLLEKYPTIPELTDQIVAEYGVDRTMVEQDIHLFVTELIGVGLLQYA*	1		WP_006037533.1	MKSYVAPRMLMHQSVEFGTTNISNSWFYKWCECWDFKPLICWVFHKPGHGGGPHGPSGPSFPGPGGGGPGGGGGNGHGH*	0					No
1	WP_051827126.1 hypothetical protein [Bacillus indicus]	Bacteria	Bacillota	Bacillales	Bacillaceae	Metabacillus	WP_051827126.1	MQVNETTIILLKRTIENQGWIELPSEGFSMYPFIRRGDVCRFGVFETVSKGEILLFHTAEGRLVAHRYYKKKEEHYFFKGDTNECMDSPVQKGQIIGKLISIKKKKLVVQMDRFFPKSYGFAVSSTHLTARFFRFLLRRKPGDDSYV	147	2	WP_035206555.1; WP_029280915.1	0			1	WP_035206555.1	0		MTITYKQAPDCETVEVDGEWIILHTENFTVTKLNESGGLCWSLLKEKTSAGALLKSIRPFSAHYTETDIQLFLDELTSCGLIEHASQ*	1		WP_029565752.1	MSTSNRPMVVSHQPIVFETAQSWNKGHGNLDHPGKGNGGVNYPNPPYTGPRHDNGGGKGKGKGN*	1	WP_029280915.1	MINTMKINMSSQVKQKEGNIVSRMNDEIVMMNIDKGNYYNLGTVGGEIWNKIEHECNVSEVVSHLTSIYEITKKKCEVEVIVFLNKLYNEDLVEIIKH		WP_051827190.1	Yes
1	WP_057312955.1 signal peptidase I [Paenibacillus sp. Soil766]	Bacteria	Bacillota	Bacillales	Paenibacillaceae	Paenibacillus	WP_057312955.1	MQDHKDIDQVIALTMEKRGWIDLPAQGMSMYPFIKKGDICRFIRVEASRLKKGDILLFRAGHGHLIAHRLSRIVMNNQQPHYLCKGDTNVTYDEWISQDQIIGRLIWKNRNGRLIQFTNLASSTWGWAILTLPQLSRLVQFYLVRSKLAKS	151	2	WP_057312954.1; WP_057312959.1	0			1	WP_057312954.1	0		MTQYVRMNNYESIELDVEWIILNTDEYTLTKLNGVGGFCWSLLGTAQTIDTIADAVRNEFQSVHSDVETDVELFLHDMMNRGLVQLAGS*	1		WP_057312952.1	MENESMKQKVYSPPMVLSQQPVRFETAQSWNKGHGNLKHPGKGNGGINYPNPPYTGPHNGKGNGKP*	1	WP_057312959.1	MITNQTLDITQEVVQKDGHIVSDMGGEKVMLSIENGKYYNLGSVGGIIWDLIQEPMKVEHLIDKLIEQYDVERSVCEGHVLSFLEHMVKEGLIHNKETGDVR*	WP_057312957.1	WP_057312961.1	Yes
1	WP_119148399.1 hypothetical protein [Cohnella sp. K2E09-144]	Bacteria	Bacillota	Bacillales	Paenibacillaceae	Cohnella	WP_119148399.1	MSDLLRADDIRQLIRSRGSLELPAHGKSMYPYLKEGQVCRFVPPSRLRVGEVILFVSRQGQLVGHRYHRELSPGCSPSILCKGDSNRNWDEPISPEQIVGRLAAVRNDNARVRRADSFVSFLWGRLIVAIPSLSFVIRLGMNIKKPR	147	0		0			0		0			0		NA	NA	0					Yes	WP_233567919.1	WP_158594101.1
1	WP_099330939.1 signal peptidase I [Bacillus aryabhattai]	Bacteria	Bacillota	Bacillales	Bacillaceae	Priestia	WP_099330939.1	MNSMQANDKQGHILKALIDRNGLLELPAEGTSMYPLIKRGDICRFTSIKHSPLKRGDIVLFESPANKLIAHRLLNCSYVQEEECYIFKGDTNYGVDDLVTREKIIGKLVVIQKKSVTIQEKNVAAVLWGKLILAFPLLSVLLRKYINYQEWKKAD	155	2	WP_099330938.1; WP_098590145.1	0			1	WP_099330938.1	0		MTSYIQKGGYEVMEVDSEWVVLNPQAYTVTTLNEVGGYCWKVIENKKTLAEIIKAVAAYYNTEAELIKGDIQHFLNKLMDCGLVEQYAS*	1		WP_098626850.1	MQEKTYSAPEVLNHQPIRFETAQSWNPGKGNLDHPGKGNNGSNWPSTNPNPTPGGAGAPGKGKGKNK*	1	WP_098590145.1	MIKSISMNQFVSQGEGNIVSDMDGEKVMLSIHNGKYYNLGELGGEIWEKIKEPVSIQNLVDALVAEYDVELATCKEQVISFLTLLFDEGLIKVEDEKAS*	WP_099330933.1	WP_099330935.1	Yes
1	WP_077623675.1 signal peptidase I [Sediminibacillus massiliensis]	Bacteria	Bacillota	Bacillales	Bacillaceae	Sediminibacillus	WP_077623675.1	MQVNAKTCLIIKEIIKKRGWVELPAQGTSMFPVIQEGDICRFVSCETKNLQKGDIILFQDSTGKLVTHRYVKSYEELNEQFYLFKGDTNLGLDAPIAKDKIIGKLFLIKKKKTVKKASSLSLVVWGAVIIRCPIVSGWLRSYLNKKTRKAVANL	154	2	WP_077623676.1; WP_077623681.1	0			1	WP_077623676.1	0		MTSYKCRQSFEKVELDGEWLVMNTDAYTVTTLNEVGSFCWDLLQEQQTLSEIVDAVKNKYAVQGEDVQHDVKSFVSNLIKCGLLEHAG*	1		NA	MKVYKKPEVLNHQTIMFETAQSWNRGKGNRDHKGNGNGGKNYPHPPYTGPRPKPWF*	1	WP_077623681.1	MINQQVIELDNVVVQTEGNIVSDMGGEKVMLSISNGKYYNLGEIGGEIWERIKEPVSVHSLVDSLIDQYEVEKNECRNHVTAFLCSLAGEGLVQVKS*	WP_077623683.1	WP_077623680.1	Yes
1	WP_026694389.1 hypothetical protein [Bacillus kribbensis]	Bacteria	Bacillota	Bacillales	Bacillaceae	Peribacillus	WP_026694389.1	MIAQAETVFMIKKVIGTEGLMELPAKGNSMYPLIREGNICTFEVCEIEKLKKGDIVLFLSPSGGLVAHRFVSYLEETGEYLFKGDTNLGMDAPVLQAQLLGRLVLIKKKQFPLRADHPMLWLWGKLVLSFPVISGLLRSFLNRRNPQHV	149	1	WP_035322923.1	0			1	WP_035322923.1	0		MTHRYIQNGSHEATEFDQEWIILNTENYTVTKLNDMGGFCWSLLSSNQTVDSLVEAVTKELDSVIPKERIEADIREFLSDLIECDLVAYDRAG*	1		WP_026694386.1	MSSAINKAKKTYQRPLVLTHQPIVFETAQSWNKGHGNLDHPGTGNGGTNYPNTPYTGPHNGNGGGNGKGNGKNK*	0					No
2	WP_114374396.1 signal peptidase I [Ruegeria sp. NKC1-1]	Bacteria	Bacillota	Bacillales	Bacillaceae	Salicibibacter	WP_114374396.1	MWHVTRKVISGFTTVLLFTLLVVTLFAVISSQAADGEPNIFGYELKTVLSGSMEPEIQTGSMIAIEPTENPTQFEQGDVITFTNPDDNLVTHRVHEVENDGEQYITKGDNNNSTDSEPVIAENIVGEYTGVTVPFVGYAFVFATSEQGAVLLLILPGVLLLAYSAFTIWRGLRQIEPSKKKEESVSPPRQE	191	0		0			0		ND			ND	ND			0					ND
2	WP_063190712.1 signal peptidase I [Bacillus marisflavi]	Bacteria	Bacillota	Bacillales	Bacillaceae	Rossellomorea	WP_063190712.1	MKRKRKGRNRLKKFLSNSITAILFIVFIGMMFIVISSMASGGEPQLFGKQLKTVLSGSMEPEFQTGSVIAVEPVQDAEALKKGDVISFVVPDGTMVTHRIADVTKNGDQTLFQIKGDNNKEADTEPVLAQNVVAKYTGFTIPYLGYFVDFAKSNNGMALLMIIPGVFLLGYSAFTIRSALKEIDQNQTKKELDKPA	196	0		0			0		ND			ND	ND			0					ND
2	WP_079514557.1 signal peptidase I [Bacillus marisflavi]	Bacteria	Bacillota	Bacillales	Bacillaceae	Rossellomorea	WP_079514557.1	MKRKRKGRNRLKKFLSNSITAILFIVFIGMMFIVISSMASGGEPQLFGKQLKTVLSGSMEPEFQTGSVIAVEPVQDAEALKKGDVISFVVPDGTMVTHRITEVTKNGDQTLFQTKGDNNKEADTEPVLSQNVVAKYTGFTIPYLGYFVDFAKSNKGMALLMIIPGVFLLGYSAFTIRSALKEIDQNQTKKELDKPA	196	0		0			0		ND			ND	ND			0					ND
2	WP_090235810.1 signal peptidase I [Lentibacillus halodurans]	Bacteria	Bacillota	Bacillales	Bacillaceae	Lentibacillus	WP_090235810.1	MSRQKILKVISRITTYLLFVLFIVTVFMVISFRASGGEADLFGYQFKSVLSGSMEPEIQTGSIISIELGGDMTRFEEGDVITYRTQDHMLITHRVVQEMEDGQQYMTKGDNNEEADSEPVLAQNVVGKYTGFTVPYVGYVMNFANTPQGAALLLILPGLFLVGYSVVTIWRVLGQVEGSKNKGAAEKH	188	0		0			0		ND			ND	ND			0					ND
2	WP_053429913.1 signal peptidase I [Bacillus marisflavi]	Bacteria	Bacillota	Bacillales	Bacillaceae	Rossellomorea	WP_053429913.1	MRKRKGRNRLKKFLSNSITAILFIVFIGMMFIVISSMASGGEPQLFGKQLKTVLSGSMEPEFQTGSVIAVEPVQDAEALKKGDVISFVVPDGTMVTHRITDVTKNGDQTLFQTKGDNNKEADTEPVLSQNVVAKYTGFTIPYLGYFVDFAKSNKGMALLMIIPGVFLLGYSAFTIRSALKEIDQNQTKKELDKPA	195	0		0			0		ND			ND	ND			0					ND
2	WP_056538690.1 signal peptidase I [Bacillus sp. Leaf406]	Bacteria	Bacillota	Bacillales	Bacillaceae	Bacillus	WP_056538690.1	MVKRKRKGRNRLKKFLSNSITAILFIVFIGMMFIVISSMASGGEPQLFGKQLKTVLSGSMEPEFQTGSVIAVEPVQDAEALKKGDVISFVVPDGTMVTHRITDVTKNGDQTLFQTKGDNNKEADTEPVLSQNVVAKYTGFTIPYLGYFVDFAKSNKGMALLMIIPGVFLLGYSAFTIRSALKEIDQNQTKKELDKPA	197	0		0			0		ND			ND	ND			0					ND
2	WP_048012421.1 signal peptidase I [Bacillus marisflavi]	Bacteria	Bacillota	Bacillales	Bacillaceae	Rossellomorea	WP_048012421.1	MKRKRKGRNRLKKFLSNSITAILFIVFIGMMFIVISSMASGGEPQLFGKQLKTVLSGSMEPEFQTGSVIAVEPVQDAEALKKGDVISFVVPDGTMVTHRITDVTKNGDQTLFQTKGDNNKEADTEPVLSQNVVAKYTGFTIPYLGYFVDFAKSNKGMALLMIIPGVFLLGYSAFTIRSALKEIDQNQTKKELDKPA	196	0		0			0		ND			ND	ND			0					ND
2	WP_048006533.1 signal peptidase I [Bacillus marisflavi]	Bacteria	Bacillota	Bacillales	Bacillaceae	Rossellomorea	WP_048006533.1	MRKRKERNRLKKFLSNSITAILFIVFIGMIFIVISSMASGGEPQLFGKQLKTVLSGSMEPEFQTGSVIAVEPVQDAEALKKGDVISFVVPDGTMVTHRITDVTKNGDQTLFQTKGDNNKEADTEPVLSQNVVAKYTGFTIPYLGYFVDFAKSNKGMALLMIIPGVFLLGYSAFTIRSALKEIDQNQTKKELDKPA	195	0		0			0		ND			ND	ND			0					ND
2	WP_068447497.1 signal peptidase I [Lentibacillus amyloliquefaciens]	Bacteria	Bacillota	Bacillales	Bacillaceae	Lentibacillus	WP_068447497.1	MKGKRVLKVMSHIITTLLFIVLLVTLFSVIAMRASGGEAAIFGHQLKSVLSGSMEPEIQTGSIIAIDVADAQNTFQKGDVITFQTNDDALVTHRITEVVDGQYVTKGDANDAPDVEPVTQESIIGEYTGFSIPYAGYVMTFANSSEGAAILLILPGVCLIIYSMITIWRALRTIDQPKKDVKKNIEQSDI	190	0		0			0		ND			ND	ND			0					ND
2	WP_042398492.1 MULTISPECIES: signal peptidase I [Geomicrobium]	Bacteria	Bacillota	Bacillales		Geomicrobium	WP_042398492.1	MLVLARIGKWTSSLITGMMFVLLLATLFTVITSHASEGEPSLFGYEIKTVLSGSMEPGIQTGSIIAIEQQEITTNFNRGDVVTFFGPEGVLVTHRVHEVIDNGQSYITKGDNNNAPDTSPVMAEDIVGKYTGFTVPFIGSVIMFATSELGAVLLLIVPGVLCVIYSIIIIFKALDQVDQMAKGNADVTPSVSTSEHETLHK	201	0		0			0		ND			ND	ND			0					ND
2	WP_010531666.1 signal peptidase I [Lentibacillus jeotgali]	Bacteria	Bacillota	Bacillales	Bacillaceae	Lentibacillus	WP_010531666.1	MMKKILNVINHITTFLLFAVLIVTVLLVISFRASGGEAAIFGYQFKTVLSGSMEPEIQTGSIISIEKGGDMKRFEKGDVITYRTPEDMLVTHRIAEVIGDGEQYITKGDNNEGADLDPILAQNVVGKYTGFTVPYIGYVMNFANTSQGAALMLILPGLLLVGYSGITIWRALRQFDDSKAAEKH	184	0		0			0		ND			ND	ND			0					ND
2	GAK12957.1 signal peptidase SipW [Geomicrobium sp. JCM 19039]	Bacteria	Bacillota	Bacillales		Geomicrobium	GAK12957.1	MLARIGKWTSSLITGMMFVLLLATLFTVITSHASEGEPSLFGYEIKTVLSGSMEPGIQTGSIIAIEQQEITTNFNRGDVVTFFGPEGVLVTHRVHEVIDNGQSYITKGDNNNAPDTSPVMAEDIVGKYTGFTVPFIGSVIMFATSELGAVLLLIVPGVLCVIYSIIIIFKALDQVDQMAKGNADVTPSVSTSEHETLHK	199	0		0			0		ND			ND	ND			0					ND
2	WP_114372191.1 signal peptidase I [Ruegeria sp. NKC1-1]	Bacteria	Bacillota	Bacillales	Bacillaceae	Salicibibacter	WP_114372191.1	MWRGMKKVISGVTTSVLFILLIVTVLAVISNQAADGEPNVFGYQLKTVLSGSMVPEFQTGSIIAIEPIEEPTQFEKGDVITYINPDDNLVTHRVHEVMNDDQQYITKGDNNNAADSEPVLAENVVGQYTGFTVPYAGYVANFATSPEGALFLLVVPGALLFGYSIIIISRALRQIETPDEKEPDSQ	186	0		0			0		ND			ND	ND			0					ND
3	WP_081701001.1 hypothetical protein [delta proteobacterium PSCGC 5342]	Bacteria					WP_081701001.1	MFPELITELLQDGYKVNFSAPGHSMYPTIMANETILVEPIDPGTVRMGDILLYRTSGRLVAHRVVRVNMPAGNRNSSNSNFDTPSSALSSQPSFTFRGDACPSCDAPVTADQILGKVVAIERNGYSVDPYSLTHKLGCLAHRWSSRIKGILN	152	0		0			0		ND			ND	ND			0					ND
3	OGL39603.1 signal peptidase I [Candidatus Schekmanbacteria bacterium GWA2_38_9]	Bacteria	Candidatus Schekmaniibacteriota				OGL39603.1	MQEKWFGSPAFRELSSEILRKGHVLRFQARGTSMHPFIKDKDIIKVKPVQPEKLKSGDVILYKTGYRGFVVHRLIKKQNKKKGEPLFVTKGDFCYTPDPAISSSDILGKVISIERNGKEISMENGMARLRNFLLSKASPFSFILYPIGRKVKKIGLAILKK	161	1	OGL39600.1	1	OGL39600.1	MDFLDCCYQKDQSVVSRKIADEIILVPIRKNVGDLESIYTLDEIGAKIWELVDGKRKMKEIKNVLLEEFDVTEEQVVSDMKDFIGQLEVMGGIKLIVEK*	0		ND			ND	ND			0					ND
3	RPJ14135.1 hypothetical protein EHM37_06275 [Deltaproteobacteria bacterium]	Bacteria	Myxococcota				RPJ14135.1	MLESLVIDSLKNGRSVRFRAPGCSMAPLIRSNDALIVEPVAPAEVSAGDIVLYRSGAGLTAHRVVGTPPPASKEGGGCFLLKGDAGSRPDPPVAASAVLGRVIAVERGGRRIDPYRFFPRLFAGLRRLASRLKSRLTNSRPLM	143	0		0			0		ND			ND	ND			0					ND
3	OLE53994.1 hypothetical protein AUG51_10245 [Acidobacteria bacterium 13_1_20CM_3_53_8]	Bacteria	Acidobacteriota				OLE53994.1	MFLELSTELLAEGYGVRFRAGGNSMHPTIRDGEAVKVEPVSALEIRRGDIILYSAGRGLTAHRVVRVDESNDGARVFHLRGDACASLDEPVAAEQTIGRVTEVERGGRIIALTGRAARLRQNARLIVAKLKESAIADKRL	140	1	OLE53998.1	1	OLE53998.1	MSSSEKSFVRDDELTTRVIAGETLVVPVRGRVGDLDSIYTLNEVASRIWQLIGEGFTVRRIVEIIGDEFEVESVEAERDVSELLASMEEAGLIRALKG*	0		ND			ND	ND			0					ND
3	PYP86427.1 signal peptidase I [Blastocatellia bacterium AA13]	Bacteria	Acidobacteriota				PYP86427.1	MSSALFNETCVDMLRDGYGVRFRAGGTSMHPTIRDGELITVESLSGCRFAIGDIILYRSERGVVAHRLMKIEKREKESVYILRGDAAYAPDEPVTEGRLLGRVIAVQRRGRTINLNRAASRTIQLLGRIAFRLKQKRLYRKDTIPAIFSTQTRITEGAGISGMCLAMTDSLHND	174	1	PYP86424.1	1	PYP86424.1	MLFNCGFKTTRGFTISTLYKRQEGIVTRSIAGETILVPVQNRVGALDSIYTLNDIGTVIWKALEAPSDIGCIASAIADEYEVPTEIAAGDVAEFLERLELTGLICRTEA*	0		ND			ND	ND			0					ND
3	OGO18571.1 hypothetical protein A2Z14_13090 [Chloroflexi bacterium RBG_16_48_8]	Bacteria	Chloroflexota				OGO18571.1	MAEIILSHTDFADLSTQILQQGTSLRFTAHGSSMSPFIRDGDVMTVEPVRVADLKVGDVVFYHTNGEMLAAHRVVCRHVEGDEIVLTMRGDSSLRYDEKVHAGRVLGRVVNVQRGKKVFHLNKGWMRVLPILWITSTPLRSILLRIAWRVRKVVAAFIS	159	0		0			0		ND			ND	ND			0					ND
3	OIN97958.1 signal peptidase I [Candidatus Desantisbacteria bacterium CG1_02_38_46]	Bacteria	Candidatus Desantisiibacteriota				OIN97958.1	MEKFKKDDVVELIKEIMDKGACLRFRTTVGASMHPFIRDGDILWVKPVNASEIKIGDVIFYRNSNGGITVHRLIKKISKNGKLSFLTKGDSVSGVDEIIYPEQVQGKVIIIEHNKWRIRIDRGPGRIVGFLWARISMFSPWVYYPFRKIKRLFLKIKVSLKRTCAKKIC	169	1	OIN97953.1	1	OIN97953.1	MKDKMSPGCSEYYLSRCYEKSSSIVSRKIDDEVILVPIRKNVGDLESIYTLNEVASRIWELIDGKRKVREIKEIIIEEFDVSPQEAEKDAVEFLQQLEKMGGIKTVE*	0		ND			ND	ND			0					ND
3	OFV81495.1 signal peptidase I [Acidobacteria bacterium RBG_13_68_16]	Bacteria	Acidobacteriota				OFV81495.1	MSGGSVGARGSLDPTDARFVDVVSDLLRRGHSVRFRAKGGSMHPTIREGEAITVAPARPDAIKRGDVVLYRSGRGVIAHRVTRVVRDPDGTLAFIPRGDSSTTRDEPVDQSAVLGRVVAVERDGRELDPTGAGAWALAVLRATAARPVRWLRARLRGA	158	0		0			0		ND			ND	ND			0					ND
4	WP_014904871.1 peptidase S24 [Desulfosporosinus meridiei]	Bacteria	Bacillota	Eubacteriales	Desulfitobacteriaceae	Desulfosporosinus	WP_014904871.1	MFPIKTIKAAGMLPLISGILELGQNARITVSGNSMYPFLREGIDSVELTKGSFEKLSKGDIAIVHRTDGHYVMHRIIRKDKNCFFMVGDAQQWIEGPLYPYQVVAMVTAIWRKDNRIACQDFRWIVLSRVWLYLRPFRGFILRFQRKLIQG	151	1	WP_014904871.1	1	WP_014904871.1	MKVRDGFMLHEVAGQWVIVPLGERVVKFNGIMMLSESGSLLWKLLEKDASAEELVQALLTEYCIDAETAQRDVQEFIEDIREKELIE*	0		ND			ND	ND			0					ND
4	WP_052168594.1 hypothetical protein [Dehalobacter sp. CF]	Bacteria	Bacillota	Eubacteriales	Desulfitobacteriaceae	Dehalobacter	WP_052168594.1	MSEKTINRNFIPAIVWSNALLPILAEGHLLRLPIEGLSMYPLLVGRRDEVLLADVKGKKLRRGDIVLYVRQDGTHVLHRIHHVDLNNYYMFGDAQTWIEGPINEDNVLGVVISVIRKGKAIECNSFGYRFISQIWMVMRPARPLILKIIDRIPIIVKILNIILRPIHSK	169	1	SCH01659.1	1	SCH01659.1	MKIKEGYLVREIADCYIVVPVGERVIEFKGIMTLNDTGNFIWRCLTEDISYNQLLTSILDEYEIDEVTAKADLDDFIQSARESGVLEE*	0		ND			ND	ND			0					ND
4	WP_025205879.1 hypothetical protein [Dehalobacter restrictus]	Bacteria	Bacillota	Eubacteriales	Desulfitobacteriaceae	Dehalobacter	WP_025205879.1	MPEKTINRNFIPAIVWSNALLPILAEGHLLRLPIEGLSMYPLLVGRRDEVLLADVTGKKLRRGDIVLYVRQDGTHVLHRIHHVNLNNYYMFGDAQTWIEGPINQDNVLGVAISVIRKGKTIECNSFGYRFISQIWMVMRPARPLILKIIDRIPIIVKILNIILRPIHSK	169	1	WP_015045202.1	1	WP_015045202.1	MKIKEGYLVREIADCYIVVPVGERVIEFKGIMTLNDTGNFIWRCLTEDISYNQLLTSILDEYEIDEVTAKADLDDFIQSARESGVLEE*	0		ND			ND	ND			0					ND
4	AHF10357.1 hypothetical protein DEHRE_09925 [Dehalobacter restrictus DSM 9455]	Bacteria	Bacillota	Eubacteriales	Desulfitobacteriaceae	Dehalobacter	AHF10357.1	MLAEGHLLRLPIEGLSMYPLLVGRRDEVLLADVTGKKLRRGDIVLYVRQDGTHVLHRIHHVNLNNYYMFGDAQTWIEGPINQDNVLGVAISVIRKGKTIECNSFGYRFISQIWMVMRPARPLILKIIDRIPIIVKILNIILRPIHSK	147	1	AHF10360.1	1	AHF10360.1	MKIKEGYLVREIADCYIVVPVGERVIEFKGIMTLNDTGNFIWRCLTEDISYNQLLTSILDEYEIDEVTAKADLDDFIQSARESGVLEE*	0		ND			ND	ND			0					ND
4	WP_041225767.1 peptidase S24 [Dehalobacter sp. CF]	Bacteria	Bacillota	Eubacteriales	Desulfitobacteriaceae	Dehalobacter	WP_041225767.1	MHEVKRVSAAGLFSFVSELIKQGQTAKIPVSGNSMYPFLRDGIDSVEFTKGSFDQIKKGDIVLIQRTNGYYVMHRVFRKYKDCFYMVGDAQQWIEGPLFPEQLVAIVNTIWRKEKRILCSNTWLRILTKIWLILRPFRYFIFKVYRKVRKIFSFHSKE	158	1	WP_015045167.1	1	WP_015045167.1	MKIKEGFMLREVAGQWIVVPLGERVVEFSGIMTLSESGAELWRKMEQSTTQKELIDTILSEYNVDEETAKEDVLEFVNKLKDKNLIEE*	0		ND			ND	ND			0					ND
4	WP_073589069.1 S26 family signal peptidase [Anaerocolumna xylanovorans]	Bacteria	Bacillota	Lachnospirales	Lachnospiraceae	Anaerocolumna	WP_073589069.1	MSEIKKVKAVSMMPAINNLLKEGKGVRITVTGNSMYPFLRDKKDCVELYKTSFDRIKAGDIILVQRKEGGYVLHRVLLKLKKSVYILGDAQRRMEGPIYGNQILAKAEVIFRGDKKIAGDSLLIRKLSLLWTLVLPFRGIIMKSYRRLRNL	151	1	WP_073589066.1	1	WP_073589066.1	MKIKEGFLLREIAGSFVVVPIGQRVIDFNGLMSLNESGALLWSRLEKGVESINELVGLLCGNYLVEEEKAREDIEAFINKITERGLMEDGNELGAIKCTADNELV*	0		ND			ND	ND			0					ND
6	WP_070066131.1 signal peptidase I [Candidatus Brocadia sapporoensis]	Bacteria	Planctomycetota	Candidatus Brocadiales	Candidatus Brocadiaceae	Candidatus Brocadia	WP_070066131.1	MSQDLDINDTMQNPVQKKIQDNVLEIALDLCRRTKGQQYIPITGHSMYPLIREGDQILVLLGWTGIQRGDVIVFRREGMLIAHRVMNIDKTDAGHVLITKGDNVPYFDPPLNDNQIIGRVLAVKRGSRQAPLNTVVWRALGWLIVVGTLSFSQLLSYGMNLRQKYFGLHFSRTTSFIHRGIRAFSRTIRKGLTLFFL	197	0		0			0		ND			ND	ND			0					ND
6	RZV58771.1 signal peptidase I [Candidatus Brocadia sp. BROELEC01]	Bacteria	Planctomycetota	Candidatus Brocadiales	Candidatus Brocadiaceae	Candidatus Brocadia	RZV58771.1	MSQDQDINDTMQNPVQKKIQDNVLEIALDLCRRTKGQRYIPITGHSMYPLIREGDQVLVLLGWTGIQRGDVIVFRREGVLIAHRVMSIDKTDAGHVLITKGDNVPYFDPPLNDNQIVGRVLAVKRGSRQAPLNTAVWRTLGWLIVVGTLSFSQLLSYGVNLRQKHFGLHFSRTTSFIHRGIRAFSRTIRKGLTLFFL	197	0		0			0		ND			ND	ND			0					ND
6	OQZ02316.1 signal peptidase I [Candidatus Brocadia sp. UTAMX1]	Bacteria	Planctomycetota	Candidatus Brocadiales	Candidatus Brocadiaceae	Candidatus Brocadia	OQZ02316.1	MSQDQDINDTMQNPVQKKIQDNVLEIALDLCRRTKGQRYIPITGHSMYPLIREGDQVLVLLGWTGIQRGDVIVFRREGVLIAHRVMSIDKTDAGHVLITKGDNVPYFDPPLNDNQIVGRVLAVKRGSRQAPLNTAVWRALGWLIVVGTLSFSQLLSYGMNLRQKHFGLHFSRTTSFIHRGIRAFSRTIRKGLTLFFL	197	1	OQZ02319.1	1	OQZ02319.1	MIQDNTIDTTKPLRKSDIAIRCVDNEAILYREGEKRIHILNPTARLVWELCDGAHTVEDMEKTMRANFSIADGRDVMKDIRQTIDEFACKGVLEGKKR*	0		ND			ND	ND			0					ND
6	CAJ74028.1 unknown protein [Candidatus Kuenenia stuttgartiensis]	Bacteria	Planctomycetota	Candidatus Brocadiales	Candidatus Brocadiaceae	Candidatus Kuenenia	CAJ74028.1	MMQKENHNNISGEVLHAIVNVWDQTNEMFTIPIVGRSMYPLIREGDNVLVECGYSQIRRGDIIAFRSENKLIVHRVLTISEKGTGFSFITKGDNVPHADPVVSHREIIGKVSAIKRGEKMLSLDTFAGRSTGWLIVRSTPVVRVLCGFQRNIFTGNKQDRNKTVVNRGTRFLFLLFRKVIFFFMQRKSARK	191	1	CAJ74029.1	1	CAJ74029.1	MDIQTLNSIKSKFVARQVADELVIVPLSGNVAQMNELFTLNETAKIIWENIGENQTIATLKNLLTETFDVDDATAEQDILKFLEQMDVLQKYLN*	0		ND			ND	ND			0					ND
6	WP_099324214.1 signal peptidase I [Candidatus Kuenenia stuttgartiensis]	Bacteria	Planctomycetota	Candidatus Brocadiales	Candidatus Brocadiaceae	Candidatus Kuenenia	WP_099324214.1	MMQKENHNNISGEVLHAIVNVWDQTNEMFTIPIVGRSMYPLIREGDNVLVECGYSQIRRGDIIAFRSENKLIVHRVLTISEKGTGFSFITKGDNVPHADPVVSHSEIIGKVSAIKRGEKMLSLDTFAGRSTGWLIIRSTPVVRALCGFQRNIFTGNKQDCNKTIVNRGTRFLFLLFRKVIFLFLCRGKAPENKSIFINRRLI	202	1	WP_099324213.1	1	WP_099324213.1	MNFSKPKKKQKGVIIQDIGKEVVLRNVDEKTIHVLNTTARIIWELCDGEHTIGDMERQLRETFSIPDDTNICNDIVNTLTVLAEKGMLEEL*	0		ND			ND	ND			0					ND
5	OYT37669.1 signal peptidase I [Desulfurococcales archaeon ex4484_58]	Archaea	Thermoproteota	Desulfurococcales			OYT37669.1	MLGKLRKKESIIKILGLLLVIIIGLNMKNILAIVTGSETPIAVVRGYSMYPLLREGDLVFAYKPKPEDIHVGDIIIYKGLRGNLVIHRVIKIRVINGKYYYVTKGDNNLLPDYLEFTGPDKAGIPYDRVEGLVISINNSTLKIPYIGYLSIWYHSRR	157	0		0			0		ND			ND	ND			0					ND
5	RLG87798.1 signal peptidase I [Thermoprotei archaeon]	Archaea	Thermoproteota				RLG87798.1	MNIGKINKLEIIKILVIISFLLIALNIKSILLYTTGSDTPIAVVKGYSMFPLLREGDIVFAYKPAPNDIHVGDIIIYKSIDGKLIIHRVIKVVIEDNRYYYVTKGDNNPIPDYPEFRGPGVPYERVEGVVIKINNATFKIPYLGYLSLWFHGG	153	0		0			0		ND			ND	ND			0					ND
5	WP_014766878.1 signal peptidase I [Desulfurococcus amylolyticus]	Archaea	Thermoproteota	Desulfurococcales	Desulfurococcaceae	Desulfurococcus	WP_014766878.1	MNLSYSRILYYMTVIVFAAMLLTLIALIVLPIILNGFSPLAVVKGYSMLPTLREGDIVIVQRTTPEAIRPGDVIIYSTGGKLIIHRVIKVVIRDGEYYYVTKGDNNSLPDFMYFENNIGIPYNRVLGKVVSINGYIVKIPYLGYLALFLKGG	152	0		0			0		ND			ND	ND			0					ND
5	WP_012609104.1 signal peptidase I [Desulfurococcus amylolyticus]	Archaea	Thermoproteota	Desulfurococcales	Desulfurococcaceae	Desulfurococcus	WP_012609104.1	MNLSYSRILYYTTVIVFTAMLLTLIALVALPIILNGFSPLAVVKGYSMLPTLREGDIVIVQKATPEAIRPGDVIIYSTGGKLIIHRVIKVVIRDGEYYYVTKGDNNSLPDFMYFENNIGIPYNRVLGKVVSINDYIVKIPYLGYLALFLKGG	152	0		0			0		ND			ND	ND			0					ND
5	PNV81364.1 signal peptidase I [Fervidicoccus sp.]	Archaea	Thermoproteota	Fervidicoccales	Fervidicoccaceae	Fervidicoccus	PNV81364.1	MSNISKKDVITIAIFLALIILIRPALALATGTETPIAVVRGNSMLPLLREGDIVFLHHATPQEIRIGDIIVYKSVNDGYIIHRVVKIVNTSNGIFYVTKGDNNPVDDSILGQFINGPGISYDRVVGIVWSPMNETFVIPIIGIISLII	148	0		0			0		ND			ND	ND			0					ND
7	OLE64628.1 hypothetical protein AUG03_08685 [Acidobacteria bacterium 13_1_20CM_2_68_14]	Bacteria	Acidobacteriota				OLE64628.1	MNATRPRPVTAEDLSTAAVEREALPVLDALLSDGHGLLVPVRGRSMLPALREGDVAVIAPFLGLPRLGQMVLARGAPDLLLVHRLVDVEMQSGRRVYRLQGDNEMAPDAGVLREDLLGRVIGVVRDGRRLSADEPAFDPPAGAGRRALARRARKALRALVLLVTAFLCALGVVAAQEGTAAVTAQEEAIAPTADYRFGPTARRSCQSWGSARCRSRAGRSSSSRRTSRPVSTPSTRRPTSSS	242	0		0			0		ND			ND	ND			0					ND
7	PYT37480.1 hypothetical protein DMF52_02030 [Acidobacteria bacterium]	Bacteria	Acidobacteriota				PYT37480.1	MNATRPRPVTAEDLSTAAVEREALPVLDALLSDGHGLLVPVRGRSMLPALREGDVAVIAPFLGLPRLGQMVLARGAPDLLLVHRLVDVEMQSGRRVYRLQGDNEMAPDAGVLREDLLGRVIAVVRDGRRLSADEPAFDPPAGAGRRALARRARKALRALVLLVTAFLCALGVVAAQEGTAAVTAQEEAIAPTADYRFGPGDVLSLRIWNGQKIDELKLTVQSDGEAFLPVMGIGSLPVAGRTVVELKKDLEARFHTIYKETYVELLISKYAGHRVSLMGEVKTTARAESGPGNWALEGPTRLVGFLSAHGGPSQEADVMRIQLIRQGGPRRELNLFRAVFQGEESDDPWLRNGDLIFIPSLSMGNRKVFVLGEVAQPGVVNILDKMGLVEAISRAGGFT…	482	1	PYT37485.1	1	PYT37485.1	MIDDVDMLTEPLLPSPDVVARRVAGEYLLVPVRSGAAQMDFIFTANEIGSAIFRQLDGSRDGRAIARQLTREFDVDEERAQRDVVEFLRALCEAQLARPSRAAEKR*	0		ND			ND	ND			0					ND
7	OLD66742.1 hypothetical protein AUI52_02740 [Acidobacteria bacterium 13_1_40CM_2_68_10]	Bacteria	Acidobacteriota				OLD66742.1	MNATRPRPVTAEDLSTAAVEREALPVLDALLSDGHGLLVPVRGRSMLPALREGDVAVIAPFLGLPRLGQMVLARGAPDLLLVHRLVDVEMQSGRRVYRLQGDNEMAPDAGVLREDLLGRVIAVVRDGRRLSADEPAFDPPAGAGRRALARRARKALRALVLLVTALLCALGVVAAQEGTAAVTAQEEAIAPTADYRFGPGDVLSLRIWNGQKIDELKLTVQSDGEAFLPVMGIGSLPVAGRTVVELKKDLEARFHTIYKETYVELLISKYAGHRVSLMGEVKITARAESGPGNWALEGPTRLVGFLSAHGGPSQEADVMRIQLIRQGGPRRELNLFRAVFQGEESDDPWLRNGDLIFIPSLSMGNRKVFVLGEVAQPGVVNILDKMGLVEAISRAGGFT…	482	0		0			0		ND			ND	ND			0					ND
8	WP_013444635.1 signal peptidase I [Paludibacter propionicigenes]	Bacteria	Bacteroidota	Bacteroidales	Paludibacteraceae	Paludibacter	WP_013444635.1	MKQQELNKQLLDFAETLLDENHQLSFRMSGNSMYPALKAGDIGFVQKCDEKDLNKGDIIVFNQNGRLVAHRLIGMFTRDDIQFIIAKGDKNSYTDNPITIESLIGKVYSFQRGNKKKKIDSTKMKLNKFVALHFSTPIIPFYNFRLQAGKRFNLLWSELKSIKNNISIVSKESEKILFVNIIISILQGVLPFIIIVCIKTLIDQLTSISTQNESQRLYFTVILIITALVFLASGVLSELKTYFSLKLSQSITHQIYQKLHWKHASLDLSRYESPAEQDKIHRAVQEASFRPIKIVSEMLIGIKSVAAALFLVGLFITIKWHLIVILIIAIIPGVYFRLKSSRKLYKQKEAQSTKEREMYYFNRILTGLPFAKEMKLFGFFDFFKQHFSNVQNMLFEQQI…	747	1	WP_013444633.1	1	WP_013444633.1	MDIETLYKLKSRFATLSIGSELILVPITANVAKMNELFTLNETGKFIWENIKENTTVLDLENSMIETFSVDNITAKRDIDLFLNKLATIFGQ*	0		ND			ND	ND			0					ND
8	OIP81682.1 hypothetical protein AUK44_09495 [Porphyromonadaceae bacterium CG2_30_38_12]	Bacteria	Bacteroidota	Bacteroidales	Porphyromonadaceae		OIP81682.1	MNKSDANSSLLDFAETLLDDKLTLEIRMQGYSMFPTLKGGEIAYIQKCLPEDVKRGDILVFRHRGKFIAHRLMSIDKKLQTFTAKGDNNKHFDSTFHFSDLTGIVKTIKRTNGEKKINSFGMEVRKQLTITFPTITTALNNIHLQFSNRIINSKSTLKKLIKNIQLATETASRLVTFNALLSVLQGVMPFVLIVCMKALTDFLTPTATNEPTNEYQFMGLLSLTAFVYLTIGVLTEIRNLYGERLTQKVLQNIYGKVQQKHIELALSHLENPKSLDKIHRAVQESSYRPIKFINEIFTLLKSIASSIFLAGIFLSIKWYLVVVLIIAVIPVVLIRLKFARKFHRMKDTHSTPEREMYYYNRILTGFPFAKELKLFGFATFFRSRFDKLQKRLFSEKLQL…	743	1	OIP81680.1	1	OIP81680.1	MDIQTLNSIKSKFVARQVADELVIVPLSGNVAQMNELFTLNETAKIIWENIGENQTIATLKNLLTETFDVDDATAEQDILKFLEQMDVLQKYLN*	0		ND			ND	ND			0					ND
9	SCH01704.1 signal peptidase I [uncultured Ruminococcus sp.]	Bacteria	Bacillota	Eubacteriales	Oscillospiraceae	Ruminococcus	SCH01704.1	MSALSGKMVTDMKKQEIKLEQMESTIRKVLTAGGSFSFYPRGTSMQPFIVQGRDKVTLAALPDRIKKYDIILYKRENGTFVLHRVTGKKENAYIFRGDNQFSDEYGIKREQMIGRVTEIIRGDEVIPVNDIKHRMWAGFWVNTVFFRRVKRFCLKCRKKKQNLDKNKSC	169	1	SCH01659.1	1	SCH01659.1	MKIKGDYLLDTIGGEKMAVPITVNDGGLAGLIRLNEVGAFLWEKLQGGTTEADLVKALTSEYDVKEEKATADVKKFLEKLRTKGLLEE*	0		ND			ND	ND			0					ND
9	CDA64014.1 putative uncharacterized protein [Firmicutes bacterium CAG:56]	Bacteria	Bacillota				CDA64014.1	MQMQEIKLEEIEPTIRKIFAAGGDFTFYPKGTSMHPFVEQGRDKITLAPIQDQVRKYDVILYKRKNGAFVLHRVVGKRADGYIFRGDNQFVKEYGIKKEQMIGRMTEIIRSDEVIRVDDVKHRLWAMLXXXPAVGNALGTYGIAQKDPKSLS	152	1	CDA64013.1	1	CDA64013.1	MLDTIGGEKIAVPLGAGENNQTGLIRLNEVGAFLWEKLMEGTTEEDLVQDVTKQYEVGTEKAAGDVKKFLEKLKSQGLLED*	0		ND			ND	ND			0					ND
10	OFX61806.1 signal peptidase I [Bacteroidetes bacterium GWA2_30_7]	Bacteria	Bacteroidota				OFX61806.1	MSILVNNHNSKYSKTLLDTLKNELSAGTTVNIKLGGFSMWPFIKSGTIAVVKKQNISELKSGDIIVFSSINKLIAHRIIYCNKSKTKIITKGDNKFYNDGYLTATNYYGKINLINNETKSIIPDSKLNSILNFILAKLSYILTPFYRVFFKFIKYSNLG	159	1	OFX61808.1	1	OFX61808.1	MNCNLILYKNPNIVSKMIDNDYLLIPIVKDTMDMNNIFGISEVGTFIWDNIDGETTIKDLIKKVVSEYEIEKKIASNDVYEFITDCFNNNILIQKHFGKQ*	0		ND			ND	ND			0					ND
10	OFX17742.1 hypothetical protein A2033_04300 [Bacteroidetes bacterium GWA2_31_9]	Bacteria	Bacteroidota				OFX17742.1	MTLLVNSNTGIESQKLVEALKESLLNGVSVKIKLGGNSMWPFIKQDTEATIKKTEFKDLKIGDIIVFSSSKKLIAHRIIKLKKGINEIVTKGDNEFFCDKKIGLVFFHGKIIMLKTKTKTINLDSNFYRNFNFFLAKMTYVFTPFYRLIFKISIK	155	1	OFX17740.1	1	OFX17740.1	MIDSNLILHKNPYIVSKVIDNDYLLIPIVEETMDMNNIFGISDVGAFIWDNIDGNTSINEIINKVISEYEIDEDIASLDVNEFIKDCFSQNLLNEVSVE*	0		ND			ND	ND			0					ND
11	EYF04409.1 Hypothetical protein CAP_4548 [Chondromyces apiculatus DSM 436]	Bacteria	Myxococcota	Polyangiales	Polyangiaceae	Chondromyces	EYF04409.1	MQRSMAALLALWDALRERSGPFFVEMRGASMWPAAPEGSLLSVVPCAARALSPGELVMFRRGATVVTHRVVRVEAGGEVICWGDALLERDAPVAAEDVLGRATVVRRGPLLVPARSVVRASLRTGWVAVRRVGAGAARLAGQARAELRR	149	1	EYF04406.1	1	EYF04406.1	MAQMKGVSGEPLVVALPSLGLRLSVALEGVSSEHREALGARWSAGRDEEGRGAAAGTEVAVILRASSGEVGFPASALVAAATRWAGPRRGELRANGVEMALEVEGDALRGEGTFDEARPRGSVEAAVRALMTLALARRGVLVLHAAAVAHGGDAVVLLGASGAGKTTTARRLGREGLRRLSDDLIAIETKASPPVLHRLPFERAGRGPLRGAGEVARCRGGALVQKGAACVQVLEHGDPVRAWVEAVIALGPPPGEVEGLLKAVGRLCAVPLGVLEVPAQGALSPEVRRWIEALGEVAPFPVDASAGGPQARGAGVMREERGQAGRGARQVERAPNVAFRVLDGVVVLVAPSSPAIQTLNEVGSLVWQLADGRSLDAIVDAVVDAFEVEHAVAQADVER…	0		ND			ND	ND			0					ND
11	WP_044244254.1 hypothetical protein [Chondromyces apiculatus]	Bacteria	Myxococcota	Polyangiales	Polyangiaceae	Chondromyces	WP_044244254.1	MAALLALWDALRERSGPFFVEMRGASMWPAAPEGSLLSVVPCAARALSPGELVMFRRGATVVTHRVVRVEAGGEVICWGDALLERDAPVAAEDVLGRATVVRRGPLLVPARSVVRASLRTGWVAVRRVGAGAARLAGQARAELRR	145	1	WP_044244250.1	1	WP_044244250.1	MAQMKGVSGEPLVVALPSLGLRLSVALEGVSSEHREALGARWSAGRDEEGRGAAAGTEVAVILRASSGEVGFPASALVAAATRWAGPRRGELRANGVEMALEVEGDALRGEGTFDEARPRGSVEAAVRALMTLALARRGVLVLHAAAVAHGGDAVVLLGASGAGKTTTARRLGREGLRRLSDDLIAIETKASPPVLHRLPFERAGRGPLRGAGEVARCRGGALVQKGAACVQVLEHGDPVRAWVEAVIALGPPPGEVEGLLKAVGRLCAVPLGVLEVPAQGALSPEVRRWIEALGEVAPFPVDASAGGPQARGAGVMREERGQAGRGARQVERAPNVAFRVLDGVVVLVAPSSPAIQTLNEVGSLVWQLADGRSLDAIVDAVVDAFEVEHAVAQADVER…	0		ND			ND	ND			0					ND
12	RLG01396.1 hypothetical protein DRN58_01860 [Thermococci archaeon]	Archaea	Methanobacteriota				RLG01396.1	MKKIFKYYIITALIVLVILIPSLTVVLPRYYFVSVANGNSMYPTMTDNEICVFLISKDIKEGEIGLYNDGEDLVVHRVVHIQNGKYYFKGDNNDYVDAPVTKDQILGVLVFHIPVWKYNVLFLTIIVGSCSGIVFYTRKILRGDV	145	0		0			0		ND			ND	ND			0					ND
13	PYQ27037.1 hypothetical protein DMF56_22055 [Acidobacteria bacterium]	Bacteria	Acidobacteriota				PYQ27037.1	MTESIDATTMIIDLLGRGHAVRFRAAGDSMHPLVRDNDYLHVEPAAKLRIRRGDVVLTLAPRGLTAHRVMNWDDATLVTRGDNQRLHDTPVVRAHVLGVVTHAERNGSRRRVRRATLTLALRRAYARACLLLGAITSCFFGF	142	1	PYQ27034.1	1	PYQ27034.1	MCTGPSPMNATLLFEGHTVLRPAPNVVCRRVGGESILVPIRQNVGNLDYVYTLSPVAADVWALLDGRPFDDVVDAICEIYEVDRDTAIADVTALLADLLDVALVSRTD*	0		ND			ND	ND			0					ND
14	RMH36650.1 hypothetical protein D6689_22125 [Deltaproteobacteria bacterium]	Bacteria	Myxococcota				RMH36650.1	MDRGIWISLRVRGSSMWPAVRDGSVVEIRPCSVDELRLGDLVAFERTGCLVVHRLVDRRGGRLRFAGDAVIGDDGWFEPGAVLGRVRVLSRPPVRWRVPRPGDARVLVRSAWRVAACRLRAAV	123	0		0			0		ND			ND	ND			0					ND
15	RMG56048.1 signal peptidase I [Acidobacteria bacterium]	Bacteria	Acidobacteriota				RMG56048.1	MEWDIRSLSEQILKSGRVLRFRVRGESMSPLLEDGDVIEVQRVPAGQLYVGDIVLFRSKEGEFLVHRCVKRQSASGQIWVTTKGDAGRGLDRPITVDEVLGRVIRIHRRGRVRFELGSWSRFMNYVLAKWSLYRLGLIRVREGIRMVYHRAARSVWRRH	159	0		0			0		ND			ND	ND			0					ND
16	WP_087862032.1 signal peptidase I [Brevefilum fermentans]	Bacteria	Chloroflexota	Anaerolineales	Anaerolineaceae	Brevefilum	WP_087862032.1	MNIVITEKNLSCDTQAFSAIAIDLLDAGRTLRFTAKGGSMDPLIRDGDTLFLAPADPSRIKFGDVVFFVNGGGKPLIHRVIKTQKRGKDRWLLIRGDRANNVDGYFPPSEIFGRVIAVERVGQQIRADQPVYKFLGRLAAWRSRVFSASPRLFSLIYQLIKRIPSFKHYLS	171	1	WP_066067700.1	1	WP_066067700.1	MNCGFGAAQPGITRNSGACRSKPGGQLELHNSKLSRNEDFVFRRIVEEMVLVPIRQNVAELDSIYTLNELGAFIWEQLESPRSHAELEEAILAEYEIDAETVRTDLASFIEALLRIGAVEEV*	0		ND			ND	ND			0					ND
17	PYV58659.1 hypothetical protein DMG91_03670 [Acidobacteria bacterium]	Bacteria	Acidobacteriota				PYV58659.1	MSQQDDELKSDLAIEALGASGLLRLKVRGNSMLPSLWPGDLVTIEAQMLTNIQGGDIILYWRDARFFIHRVQHKNETLIARGDCMSYADAPVAASELLGRVLSVRRYGLESPVPRFTRLRRLQAFCLRHSEFLQRLALWNHAIRLRRFASTPRVCPEYSIQ	161	0		0			0		ND			ND	ND			0					ND
18	WP_082030566.1 hypothetical protein [Thiolapillus brandeum]	Bacteria	Pseudomonadota	Chromatiales	Sedimenticolaceae	Thiolapillus	WP_082030566.1	MKMLPSKTLENLKAFSGETLHIRIKGHCMAPMLEDGQKVEVKRARSYRAGDILVFADNRGNLIAHRMLGSFRRAGERRYLTRADNSRNPDASISREQILGKLSQHVSPRQRLHCRTGFVVYAATWLWKRGIRRP	134	1	WP_041065677.1	1	WP_041065677.1	MHEEDNLNLHPDILFRAVPPEGVLVDQRVPSVMVVNATGLRMLEMIREKGSRKAVILALADEYEALAETISADVDAFLDDLRSRDMLS*	0		ND			ND	ND			0					ND
19	PIS09522.1 hypothetical protein COT75_01170 [Candidatus Beckwithbacteria bacterium CG10_big_fil_rev_8_21_14_0_10_34_10]	Bacteria	Candidatus Beckwithiibacteriota				PIS09522.1	MNIPSLKKKSLIKNHFIIKAPTKGGSMIPIIKEGSHLLVRLGPKQYQKGDIVVFLKEGQLAAHRIIKTKNSSLILKGDNNSDVDGFFEAKQLLGKVEKIIYPEYTIDLNNRKNQFLKHFFALYSRLNLKFPFLFKIRKLYKIPFLKKLYRFSIKS	155	1	PIS09519.1	1	PIS09519.1	MKLKPKTKIKRSKQVIFKEVEGIVYILDPRNSTIHTLNETASFIWRHLKTPCSIKELTTLMTENFDVEEKKTTVDIEDFISQYLKEELVVLD*	0		ND			ND	ND			0					ND
20	WP_087178058.1 hypothetical protein [Lachnoclostridium sp. An76]	Bacteria	Bacillota	Lachnospirales	Lachnospiraceae	Lachnoclostridium	WP_087178058.1	MRNAHQVDTEEYLKAVSALIAEGREVTVPVRGGSMNPFLADNRDCVLLVPVPERLRRGDIVLFRRSSGQYVLHRIVAVRRSRPGGHEPVYFMRGDAQEMTEGPVARAQVRALAARVMRQGRWLTDRDLRVLFFRHLWCRRYFPRRAALAVYRLVRRITADRTADNLQDSR	170	1	WP_087178062.1	1	WP_087178062.1	MKISENYILREIAGEYIVVPTGSAAMDFKGLITLNDTGVFLWKLLQEDDQTKESLLDALCEEYEAVREEAKADIEEFLQRIRSEGMLIE*	0		ND			ND	ND			0					ND
21	OGL42603.1 signal peptidase I [Candidatus Schekmanbacteria bacterium RBG_13_48_7]	Bacteria	Candidatus Schekmaniibacteriota				OGL42603.1	MLKFLINIFKKIPISIFVVEGSSMYPRLKRGDLIVVVKSKNISVSVDDIIVFRNPEIGLIAHRIIKITETGLFTRGDNNVVQDPEIINKDQILGRVRVRIPWLGFPRIWLKMLTHPVDQ	119	0		0			0		ND			ND	ND			0					ND
22	WP_098439112.1 signal peptidase I [Bacillus sp. es.034]	Bacteria	Bacillota	Bacillales	Bacillaceae	Bacillus	WP_098439112.1	MEKIGTIAKRVISITIFLLIMMIIISIFISLNNSKPLSLFGYKPLTVLSNSMVPTFEAGDVILTREMDAEDLKEGDIISFYNQEGNLITHRITSIVGEAGEKHFYTQGDNNNTEDEDVTTANEIVGKELFHIPNLGFLSQYTKGPMGFLLFIVVPLAGYVCLSVYERIKQKKKEEEFIKS	180	0		0			0		ND			ND	ND			0					ND
23	OGR25484.1 hypothetical protein A2139_13720 [Desulfobacca sp. RBG_16_60_12]	Bacteria	Thermodesulfobacteriota	Desulfobaccales	Desulfobaccaceae	Desulfobacca	OGR25484.1	MGSSMFPLLRTGSVIQVEPLAADDLRPGDVMLYHRAGKAVVAHRLVQKFWENGRLTLVARGDSLPRSTREYINPGQVLGRVVAVDWGQGVKIRLNTAWGKALGTFLASISPLAHRVYPVLSKFRKRFNPSHP	132	1	OGR25481.1	1	OGR25481.1	MESTNYLEKRFSKDPDMVYRRIGDECLLVPISERTADLNYIFVLNPVAGRIWELLDVERSIREIRDIIAGEFEVTSQETEIDLVDFLEQLQKIGGVKEA*	0		ND			ND	ND			0					ND
24	WP_052721119.1 signal peptidase I [Actinoplanes rectilineatus]	Bacteria	Actinomycetota	Micromonosporales	Micromonosporaceae	Actinoplanes	WP_052721119.1	MIRRRAGAHRWASRHRPPHRPHRAPTRQAVHAAAFAFTVSMVLTLFTGAFLPMLWGWKPVVVTSGSMSPLITRGDVVVVDPAATGKAGDVVMYDRPGTGAVTHRIVGYTPDGRYLTKGDANPQRDPQPVTAQAVEGRVRLLVPYLGLPGLRLRTVPAGVVLALGVAALALLALRRRPRLVATAATALVVAVPAGQQAQAAFLGSTGSDVSLATNSQFYRDAVLAADPVSYWRLGETGGTRADQRGLSPLTCSGVTGGTTGALPKDPNTAMTLPAKTAYCRATSAAAHNLTGPFTVVAWERATSWPQTANGRIVAKYGGGTGTLNYMLAWDTAGTAMRAIVDTSTGRYQTVKAMTADSDWHQVAMTWDGTNLRLFVDGTPADGKAAPGTPVTTSTVLTVG…	432	0		0			0		ND			ND	ND			0					ND
25	PUA33249.1 signal peptidase I [Zestosphaera tikiterensis]	Archaea	Thermoproteota	Desulfurococcales	Desulfurococcaceae	Zestosphaera	PUA33249.1	MTLKTRSFLELLMLTLLILLIVLTSSKAIMFAVVEGRSMEPLLQTGDIVLVVNTDVGRLNVGDVVVYEKADGTYIIHRIIGINNANSCFIIKGDNNLMPDGCIASSKIVGKVLSVGTSVVKVPALGYITLLFKALFKTT	139	1	PUA33239.1	1	PUA33239.1	MLGFEEIKSKKPLKQGIELGVEGENYIVSLDEERTYALSLSAYYVWQMCEGTKNVEELIHQISEELKASPEATLSEEELREPVTLILNQLAEVGLIKFVD*	0		ND			ND	ND			0					ND
26	OFY29118.1 hypothetical protein A2X01_17035 [Bacteroidetes bacterium GWF2_35_48]	Bacteria	Bacteroidota				OFY29118.1	MNIEDREQIWELNKKVLQSGATVKIQLSGTSMFPYLKKNDIGYYQFIAPELLQKGDIVAFEQHENFITHRLIKISNSNLFLTRGDACIDFDKTIGASAIIGKLIKIERNGKLISLITPYRNFLHKLFATHRIFIRLYAKFI	141	1	OFY29116.1	1	OFY29116.1	MRELLMRILRKKQNLVARRVGDEYILVPVVNKVAEMDKVYTLNEVGAFIWDQIDGKKTVDEIIQAVTHQYEVKRIIAQDDVINFIKKTENIILN*	0		ND			ND	ND			0					ND
27	PKM80392.1 hypothetical protein CVU89_13590 [Firmicutes bacterium HGW-Firmicutes-14]	Bacteria	Bacillota				PKM80392.1	MNYHQLFCDNVIKEGTSGYLTASGYSMWPVIPDGTLAEISPLGSLFPEKGDLLLINRDGRLTVHRCWKIVCHNGNPMVITKGDTNLGFDPPTPLNQVLGRVVKLRFRVLGDMNPNRGFLKLYSEVICMAEPLARYWARICQFLLRRKKRSCIDDGFR	157	1	PKM80391.1	1	PKM80391.1	MMDSGNIRKNPKLITRITDGEAVIMHPDLGKVLSLNEVGSFIWEMADGSRNREQLLDAVCSEFDVDREQAAGDLDEFLDTLREKDLLED	0		ND			ND	ND			0					ND
28	WP_127529584.1 hypothetical protein [Paenibacillus kobensis]	Bacteria	Bacillota	Bacillales	Paenibacillaceae	Paenibacillus	WP_127529584.1	MHSTSRRDFLIRALQNGRPIPISIEGNCMHPLLVHGQNAVVYPVDEIKAGDVVLVRDQVNQLLAHRILSLEHDSVITAGDRNDLSDPPILRSDILGRLDMPEDREKEWTAPLATSELKVLVHPNAIDSERCKDLSHAFAVDIAIEENLVSQLLDLRENGWATVAIHSGARQHLSDLPDIGGKVAVFVGYDVGKETDPSSGTIGASDVGFVARTAIKYWNSLHADVSVAAIIGFHMRRTESCHG	243	0		0			0		ND			ND	ND			0					ND
29	OGD46515.1 hypothetical protein A3K79_01535 [Candidatus Bathyarchaeota archaeon RBG_13_46_16b]	Archaea	Candidatus Bathyarchaeota				OGD46515.1	MAKCSLTVAGGDDMYPALRIGEELEIETVPPEGISAGDVIVFNRCVLIAHRVVGTLKRGSEYFFLTHGDKCPCFDSPVPSQIVIGRVVGKSIPMLFATRTKILFSAILLWHSATCRLLGNPIIRRLNRMALRKSSFLILS	140	1	OGD46518.1	1	OGD46518.1	MSKEITSKTKLKKSPDVAEKTGKETLIFDVVAGRLYELNETGRILWSLCDGKHAIDDMMKTIREQYDVSDSKVKEEVFSFLKKMLEAGLIR*	0		ND			ND	ND			0					ND
30	PIP88705.1 signal peptidase I [Bdellovibrionales bacterium CG22_combo_CG10-13_8_21_14_all_38_13]	Bacteria	Bdellovibrionota	Bdellovibrionales			PIP88705.1	MFRAKGNLLPSPTSNGCNLNIETIKQQIDKIGFIEITIKGNSMDPVLREGQTYFVKKISVKHLKKFQIILFAENDQLISHYIRQIKINQNIEIKTKGINNNYFDKPISPDKIIGVYKEKIPFSLRIKHLAKDFLSGV	137	2	PIP88707.1; PIP88714.1	2	PIP88707.1; PIP88714.1	MKFIDEFIVNKVNETESYGVDLRNSDSVVIKFSGVSSFFAQGIISQESEDQIISNVLENYEIQDKAVVAKDFSNFISYLNKLNVLA*; MKISPNIAFNKINDDEIKVLKLDDDNNVYTLEKSVAHVFDMINKEEKIDAITKSISEQTKKDEKEVVTFVNETIEEFKKLGFFE	0		ND			ND	ND			0					ND
31	RLG09900.1 signal peptidase I [Thaumarchaeota archaeon]	Archaea	Nitrososphaerota				RLG09900.1	MSKGDVFFLLVTILLLGFLVTALTYRLSGRVVPFLVVKSGSMYPVLKIGDVIMISDIKPEDLRIGDVIVYYKPGTGQLIVHRIVKKTQSGVYTKGDANPGIDVWCPIPYENIVGRWNGFKIPYWLGIGYLSLFLNGEIYPPFGPILLLCLIILNVVLIVKDLVKGWKSGEESSQ	174	0		0			0		ND			ND	ND			0					ND
32	KKU49205.1 Peptidase S26B signal peptidase [Parcubacteria group bacterium GW2011_GWA2_46_9]	Bacteria					KKU49205.1	MKKVLKILLNIGIYLGIVVAVLFGLPRFLSWYLATPYPMAAITSGSMWPALKQGDLVLIQGVKKEDLKVGDVVVWQNPQGFTIHRVAELNPDTVVTKGDANFTKDTPVKYEEVVGRTVKLFGRDVRLPYFGMISVYARDKKLK	143	0		0			0		ND			ND	ND			0					ND
33	PYX28973.1 hypothetical protein DMG77_13905 [Acidobacteria bacterium]	Bacteria	Acidobacteriota				PYX28973.1	MTSRGSHSEMFEALSRELLKAGVCVRFEARGGSMSPSIRDGEIVHVTPVIVSKLRKGDIVLTKSDSGFRVHRLVIVECEKNVFVTRGDCGLQDDPAVRGEEILGVAEAKEVQVGRRMVRAKLRGIGGRALQCAARAEVLLSKLGKVARITWSQRRVLSKAAREAPPSLVCALGLLLLLLIGSTQAAAQVLVDASTSGTALITGTGTGTVNFNHTTTATANRLLLVGVSINLTNSNGAAVTGVTYNGTALNFVGAHNDAGNTRRVEVWSRLNPVAGANLPIVVTVNVPTAGATVGVVAGGTTFTGVDQTVPLGNFVSADGAAAFNSQLDVPGVVNGMVFDTLAIAGNRTITVPAPQVQQWNAVSGGSGTRDPRASGSTRAGAPSVPISETFNGASNWSLG…	3031	1	PYX28970.1	1	PYX28970.1	MSSECYENRTKENSGQVDMEQQVFFRSQSVVSRIVAGETLIVPIRGRVGDLASIYSFNGTGSLIWQMLESPRTVVELVEAVAQEFDVERARAEKDVKRFVREMIAVCLVEVSTFVAAGTEGPVGREGLAAAGAR*	0		ND			ND	ND			0					ND
34	WP_118680916.1 signal peptidase I [Eisenbergiella sp. OF01-20]	Bacteria	Bacillota	Lachnospirales	Lachnospiraceae	Eisenbergiella	WP_118680916.1	MKQKRKKRSLSGITGGLLCLLFLPVIILNLLLIADSYINPEALPGVLGIKPAIVLSGSMEPVIRAGDLIFIHSTETEKLREGDVICYLDSGAAVTHRIIAISTGEDGLLRYQTKGDANDAQDRISVTADQIQGTWKGGRIAGLGNVLLFMQTTTGMLLFLVLPLVLFFLWDMGIRYRSDKKEALSRAELEAELTALKTEKENAESAEP	208	0		0			0		ND			ND	ND			0					ND
35	OGV92686.1 signal peptidase I [Microgenomates group bacterium RIFCSPLOWO2_01_FULL_47_10]	Bacteria					OGV92686.1	MTKPVIAIKLQHISKSFNLDKTTTLKEVFAPSSKSQHTFQALKDISFSITKNQTIGLFGANGSGKSTLLRLIAGMLKPDSGQIITHGKIAPVIELGSGLHPELTGSENIFLYGATLGMSQSQIRQAYAQIVTYSEIPAFMDQPIKKYSSGMKARLAFAIAIHSQPDILLLDEVLSVGDIDFRLKAIKSIQQLKTKSTVIVVSHDLNLLLNLCDKIVTLDQGKIVNQFDQESQQIKTFLSQILRDSQSIKIQATSNSMSPAIHSGDVLEIKKKSFLQIKIGQIIAFTFPNLCHFITHRIMAKTTLSGKVGYITKGDSNLSMDSWIITHANYLGTVTHINKTKYR	343	1	OGV92687.1	1	OGV92687.1	MFRRKKIVLSKQVDGVWLILEKDKIHVRRLNEVAGFLWGNLSNWRSEENLVNDLVSAFEVAKEVAKQDVMKWLEEYVRLDFLEKK*	0		ND			ND	ND			0			OGV92695.1		ND
36	WP_093411367.1 signal peptidase I [Verrucosispora sediminis]	Bacteria	Actinomycetota	Micromonosporales	Micromonosporaceae	Micromonospora	WP_093411367.1	MTTAVAGFADLIAHALSAGRTARIPVTGSSMWPAIDPGSVVTVEPAAWPQIRPGDVVAYRHQDTVIVHRVIERRDDHLITAGDNKPLFDPPVAAAALLGRVTGVPDPVAPPASTSAAAAEATVWVVGDRAAVAPPGVRLRQIAPAELAAALRSVTGTIAGVSAAAVRPLTALRSAPPGPLTVVIGIRFGRSGASRTGYDPGGLPVLPPDAVHLHVRAGDPLSDVGPDDAVRAVAETLGHSEGTVR	245	1	WP_093411365.1	1	WP_093411365.1	MAHRHRSRRRGPPPGPAGADQPDGGFVVLSVNPEVVWVDNDDEVRIYHPGTGEFQTLNATAARIWRKLANGAQIDDVVRDLATEFDAQDEHDRRQIDRDVREFVSELGQLGMLGPSRTAEAGR*	0		ND			ND	ND			0					ND
