# Supplementary material for: Rules of Coexistence: RiPP Recognition Elements Evolved to Prevent Pathway Interference through Leader Peptide Discrimination
Source: Research Square preprint supplement (doi:10.21203/rs.3.rs-7990798/v1), 2025-11-13
Supplement: Supplementary file 3 [file c79f024be51711cdb9167d95.docx]

SUPPORTING INFORMATION FOR:

**Rules of Coexistence: RiPP Recognition Elements Evolved to Prevent Pathway Interference through Leader Peptide Discrimination**

Aleksandr Popov1,2, Dmitriy Bikmetov3, Anastasia Grigoreva3, Marina Serebryakova4, Konstantin Severinov3, Guy Lippens5, Akira Wada1,2, Shunsuke Tagami1*, Svetlana Dubiley5*

1 RIKEN Center for Integrative Medical Sciences, Yokohama, Kanagawa, 230-0045, Japan

2Graduate School of Medical Life Science, Yokohama City University, Yokohama, Kanagawa 230-0045, Japan

3Institute of Gene Biology, Russian Academy of Science, Moscow 119334, Russia

4A.N. Belozersky Institute of Physicochemical Biology MSU, 119992 Moscow, Russia

5Toulouse Biotechnology Institute, CNRS/INRAE/INSA/UPS, 31077 Toulouse, France

*Authors to whom correspondence should be addressed: [shunsuke.tagami@riken.jp](mailto:shunsuke.tagami@riken.jp), [svetlana.dubiley@gmail.com](mailto:svetlana.dubiley@gmail.com)

**Table S1 is provided as a separate Excel file**

**Table S2. Data collection and refinement statistics**

| Name | LppB•LppAL | PbaB1•PbaAL |
| --- | --- | --- |
| PDB ID | pdb_00009x8z | pdb_00009x90 |
| **Data collection** | | |
| Beamline | PF BL5-A | SPring8 BL32XU |
| Wavelength (Å) | 1.00 | 1.00 |
| Space group | P 212121 | P 43 |
| Unit cell parameters:  a; b; c (Å)  α; β; γ (o) | 52.90; 55.60; 83.87  90; 90; 90 | 49.79; 49.79; 135.01  90; 90; 90 |
| Resolution (Å) | 50.00 – 2.10 (2.15 – 2.10) | 50.00 – 2.00 (2.05 – 2.00) |
| CC1/2 | 99.80 (74.40) | 99.70 (79.90) |
| I/σ | 11.69 (1.79) | 11.12 (2.56) |
| Completeness (%) | 98.20 (97.10) | 99.10 (99.80) |
| Unique reflections | 27534* (2023*) | 21968 (22169) |
| Rmeas (%) | 13.50 (104.60) | 21.10 (118.50) |
| **Refinement statistics** | | |
| Resolution (Å) | 32.85 – 2.10 | 46.71 – 2.00 |
| Reflections | 27532* | 21957 |
| Rwork | 0.20 | 0.23 |
| Rfree | 0.25 | 0.26 |
| Number of atoms (total) | 1814 | 1959 |
| Number of protein atoms | 1720 | 1685 |
| Number of water atoms | 94 | 274 |
| **RMSDs** | | |
| Bond length (Å) | 0.007 | 0.007 |
| Bond angles (o) | 0.943 | 0.852 |
| **Ramachandran plot** | | |
| Outliers (%) | 0.00 | 0.00 |
| Allowed (%) | 1.95 | 0.96 |
| Favored (%) | 98.05 | 99.04 |
| Values in parentheses are for the high-resolution shell  *Anomalous data | | |

**Table S3. PCR primers used in the study**

| No. | Primer ID | Sequence | Purpose |
| --- | --- | --- | --- |
| 1 | pHT_LppA_FB | TTATATGGATCCATGGAAGAAAATACGAAGAGGGAACAAA | *lpp-*full and *lpp∆N* BGC expression |
| 2 | pHT_LppN_RAat | TTATATGACGTCTTACATCTTTTTGATCTTATGCGATAACCTC |
| 3 | pHT_LppD_RSma | TTATATTTATATAACGCTTGTATCAAAGTAATGATCAA |
| 4 | LppB_dK_F | CTCAGGGGATGAAGCATGACCCAGTACCTTCGGATG | *lpp∆B*; *lpp∆S*; *lpp∆K* BGC expression |
| 5 | Lpp_dK_pl_R | AAGGTACTGGGTCATGCTTCATCCCCTGAGGTCGA |
| 6 | Lpp_dK_pl2_R | CTAGGCTTGCGTGCTTTCTCT |
| 7 | pGrac_inf_R | TTGTTATCCGCTCACAATTCC |
| 8 | Lpp_dK_pl2_F | AAGCACGCAAGCCTAGACTT |
| 9 | Lpp_dS_inf_F | ATCAATGCCTCGTAACCTTCTTTCCG |
| 10 | LppD_dS_F | GAATTTGTACAGATAACTTTCTATGGAGTGACCTATGACTGG |
| 11 | Lpp_dS_pl2_R | GAAGTGAGACATCAGCTCACCAGA |
| 12 | lpp_dS_pl2_F | CTGATGTCTCACTTCTCCAATGATATTCAT |
| 13 | lpp_dS_inf_R | TTACGAGGCATTGATAGTTTAGCGGC |
| 14 | pAIR_LppB_FB | TTATATGGATCCGATGACCCAGTACCTTCGGATG | RRE•leader peptide complexes purification |
| 15 | pAIR_LppB_RX | TTATATCTCGAGTTATGAAACTGCATGTTGAACCAAGCC |
| 16 | LppAleader_pAIR_R | AAGCTTGTCGACCTGTGTCTCAAATCGAACGGGTTGT |
| 17 | pAIR_inf_F | CAGGTCGACAAGCTTGCG |
| 18 | LppA_pAIR_F | ATAAGGAGATATACCATGGAAGAAAATACGAAGAGGGAACAAA |
| 19 | pAIRinf_R | GGTATATCTCCTTATTAAAGTTAAACAAAAT |
| 20 | PbaB1_pAIR_F | CACAGCCAGGATCCGATGATCAAAAACCAAGCGCTTTCGC |
| 21 | pAIR_RRE_inf_R | CGGATCCTGGCTGTGGT |
| 22 | PbaB1_pAIR_R | ACCAGACTCGAGTTATCAAATTGCCCATTGATTTTCCACGC |
| 23 | pAIR_inf2_F | TAACTCGAGTCTGGTAAAGAAAC |
| 24 | PbaAleader_pAIR_R | AAGCTTGTCGACCTGCATTGTTTGATTAACATCCAATACTTCAAGCTCAGGTTTCAACCATT |
| 25 | PbaA_pAIR_F | ATAAGGAGATATACCATGAAAAAAGAATGGTTGAAACCTGAGCTTGAAGTATTGGATGT |
| 26 | LppA_FKpn | TTATATGGTACCGAAAACCTGTACTTCCAATCCATGGAAGAAAATACGAAGAGGGAACAAA | Pull-down systems vectors construction |
| 27 | LppA_RSal | TTATATGTCGACCTTATTCTTACCGTTACCGTTGCC |
| 28 | Trx_PbaA_comp_F | GAAGGAGATATACATATGAGCGATAAAATCATCCATCTGACCGATG |
| 29 | Trx_PbaA_R | GCTCCATGTTAATTTGTCTTTAGGAGTACCTTCCG |
| 30 | CBD_F | AAATTAACATGGAGCACTGGCCTCACCGGTCT |
| 31 | CBD_comp_R | ACCAGACTCGAGTTATCATTGAAGCTGCCACAAGGC |
| 32 | comp_inf_R | ATGTATATCTCCTTCTTATACTTAACTAATATACTAAGATGGGGA |
| 33 | LppB_Strep_F | ACCATGGGCAGCAGCTGGAGCCACCCGCAGTTCGAAAAAATGACCCAGTACCTTCGGATG |
| 34 | pET_inf1_R | GCTGCTGCCCATGGTATATCTCCTTCTTAAAGTTAAA |
| 35 | LppB_Strep_R | TCCATGTGCTGGCGTTTATGAAACTGCATGTTGAACCAAGCC |
| 36 | LppS_pET_R | TCCATGTGCTGGCGTCTAGGCTTGCGTGCTTTCTCTTCGA |
| 37 | pET_inf2_F | ACGCCAGCACATGGACTC |
| 38 | PbaB1_Strep _F | ACCATGGGCAGCAGCTGGAGCCACCCGCAGTTCGAAAAAATGATCAAAAACCAAGCGCTTTCG |
| 39 | PbaB1_Strep_R | TCCATGTGCTGGCGTTCAAATTGCCCATTGATTTTCCACGC |
| 40 | PbaB2_pET_R | TCCATGTGCTGGCGTCTATTCACTTATATATTTGGCAAACTTGCCGAC |
| 41 | FusB1_Strep_F | ACCATGGGCAGCAGCTGGAGCCACCCGCAGTTCGAAAAAATGGAAACCACCGGTGCAG |
| 42 | FusB1_Strep_R | TCCATGTGCTGGCGTTTACGGCAGTGCCATACCATTTTC |
| 43 | MBP_LppA_pRSF_F | ATAAGGAGATATACCATGGCAAAAATCGAAGAAG |
| 44 | TrxA_LppA_pRSF_R | ACCAGACTCGAGGGTTTACGCCAGGTTAGCGTCGAG |
| 45 | TrxA_PbaA_pRSF_F | ATAAGGAGATATACCATGAGCGATAAAATCATCCATCTGACCGATG |
| 46 | CDB_PbaA_pRSF_R | ACCAGACTCGAGGGTTCATTGAAGCTGCCACAAGGC |
| 47 | pRSF_inf_F | ACCCTCGAGTCTGGTAAAGAAAC |
| 48 | pRSF_inf_R | GGTATATCTCCTTATTAAAGTTAAACAAAAT |
| 49 | MBP_FusA_F | CTGTACTTCCAATCCATGGAAAAGAAGAAATATACCGCACCG |
| 50 | MBP_inf_R | GGATTGGAAGTACAGGTTTTCGGT |
| 51 | MBP_FusA_R | ACCAGACTCGAGGGTATTAAATAAAACGCGGAAAAACAAAAATCAGTTCTA |
| 52 | LppK_FB | TTATATGGATCCGATGGAACTCTTTCATACACAAATTGGTGAG |
| 53 | LppK_RX | TTATATCTCGAGTTATTACGAAATCAACTCCCAAAATGTATCGTTT |
| 54 | LppB_pAIR2_F | CTCACTGGCAGCAGCTGGAGCCACCCGCAGTTCGAAAAAATGACCCAGTACCTTCGGATG |
| 55 | pAIR_inf2_R | GCTGCTGCCAGTGAGATCTG |
| 56 | LppB_pAIR2_R | ACCAGACTCGAGTTATTATGAAACTGCATGTTGAACCAAGCC |
| 57 | LppA_Y-16A_F | AGGGAACAAAAATTGGCGGCGCGCCCCATGGTT | Precursor peptide mutations |
| 58 | LppA_Y-16A_R | AACCATGGGGCGCGCCGCCAATTTTTGTTCCCT |
| 59 | LppA_P-13A_F | AAATTGTATGCGCGCGCGATGGTTTTAAGTCAA |
| 60 | LppA_P-13A_R | TTGACTTAAAACCATCGCGCGCGCATACAATTT |
| 61 | LppA_V-11A_F | GCGCGCCCCATGGCGTTAAGTCAACAACCCGTT |
| 62 | LppA_V-11A_R | AACGGGTTGTTGACTTAACGCCATGGGGCGCGC |
| 63 | LppA_L-10A_F | GCGCGCCCCATGGTTGCGAGTCAACAACCCGT |
| 64 | LppA_L-10A_R | ACGGGTTGTTGACTGCGAACCATGGGGCGCGC |
| 65 | LppA_F-3A_F | CAACAACCCGTTCGAGCGGAGACAGCTCAAAGC |
| 66 | LppA_F-3A_R | GCTTTGAGCTGTCTCCGCTCGAACGGGTTGTTG |
| 67 | LppA_E-2A_F | CAACCCGTTCGATTTGCGACAGCTCAAAGCTGG |
| 68 | LppA_E-2A_R | CCAGCTTTGAGCTGTCGCAAATCGAACGGGTTG |
| 69 | LppA_T-1A_F | CCCGTTCGATTTGAGGCGGCTCAAAGCTGGAAT |
| 70 | LppA_T-1A_R | ATTCCAGCTTTGAGCCGCCTCAAATCGAACGGG |
| 71 | LppA_A1S_F | GTTCGATTTGAGACAAGCCAAAGCTGGAATAAG |
| 72 | LppA_A1S_R | CTTATTCCAGCTTTGGCTTGTCTCAAATCGAAC |
| 73 | LppA_Q2A_F | CGATTTGAGACAGCTGCGAGCTGGAATAAGGGG |
| 74 | LppA_Q2A_R | CCCCTTATTCCAGCTCGCAGCTGTCTCAAATCG |
| 75 | LppA_S3A_F | TTTGAGACAGCTCAAGCGTGGAATAAGGGGAAA |
| 76 | LppA_S3A_R | TTTCCCCTTATTCCACGCTTGAGCTGTCTCAAA |
| 77 | LppA_S3T_F | TTTGAGACAGCTCAAACATGGAATAAGGGGAAA |
| 78 | LppA_S3T_R | TTTCCCCTTATTCCATGTTTGAGCTGTCTCAAA |
| 79 | LppA_S3Y_F | TTTGAGACAGCTCAATATTGGAATAAGGGGAAA |
| 80 | LppA_S3Y_R | TTTCCCCTTATTCCAATATTGAGCTGTCTCAAA |
| 81 | LppA_W4A_F | GAGACAGCTCAAAGCGCGAATAAGGGGAAAGGT |
| 82 | LppA_W4A_R | ACCTTTCCCCTTATTCGCGCTTTGAGCTGTCTC |
| 83 | LppA_N5A_F | ACAGCTCAAAGCTGGGCGAAGGGGAAAGGTAAC |
| 84 | LppA_N5A_R | GTTACCTTTCCCCTTCGCCCAGCTTTGAGCTGT |
| 85 | LppA_Y-16W_F | AGGGAACAAAAATTGTGGGCGCGCCCCATGGTT |
| 86 | LppA_Y-16W_R | AACCATGGGGCGCGCCCACAATTTTTGTTCCCT |
| 87 | PbaA_W-15Y_F | ATGAAAAAAGAATATTTGAAACCTGAG |
| 88 | PbaA_W-15Y_R | CTCAGGTTTCAAATATTCTTTTTTCAT |
| 89 | LppB_N33A_F | ACCTTAACGAAGTTAGCGGGAGTGGGTGGATTT | RRE mutations |
| 90 | LppB_N33A_R | AAATCCACCCACTCCCGCTAACTTCGTTAAGGT |
| 91 | LppB_D70A_F | GAAACGGTAGAAGAAGCGATTGAAGCGTTCTTG |
| 92 | LppB_D70A_R | CAAGAACGCTTCAATCGCTTCTTCTACCGTTTC |
| 93 | LppB_E11K_F | CGGATGAATGATTATAAATCTATTCAATTAGAT |
| 94 | LppB_E11K_R | ATCTAATTGAATAGATTTATAATCATTCATCCG |
| 95 | LppB_L22A_F | ATGGAATGGATTATTGCGAACACAGATGAGTAT |
| 96 | LppB_L22A_R | ATACTCATCTGTGTTCGCAATAATCCATTCCAT |
| 97 | LppB_L29K_F | ACAGATGAGTATACCAAAACGAAGTTAAACGGA |
| 98 | LppB_L29K_R | TCCGTTTAACTTCGTTTTGGTATACTCATCTGT |
| 99 | LppS_S29A_F | CCAGCTCGTGGAACGGCGATGTATCCTTTTATT | Peptidase mutations |
| 100 | LppS_S29A_R | AATAAAAGGATACATCGCCGTTCCACGAGCTGG |
| 101 | LppS_H68A_F | GGTAACTTAGTCGCCGCGCGTTTCTGCCGATT |
| 102 | LppS_H68A_R | AATCGGCAGAAACGCGCGGCGACTAAGTTACC |
| 103 | LppS_D93A_F | ACCAACTTAGCGCATGCGGAGGCTATTGCACAG |
| 104 | LppS_D93A_R | CTGTGCAATAGCCTCCGCATGCGCTAAGTTGGT |
| 105 | LppS_E6K_F | ATGCAGTTTCATAAGAAATTTGTACAGATAATG |
| 106 | LppS_E6K_R | CATTATCTGTACAAATTTCTTATGAAACTGCAT |
| 107 | LppS_I10K_F | AAGGAATTTGTACAGAAAATGACTCATGCAATT |
| 108 | LppS_I10K_R | AATTGCATGAGTCATTTTCTGTACAAATTCCTT |
| 109 | LppS_R18_F | CATGCAATTAATAAAGCGGGATGGATCGAGCTT |
| 110 | LppS_R18_R | AAGCTCGATCCATCCCGCTTTATTAATTGCATG |
| 111 | PURE_F | GCGAATTAATACGACTCACTATAGGGCTTAAGTATAAGGAGGAAAAAATATGAAAATAAAAACAGGAGCACGCAATAAC | Cell-free protein synthesis |
| 112 | PURE_R | GGCCTGTACAGAATTCGGTCCTTATTA |
| 113 | LppB_PURE_F | ATGAAAATAAAAACAGGAGCACGCAATAACATGACCCAGTACCTTCGGATGA |
| 114 | LppB_PURE_R | GGCCTGTACAGAATTCGGTCCTTATTATTATGAAACTGCATGTTGAACCAAGCC |
| 115 | LppS_PURE_F | ATGAAAATAAAAACAGGAGCACGCAATAACATGCAGTTTCATAAGGAATTTGTACA |
| 116 | LppS_PURE_R | GGCCTGTACAGAATTCGGTCCTTATTACTAGGCTTGCGTGCTTTCTCTT |
| 117 | qPCR_PbaB1_F | CGCTGCAGGATATTGTTGTCCAA | RT-qPCR |
| 118 | qPCR_PbaB1_R | ATTGCATCCCAAATTATCCCGCC |
| 119 | qPCR_LppB_F | CTGGTCATTGCTTGGCGCA |
| 120 | qPCR_LppB_R | GAACCAAGCCGCGTCCAAT |
| 121 | qPCR_gyrA_F | CGGCGAGAATCGTTGGTGAAG |
| 122 | qPCR_gyrA_R | CCAAAGTTACCATGACCATCGACC |
| 123 | qPCR_Polysac_F | CATCCGGATTCCTCCACCTCAG |
| 124 | qPCR_Poysac_R | GCTGTCGTCGTTTTCCCTTCAC |
| 125 | dRok_FB | TTATAGGATCCGGATTTCCGTTCTGAAAAAAAACCTGACTCTCT | *rok* knockout |
| 126 | dRok_RX | TTATACTCGAGAAGACCGCTTTCTTTTTCAATCTCTTTTTGAAGC |

**Table S4. Synthetic DNA fragments used in the study**

| No. | DNA fragment ID | Manufacturer | Sequence |
| --- | --- | --- | --- |
| 1 | lppALC-sfGFP | Thermo Fisher | GCGAATTAATACGACTCACTATAGGGCTTAAGTATAAGGAGGAAAAAATATGAAAATAAAAACAGGAGCACGCAATAACATGGAAGAAAATACGAAGAGGGAACAAAAATTGTATGCGCGCCCCATGGTTTTAAGTCAACAACCCGTTCGATTTGAGACAGCTCAAAGCTGGAATAAGGGGAAAGGTAACCTAAATCACCCGGGTACAGGGAATGGCGGCATTAATTATCCGAACCCTCCGTACACCGGACCGCATAATGGTAACGGAGGCGGCAACGGTAACGGTAAGAATAAGCATCACCATCATCACCACTCCGCGGCTCTTGAAGTCCTCTTTCAGGGACCCATGAGCAAAGGAGAAGAACTTTTCACTGGAGTTGTCCCAATTCTTGTTGAATTAGATGGTGATGTTAATGGGCACAAATTTTCTGTCCGTGGAGAGGGTGAAGGTGATGCTACAAACGGAAAACTCACCCTTAAATTTATTTGCACTACTGGAAAACTACCTGTTCCATGGCCAACACTTGTCACTACTCTGACCTATGGTGTTCAATGCTTTTCCCGTTATCCGGATCACATGAAACGGCATGACTTTTTCAAGAGTGCCATGCCCGAAGGTTATGTACAGGAACGCACTATATCTTTCAAAGATGACGGGACCTACAAGACGCGTGCTGAAGTCAAGTTTGAAGGTGATACCCTTGTTAATCGTATCGAGTTAAAAGGTATTGATTTTAAAGAAGATGGAAACATTCTCGGACACAAACTCGAGTACAACTTTAACTCACACAATGTATACATCACGGCAGACAAACAAAAGAATGGAATCAAAGCTAACTTCAAAATTCGCCACAACGTTGAAGATGGTTCCGTTCAACTAGCAGACCATTATCAACAAAATACTCCAATTGGCGATGGCCCTGTCCTTTTACCAGACAACCATTACCTGTCGACACAATCTGTCCTTTCGAAAGATCCCAACGAAAAGCGTGACCACATGGTCCTTCTTGAGTTTGTAACTGCTGCTGGGATTACACATGGCATGGATGAGCTCTACAAAGGTAGCTAATAAGGACCGAATTCTGTACAGGCC |
| 2 | trxA-pbaALC | Thermo Fisher | AGCGATAAAATCATCCATCTGACCGATGATAGCTTTGATACCGATGTTCTGAAAGCAGATGGTGCAATTCTGGTTGATTTTTGGGCAGAATGGTGTGGTCCGTGTAAAATGATTGCACCGATTCTGGATGAAATCGCGGATGAATATCAGGGTAAACTGACCGTTGCAAAACTGAACATTGATCAGAATCCGGGTACAGCACCGAAATATGGTATTCGTGGTATTCCGACACTGCTGCTGTTTAAAAACGGTGAAGTTGCAGCAACCAAAGTTGGTGCACTGAGCAAAGGTCAGCTGAAAGAATTTCTGGATGCCAATCTGGCAGGCACCGAAAATCTGTATTTTCAGAGCATGAAAAAAGAATGGTTGAAACCTGAGCTTGAAGTATTGGATGTTAATCAAACAATGCTTGATCCGAAAAATGGTAACCACCTTGATCATGCTTATACGGAAGGTACTCCTAAAGACAAATTAACATGGAGCTAA |


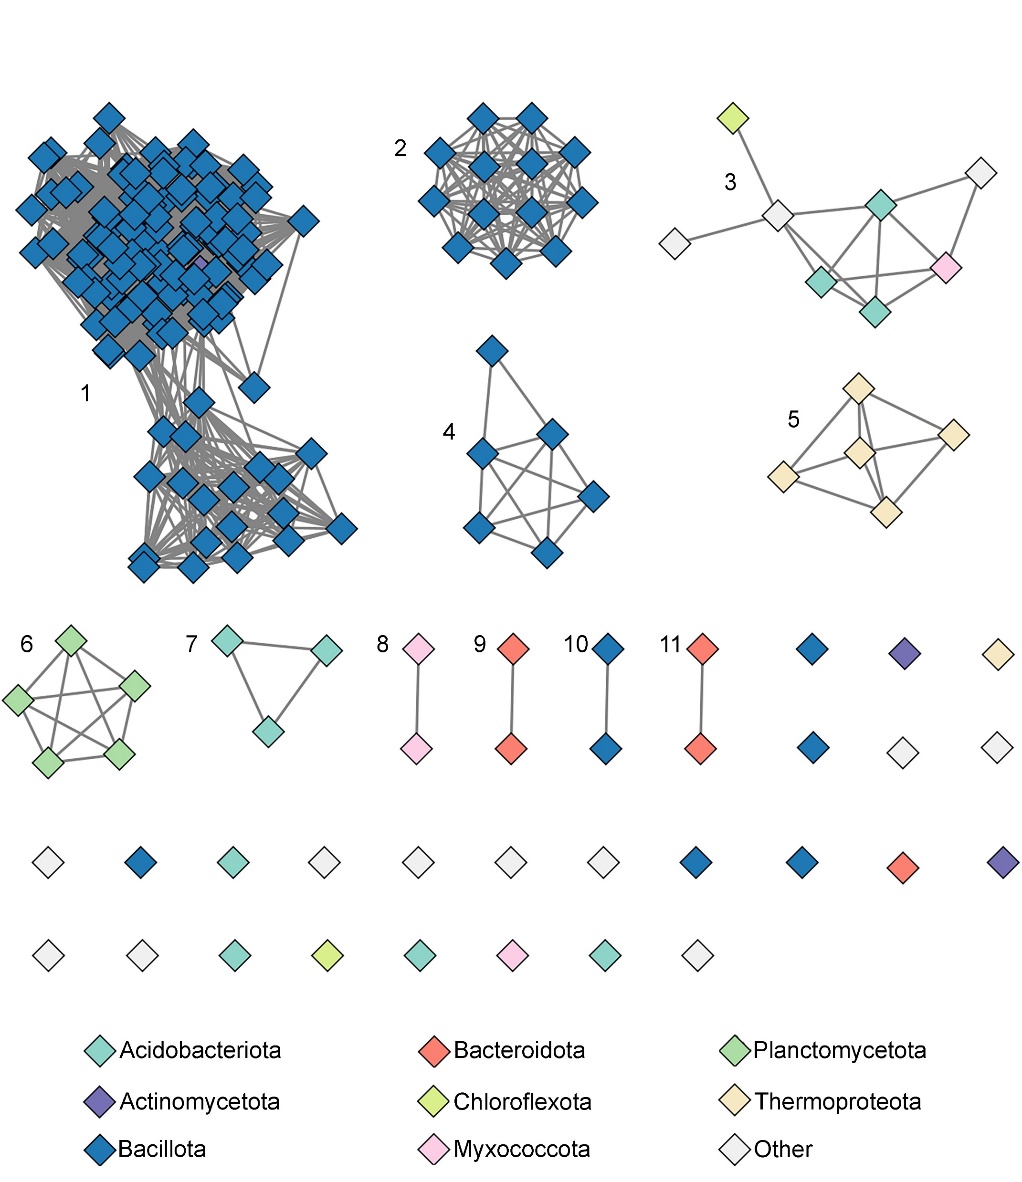


**Figure S1. Sequence similarity network of proteins, homologous to the signal peptidase I from the *lpp* biosynthetic gene cluster of *Paenibacillus alginolyticus* DSM5050 (WP_029196374.1).** Edges corresponding to an E-value higher than 10e-23 are removed. Nodes are colored according to the phylum.


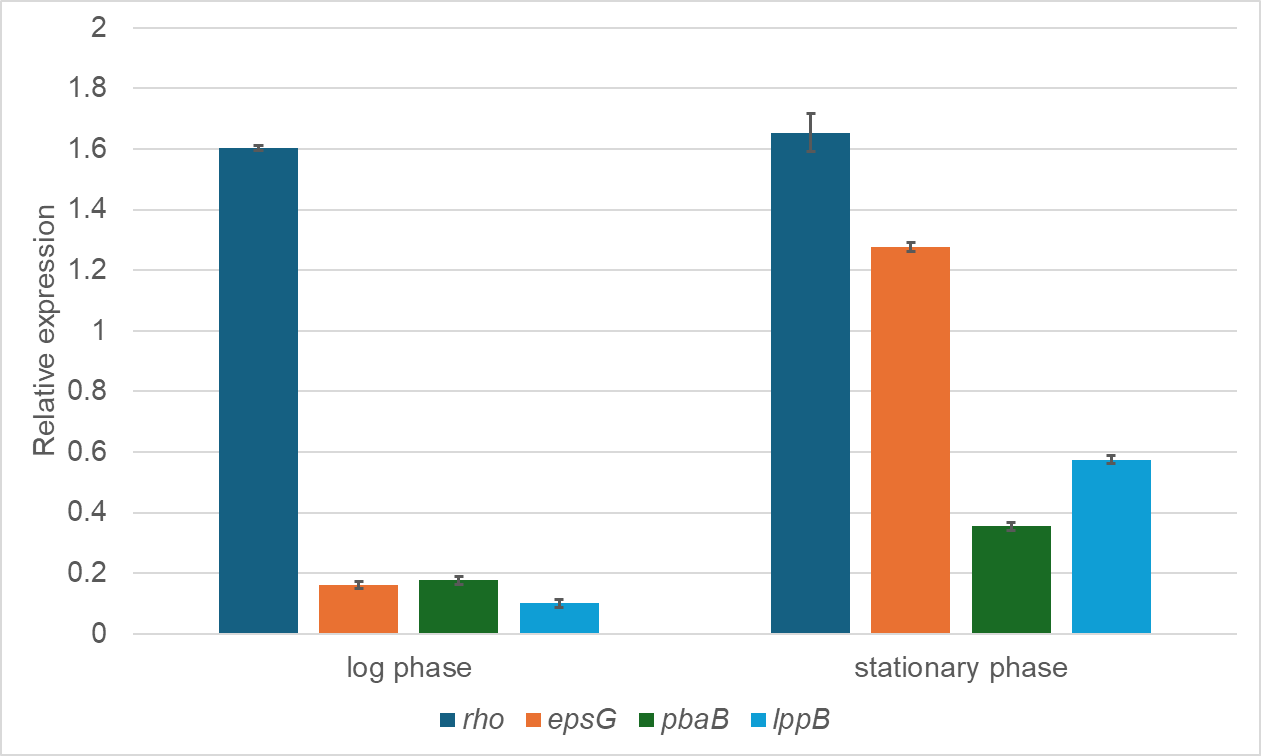


**Figure S2. RT-qPCR analysis of *lpp* and *pba* BGCs expression levels in *Paenibacillus alginolyticus* DSM5050 cells harvested at early logarithmic and stationary growth phases in 1/2 LB medium.** Data were normalized to the expression level of the constitutively expressed *gyrA*. Expression of *rho* was used as a positive technical control. *espG* (PAL01S_RS16325) is the exopolysaccharide chain length-determining protein tyrosine kinase gene colocalized with *lpp* and *pba* (Figure S3).


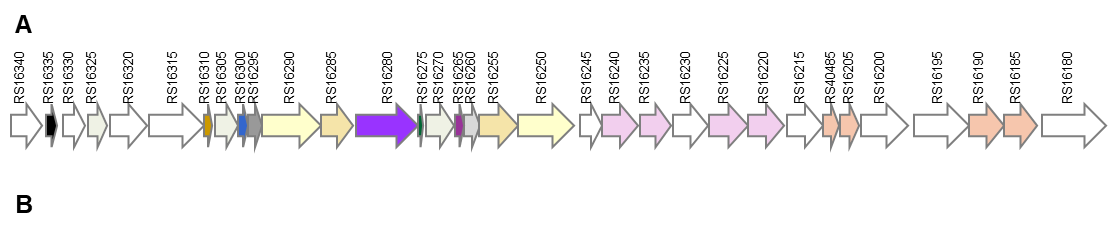


| **Locus tag** | **Protein family** | **Annotation** | **Name** |
| --- | --- | --- | --- |
| PAL01S_RS16340 | TIGR00277 | HDIG: HDIG domain |  |
| PAL01S_RS16335 | TIGR03020 | EpsA: transcriptional regulator EpsA |  |
| PAL01S_RS16330 | TIGR01006 | polys_exp_MPA1: polysaccharide export protein, MPA1 family |  |
| PAL01S_RS16325 | TIGR03029 | EpsG: chain length determinant protein tyrosine kinase EpsG |  |
| PAL01S_RS16320 | TIGR01730 | RND_mfp: efflux transporter, RND family, MFP subunit |  |
| PAL01S_RS16310 | No match |  |  |
| PAL01S_RS16315 | No match |  | *lppALC* |
| PAL01S_RS16305 | TIGR04352 | HprK_rel_A: HprK-related kinase A | *lppK* |
| PAL01S_RS16300 | RREFam002 | Discrete RRE protein in a lasso peptide cluster | *lppB* |
| PAL01S_RS16295 | TIGR02228 | sigpep_I_arch: signal peptidase I | *lppS* |
| PAL01S_RS16290 | TIGR02204 | MsbA_rel: ABC transporter, permease/ATP-binding protein | *lppD* |
| PAL01S_RS16285 | PF14907 | Uncharacterized nucleotidyltransferase | *lppN* |
| PAL01S_RS16280 | TIGR01536 | asn_synth_AEB: asparagine synthase (glutamine-hydrolyzing) | *pbaC* |
| PAL01S_RS16275 | No match |  | *pbaALC* |
| PAL01S_RS16270 | TIGR04352 | HprK_rel_A: HprK-related kinase A | *pbaK* |
| PAL01S_RS16265 | RREFam002 | Discrete RRE protein in a lasso peptide cluster | *pbaB1* |
| PAL01S_RS16260 | PF13471 | Transglutaminase-like superfamily | *pbaB2* |
| PAL01S_RS16255 | PF14907 | Uncharacterized nucleotidyltransferase | *pbaN* |
| PAL01S_RS16250 | TIGR02203 | MsbA_lipidA: lipid A export permease/ATP-binding protein MsbA | *pbaD* |
| PAL01S_RS16245 | PF05704 | Capsular polysaccharide synthesis protein |  |
| PAL01S_RS16240 | PF00534 | Glycosyl transferases group 1 |  |
| PAL01S_RS16235 | PF00535 | Glycosyl transferase family 2 |  |
| PAL01S_RS16230 | PF04230 | Polysaccharide pyruvyl transferase |  |
| PAL01S_RS16225 | PF00534 | Glycosyl transferases group 1 |  |
| PAL01S_RS16220 | PF00534 | Glycosyl transferases group 1 |  |
| PAL01S_RS16215 | PF07470 | Glycosyl Hydrolase Family 88 |  |
| PAL01S_RS40485 | TIGR03570 | sugar O-acyltransferase, sialic acid O-acetyltransferase, NeuD family |  |
| PAL01S_RS16205 | TIGR03570 | sugar O-acyltransferase, sialic acid O-acetyltransferase, NeuD family |  |
| PAL01S_RS16200 | No match |  |  |
| PAL01S_RS16195 | TIGR01923 | O-succinylbenzoate-CoA ligase |  |
| PAL01S_RS16190 | PF01757 | Acyltransferase family |  |
| PAL01S_RS16185 | PF01757 | Acyltransferase family |  |
| PAL01S_RS16180 | PF13229 | Right-handed beta helix region |  |

**Figure S3. Schematic representation of the *P. alginolyticus* *lpp* locus (A) and annotations of the genes (B).** Arrows indicating genes are colored according to their putative functions. Genes used for the RT-PCR assay (Figure S2) are highlighted in blue.


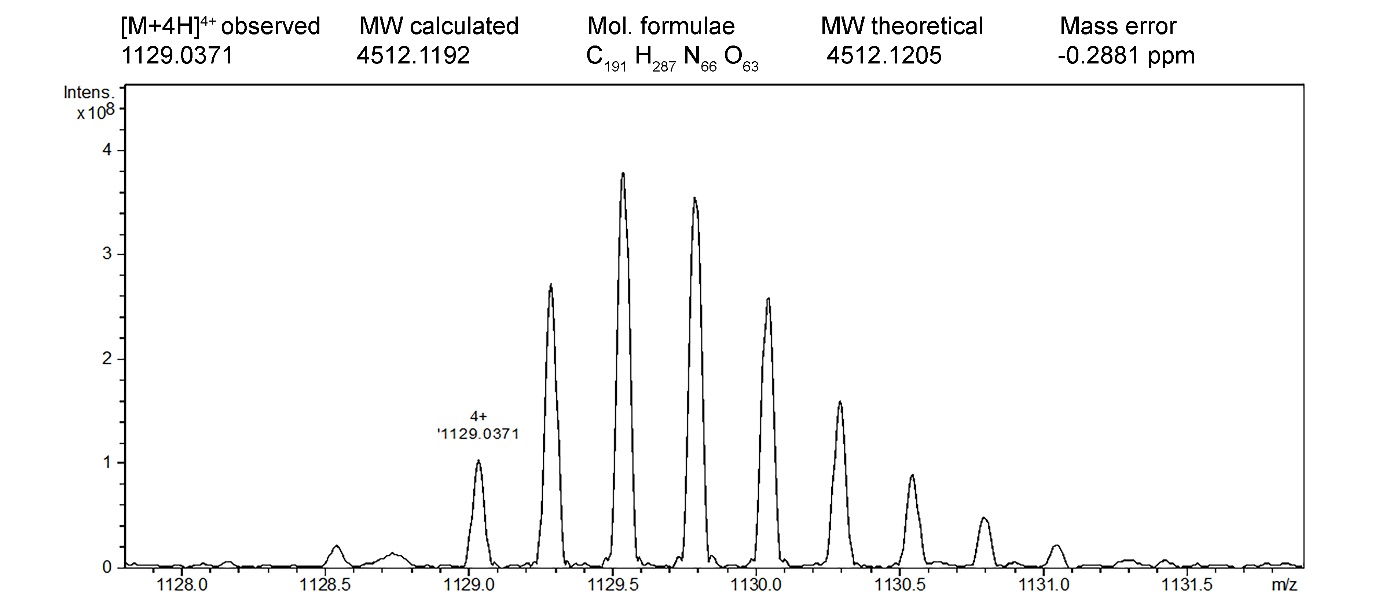


**Figure S4. High-resolution MS spectrum of the *in vivo* processed LppALC.**


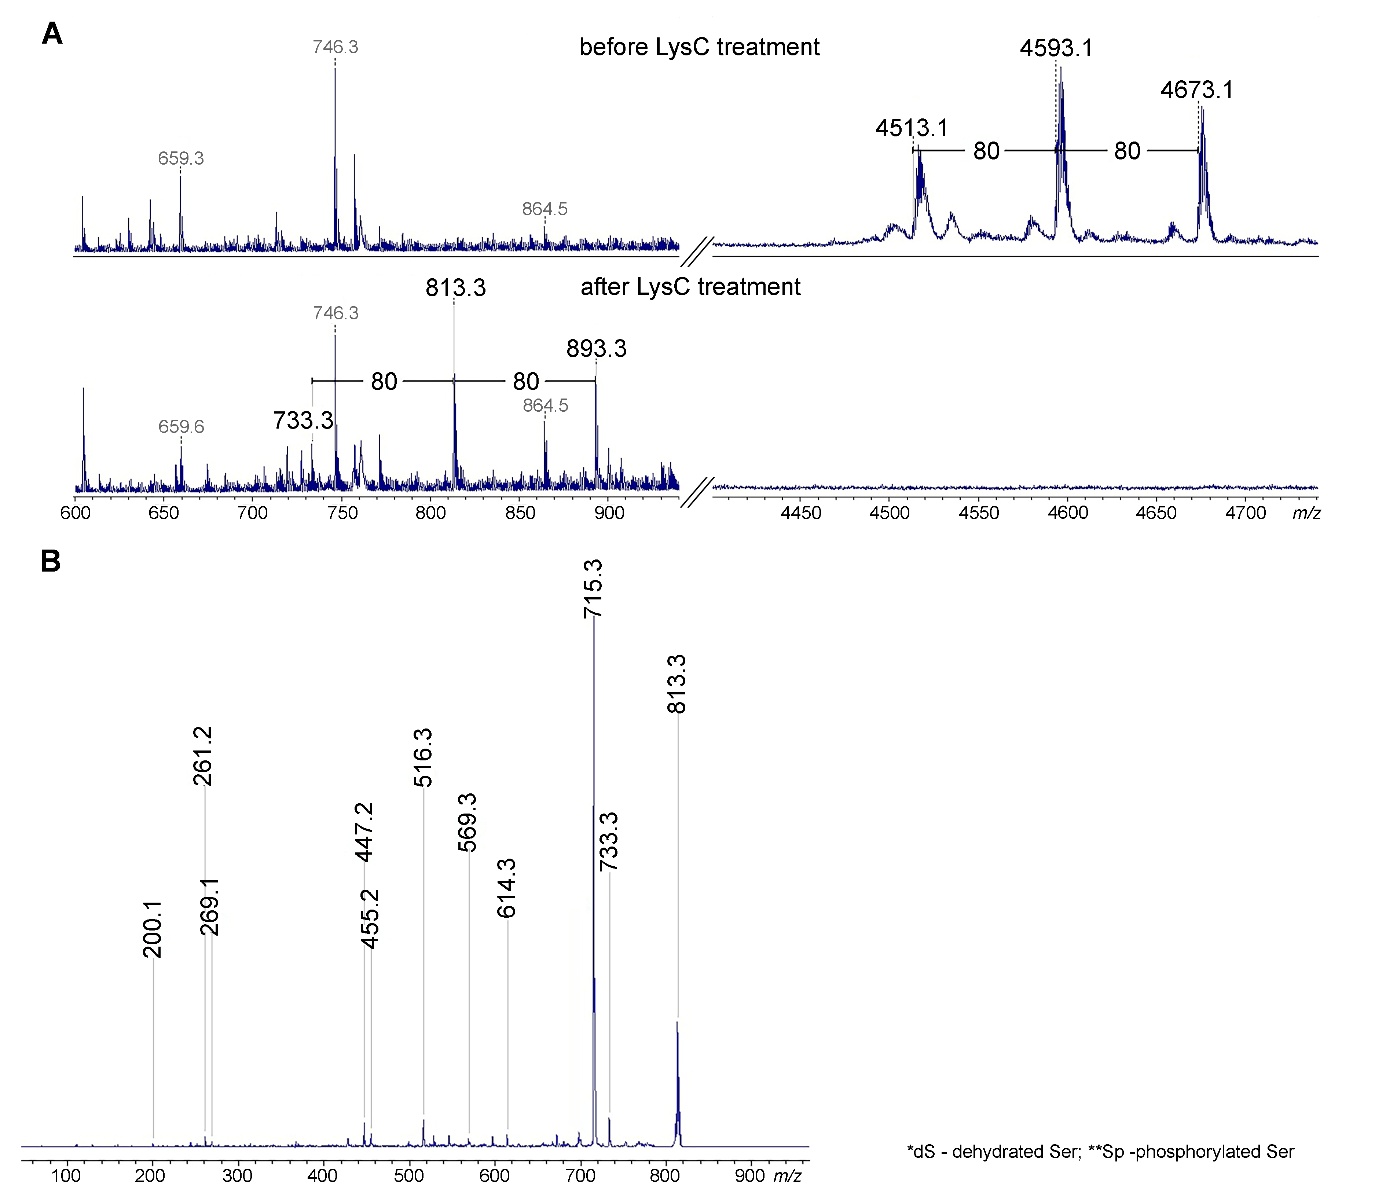

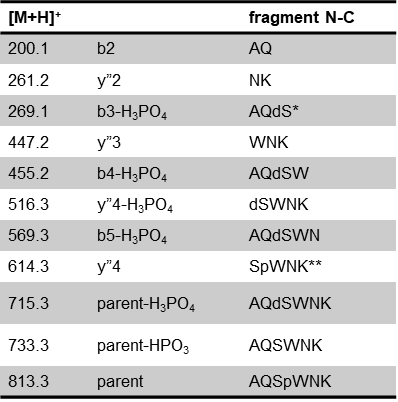


**Figure S5. Identification of the phosphorylation site in LppALC. A.** MALDI-TOF MS spectra of partially purified products of *lpp* BGC before and after treatment with LysC endoprotease recorded in reflector mode. [M+H]+ mass peaks at *m/z* 4513.1, 4593.1, and 4673.1 correspond to the unphosphorylated, mono-, and di-phosphorylated LppAC peptide. [M+H]+ mass peaks at *m/z* 733.3, 813.3, and 893.3 correspond to the same peptides with the C-terminal part removed by LysC. Spectra were recorded in reflector mode with measurement accuracy within 0.1 Da. **B.** MALDI TOF MS/MS analysis of the N-terminal fragment of the monophosphorylated LppAC peptide ([M+H]+ 813.3).


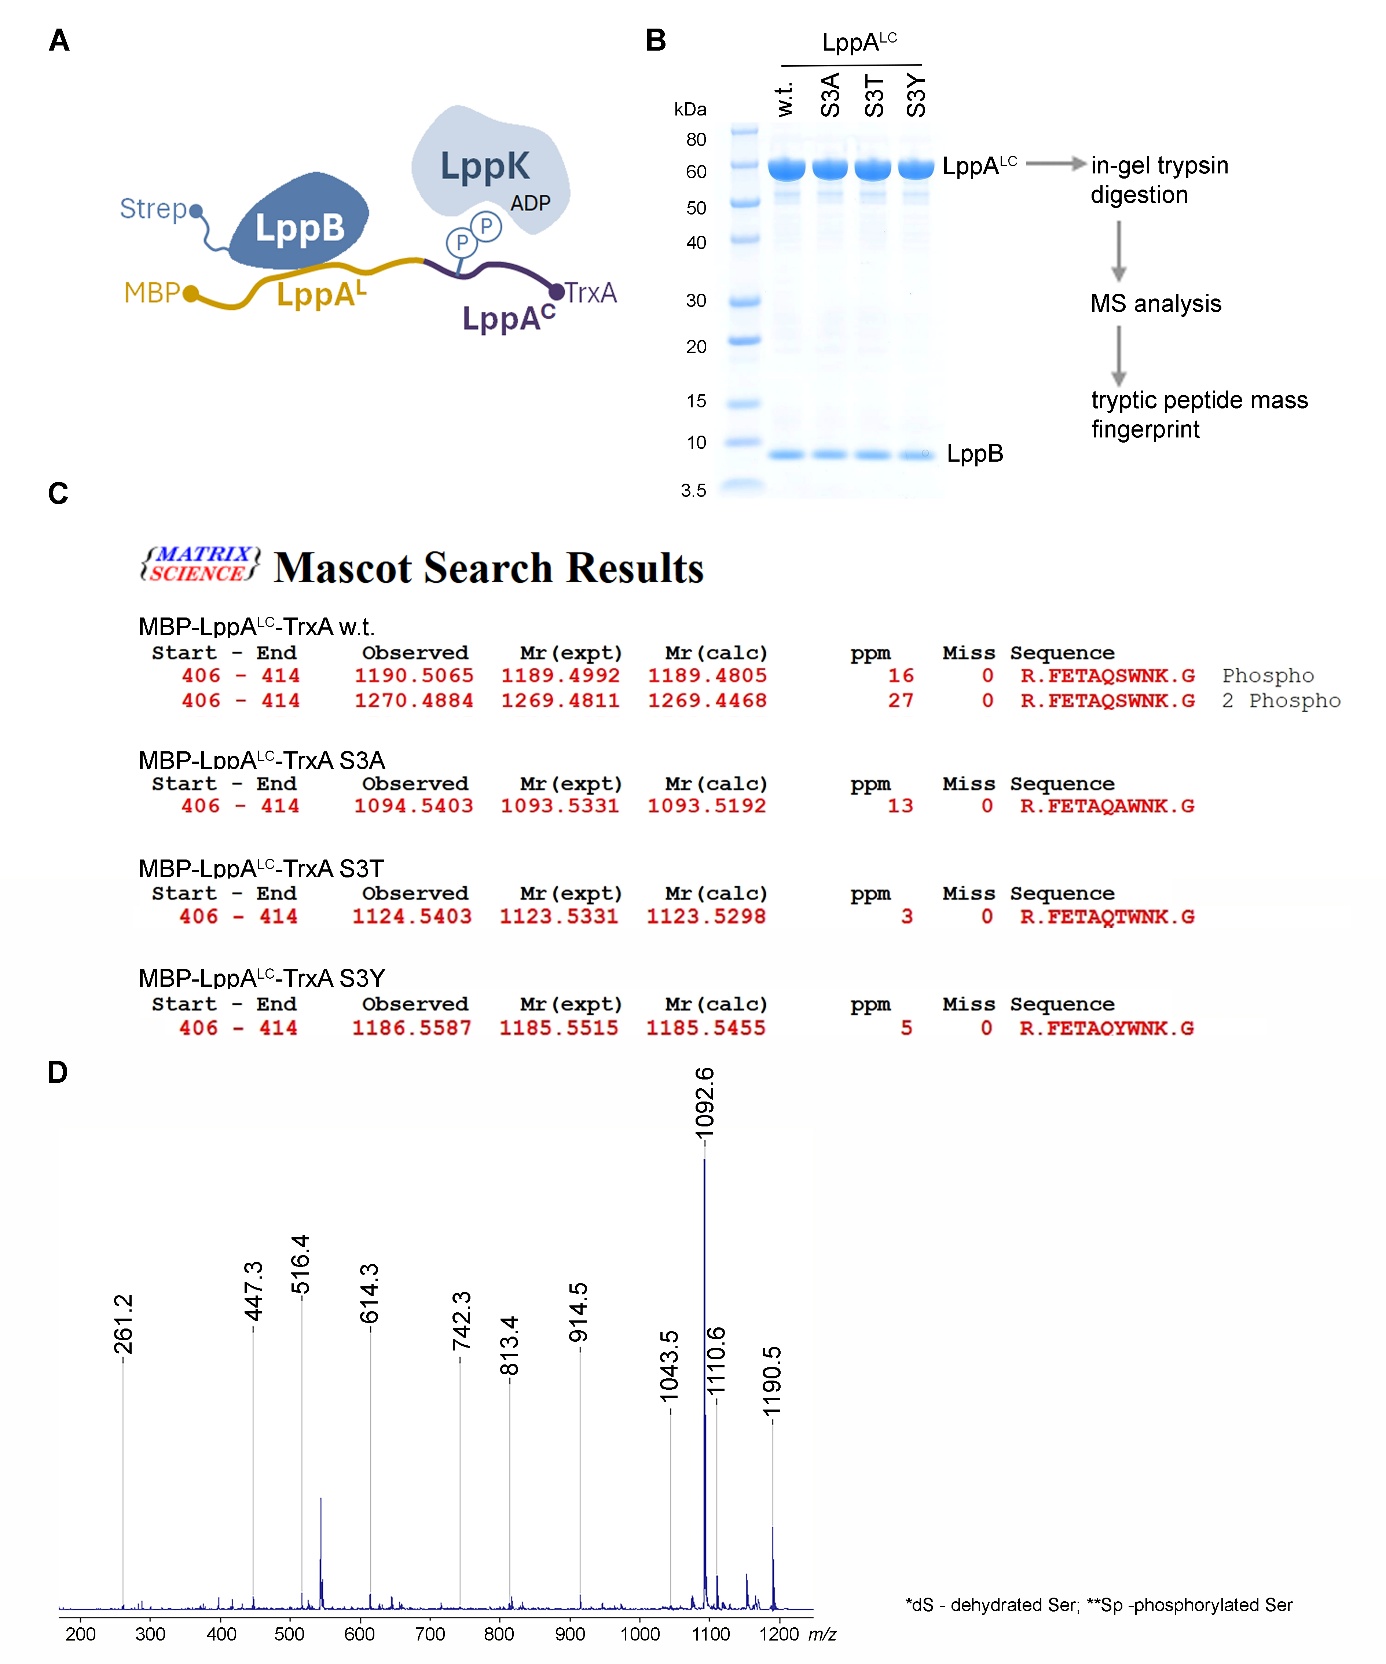

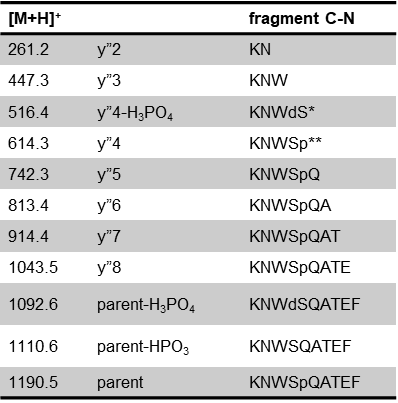


**Figure S6. LppK kinase modifies conserved Ser3 residue in LppALC.** **A**. Schematic representation of the assay. LppALC peptide fused with N-terminal MBP and C-terminal TrxA mass tag (MW 60.1 kDa) co-expressed with LppB harboring N-terminal Strep-tag and LppK. The LppB-LppALC complex was purified using affinity chromatography. **B.** SDS-PAGE analysis of the eluted fractions. Mutations in LppALC are shown at the top. Protein zones corresponding to LppALC (MBP-LppALC-TrxA fused protein, MW 61.5 kDa) were subjected to in-gel digestion with trypsin. The eluted tryptic peptides were identified using MALDI-TOF MS. **C.** Protein modifications analysis using the Mascot protein identification tool (https://www.matrixscience.com/) with phosphorylation as a variable modification. Shown are extracts of the relevant peptide hits from the Mascot Peptide Summary. **D.** MALDI TOF MS/MS analysis of the monophosphorylated tryptic peptide of LppALC ([M+H]+ 1190.5).


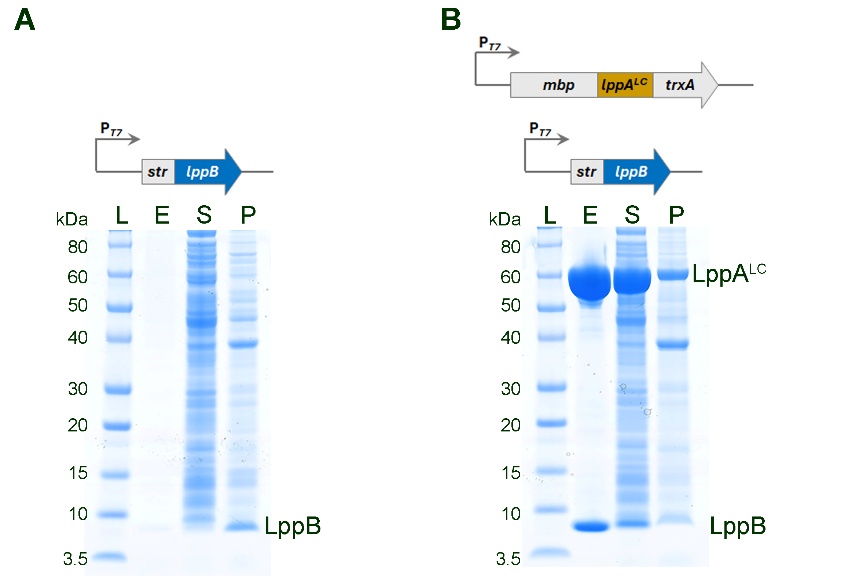


**Figure S7. Purification of LppB (A) and the LppB•LppALC complex (B).** LppALC was fused to MBP and TrxA mass tags to improve resolution on PAGE; LppB was fused with Strep tag. L, protein molecular weight ladder; E, eluate from StrepTactin resin; S, cleared cell lysate; P, insoluble fraction. LppALC, MBP-LppALC-TrxA fused protein, MW 61.5 kDa; LppB, Strep-tagged LppB, MW 11.1 kDa.


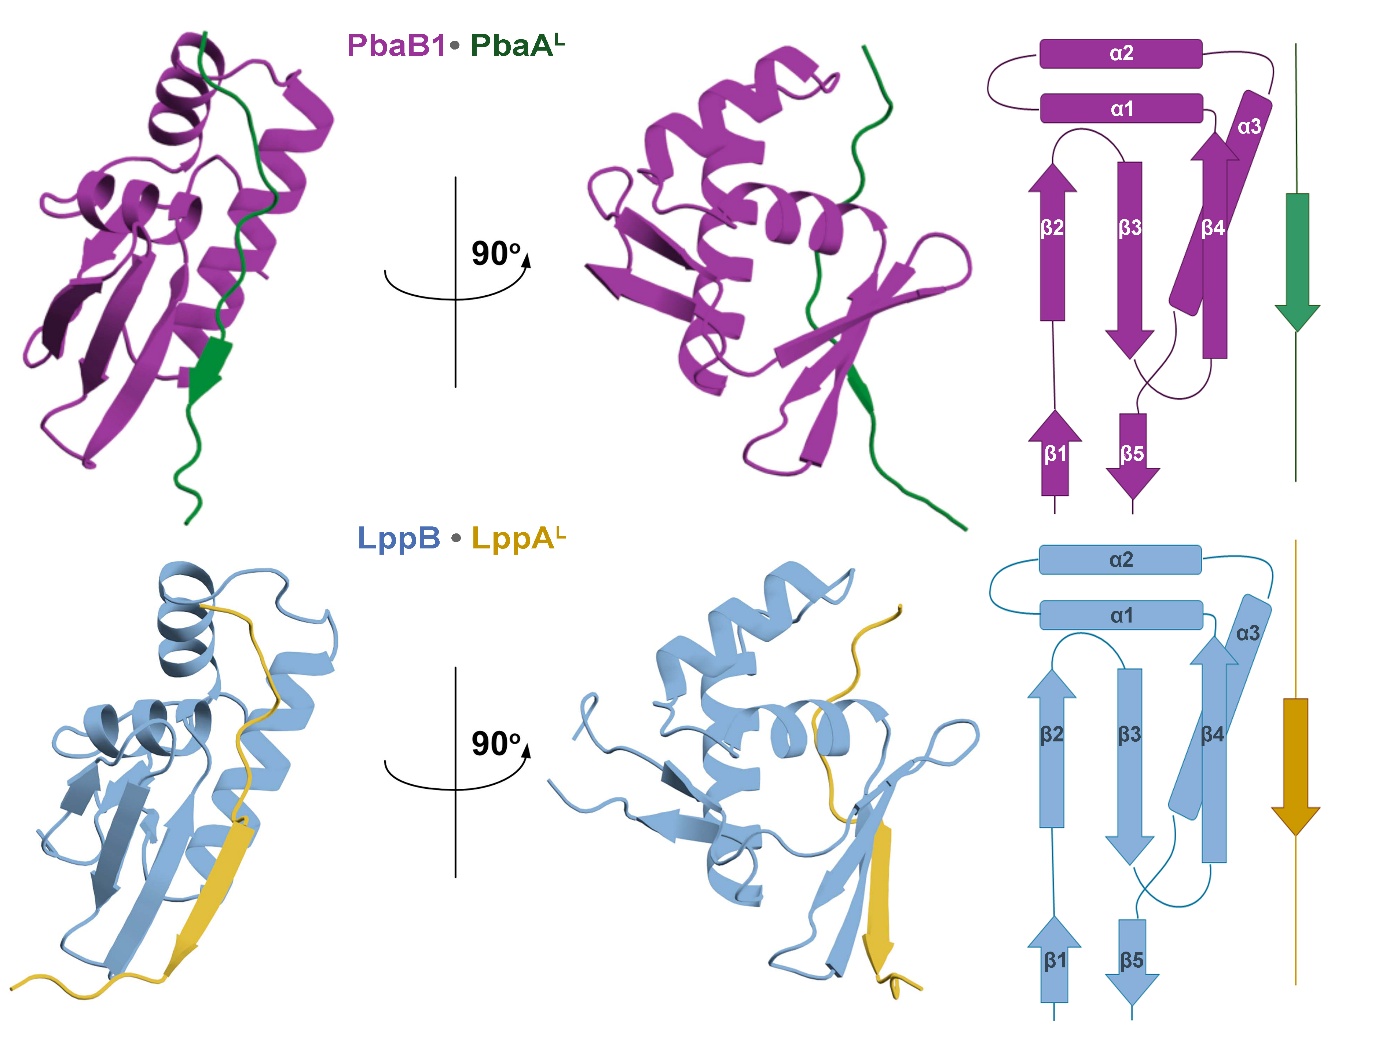


**Figure S8. Crystal structures and topology diagrams of the PbaB1•PbaAL (top) and LppB•LppAL (bottom) complexes.** RRE proteins are shown in purple (PbaB1) or light blue (LppB), while their cognate leader peptides are depicted in green (PbaAᴸ) or yellow (LppAᴸ).


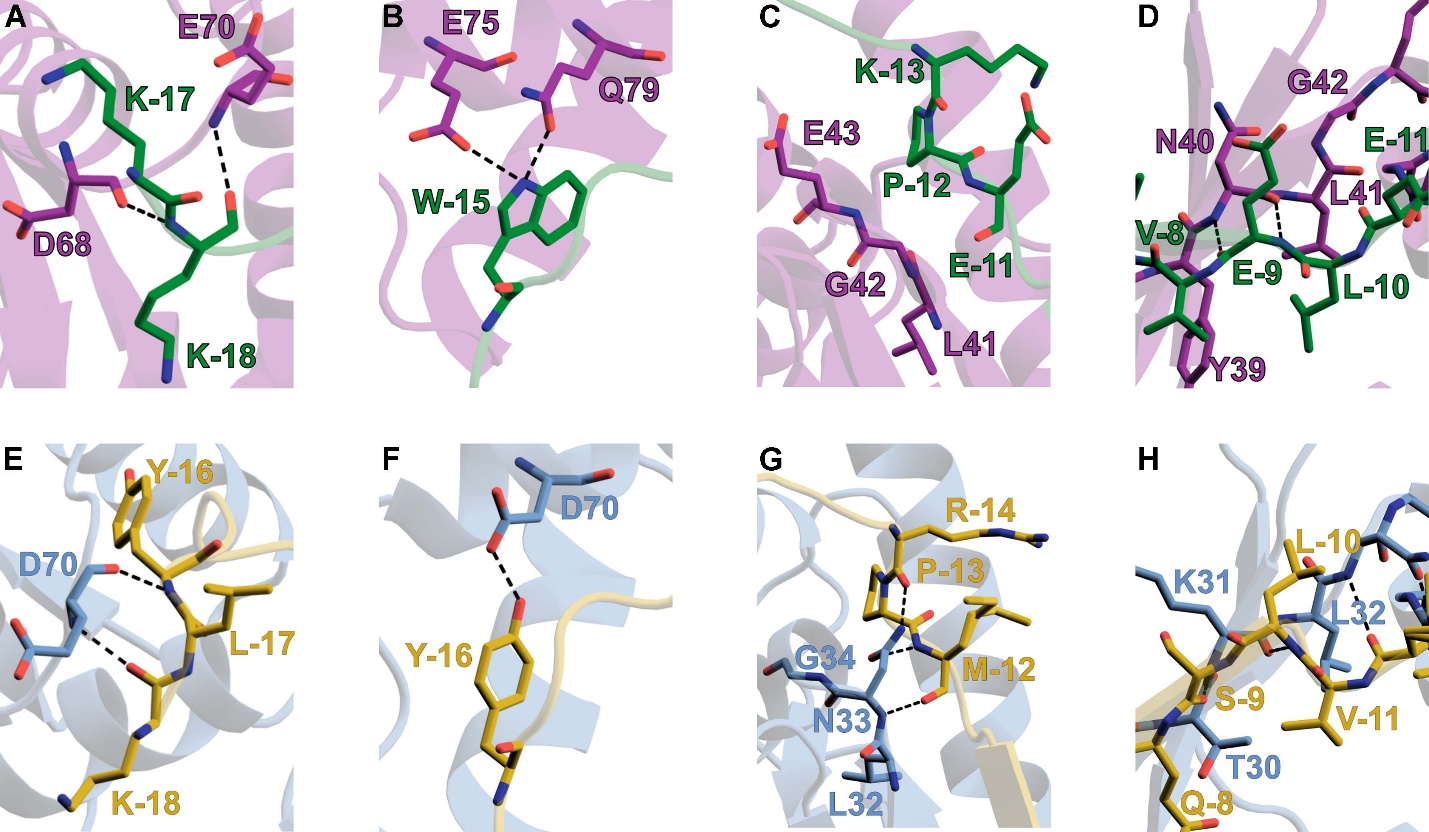


**Figure S9. Intermolecular interactions in the PbaB1•PbaAL (A-D) and LppB•LppAL (E-H) complexes.** Residues in the PbaAL and LppAL leader peptides are shown in green and yellow, respectively. PbaB1 and LppB RRE domains are in magenta and blue, respectively. Hydrogen bonds are indicated with black dashed lines. Alternative conformations are shown for LppAL M-12.


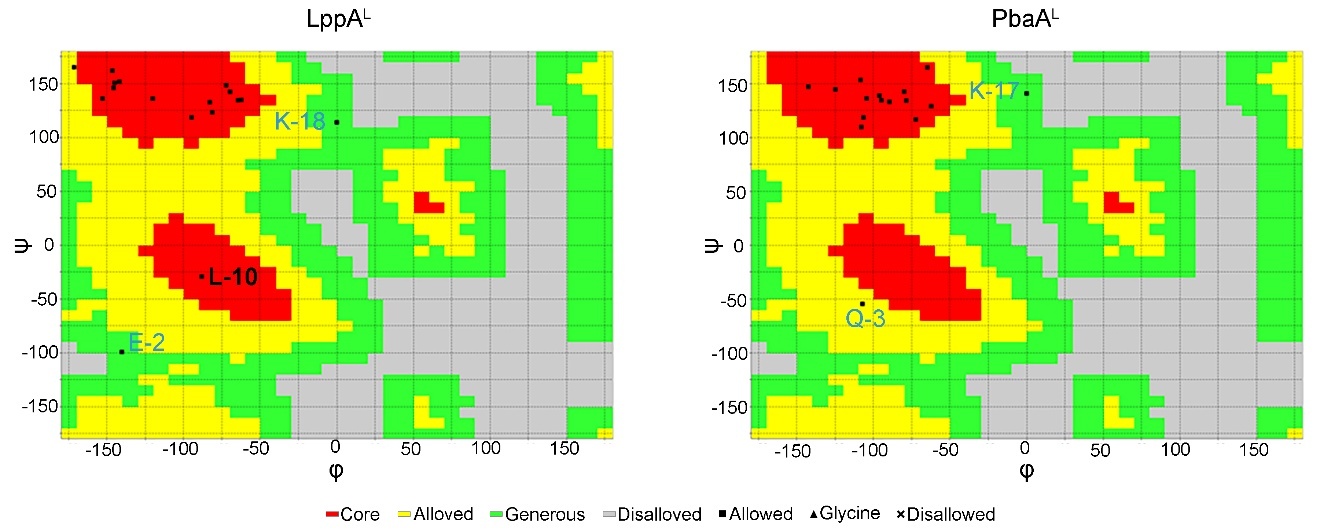


**Figure S10. Ramachandran plots of the LppAᴸ and PbaAᴸ peptides.** Coordinates for the peptides were obtained from the pdb_00009x8z (LppB•LppAL) and pdb_00009x90 (PbaB•PbaAL) structures and analyzed using the VADAR protein structure analysis server1 (http://vadar.wishartlab.com/). Residues with φ,ψ angles outside the β sheet region are indicated. The first and last residues of each leader peptide visible in the corresponding crystal structures are highlighted in blue.

| **Protein ID** | **LP** | **Phylum** | **RiPP** | **Sequence** |
| --- | --- | --- | --- | --- |
| WP_011291591.1 (FusB1) | YxxP | Actinomycetota | lasso | -------------METTGAEFRLRPEISVAQTDYGMVLLDGRSGEYWQL**N**DTAALIVQRLLDGHSPADVAQFLTSEYEVERTDAER**D**IAALVTSLKENGMALP--------------------- |
| WP_011437370.1 | YxxP | Actinomycetota | lasso | -------------------MVTLRPDVVRAPTQYGAVLLHIDNGRYWTL**N**PSGDLVLRILLDGGDTAAAVRGLCETSEVDPETARR**D**VEGLLAQLADVGLIEAEPESRWSPETEAVCDPRTQAR |
| WP_184223909.1 | YxxP | Acidobacteriota | lasso | --------MMNGSS---HLR------TIV--NQDGAAVLDTKLGSIATL**N**STGAYVWQSLERGDTLEVIIANLSREAETPHKTVER**D**VLEFVEALRAQQLLSH--------------------- |
| VJB82892.1 | YxxP | Bacillota | lasso | --------MFNKESK---------SRLKIIKQDTGAIVFDKNQGIYFQT**N**DVGVKILELLSKNESEEEIVSAISVAYSIEIDVAKQ**D**VKDFIQSLKKGGL------------------------ |
| *WP_084160254.1 (PalB1) | WxxP | Bacillota | lasso | --------MIKNQALSLQDIVVQGKGNIVSDMGGEKVMLSVQNGKYYNL**G**EIGGIIWDAIEEPIAVKQLVANLVADYEVDQSECEQ**Q**VISFLTHLMDEKLIGVENQWAI--------------- |
| *WP_258356003.1 | WxxP | Bacillota | lasso | --------MSNKQAISLKLIVSQSAGNLVSDMDGEKVMLNIDKGKYYNL**G**QLGGVIWELVEQPMAVQELVSTLCSLYQVEQSECEN**Q**VIEFLEKLMQEGLIQVKNFSS---------------- |
| WP_114069283.1 | WxxP | Bacteroidota | lasso | -----------------MAKFIRKNETISGQLNDDLVMVDIEKGSYFSL**N**SVATRIWELLENPLSPESLYDALLAEYDVTPEQCRT**E**VNEYLEKMKELGLIQVVV------------------- |
| WP_249219862.1 | YxxP | Bacteroidota | lasso | -------------MIFSGKEIKVSENSVVREMGAGIVILNLNTERFYEL**N**EVGKRFWELLSDNHDYTSILNILQAEYEVSAEQLQD**D**ITRLIGDLDEAELIVGY-------------------- |
| MCH8744259.1 | YxxP | Chloroflexota | lasso | ------MTVRYKSLELDKLTVTIPQEVLFQDLGEETVLLNVATGKYHGL**N**GVGSRIWELIQESNPMEMVLATLLDEFEVSSKTLED**D**LSQFLGVLQSKGLIEIHEADGQ--------------- |
| NMF83048.1 | YxxP | Cyanobacteriota | lasso | --------MPSQLDITSTTTLKATSNQVSSEVGEEVVILQLQSGQYFGL**D**GVGAVVWEKLQTPVTPTELEAGLINEFDVEPEVLRH**D**LQVLIQDLAAAGLVDVKGES----------------- |
| PYN02361.1 | YxxP | Euryarchaeota | lasso | --------MAPMSRPTLASRVTLNSDIAFRELDGELVILNLETGIYFGL**D**PVGARTWTLIEHHGSLGAVLEVLCSEYDAPPAVLER**D**LLELVDQLCAKGLTRVAASSA---------------- |
| WP_245259933.1 | YxxP | Pseudomonadota | lasso | --------------------MSASKDAVACEFGNGLALLDMRSNIYYSL**N**SVGAYIWELIQEPRPISEIRSAVLDRYNVDPERCKA**D**VDGLLKGLADAGLARLHDEELV--------------- |
| WP_092309227.1 | WxxP | Pseudomonadota | PQQ | --------MSFDRSK--TPRWRPGYRFQYEPAQKGHVLLYP--EGMIKL**N**DSAALIGGLIDGERNVAAIISELEVQFPGV-AELGD**D**IEQFMEVARAQHWIELG-------------------- |
| WP_409525499.1 | WxxP | Pseudomonadota | PQQ | MSASQTVDARAIDAR--AIRLNPMFRLQWEAAQDAWVLLYP--EGMVKL**N**ATAAAILNHVDGKRSLAGIVQALQNDYPQA-EGLID**D**VAAFMQEAHANNWVIYD-------------------- |
| WP_029196375.1 (LppB) | YxxP | Bacillota | LPP | -----------------MTQYLRMNDYESIQLDMEWIILNTDEYTLTKL**N**GVGGFCWSLLGAAQTVGSISEAIRKEYEFVNETVEE**D**IEAFLNDMIGRGLVQHAVS------------------  1 10 20 30 40 50 60 70 80 89 |

**Figure S11. Multiple sequence alignment of selected RRE domains from different phyla.** Residues corresponding to N33 and D70 in LppB are shown in color. RREs from paeninodin-like lasso peptide BGCs are indicated with an asterisk. The LP column denotes the conserved RRE binding motif of the corresponding peptide precursors.


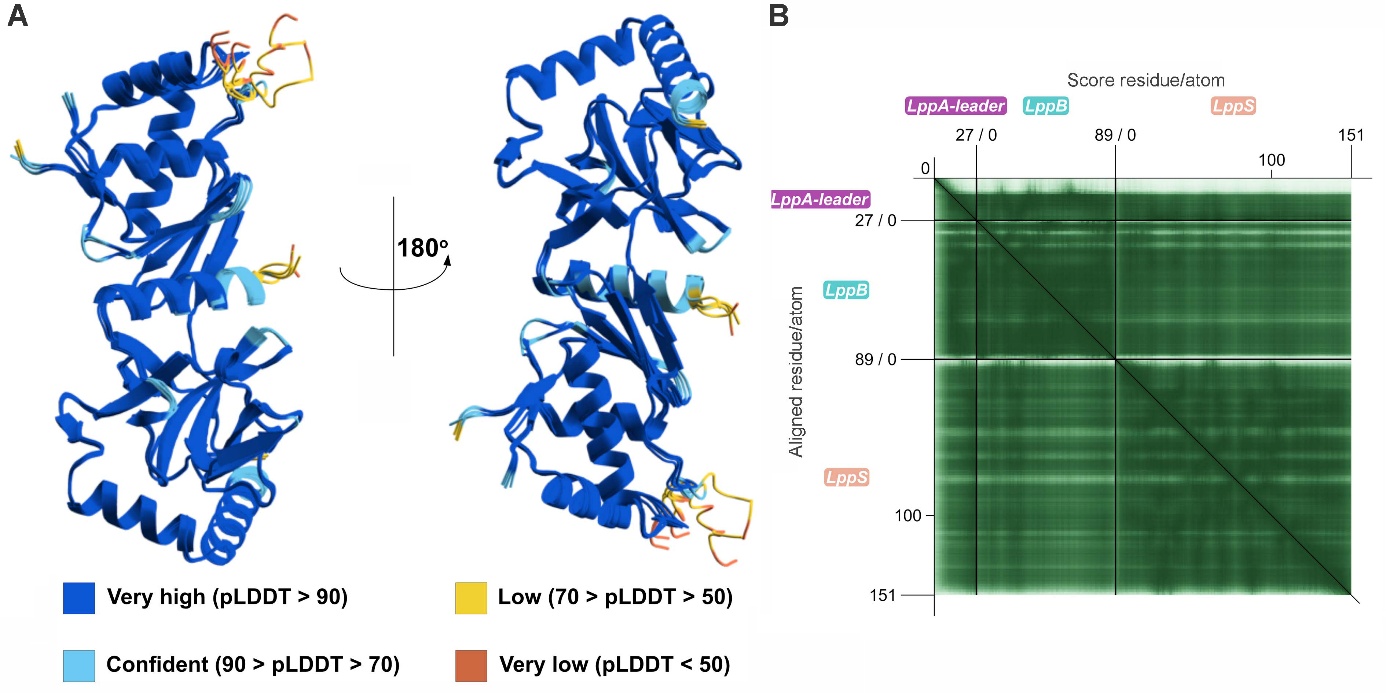


**Figure S12. AlphaFold3**2 **predicted structure of the LppS•LppB•LppAL complex**. **A.** Five generated models of the complex overlapped and colored according to the pLDDT score. **B.** Predicted Aligned Error (PAE) plot generated by PAE Viewer3 online at <https://pae-viewer.uni-goettingen.de/>.


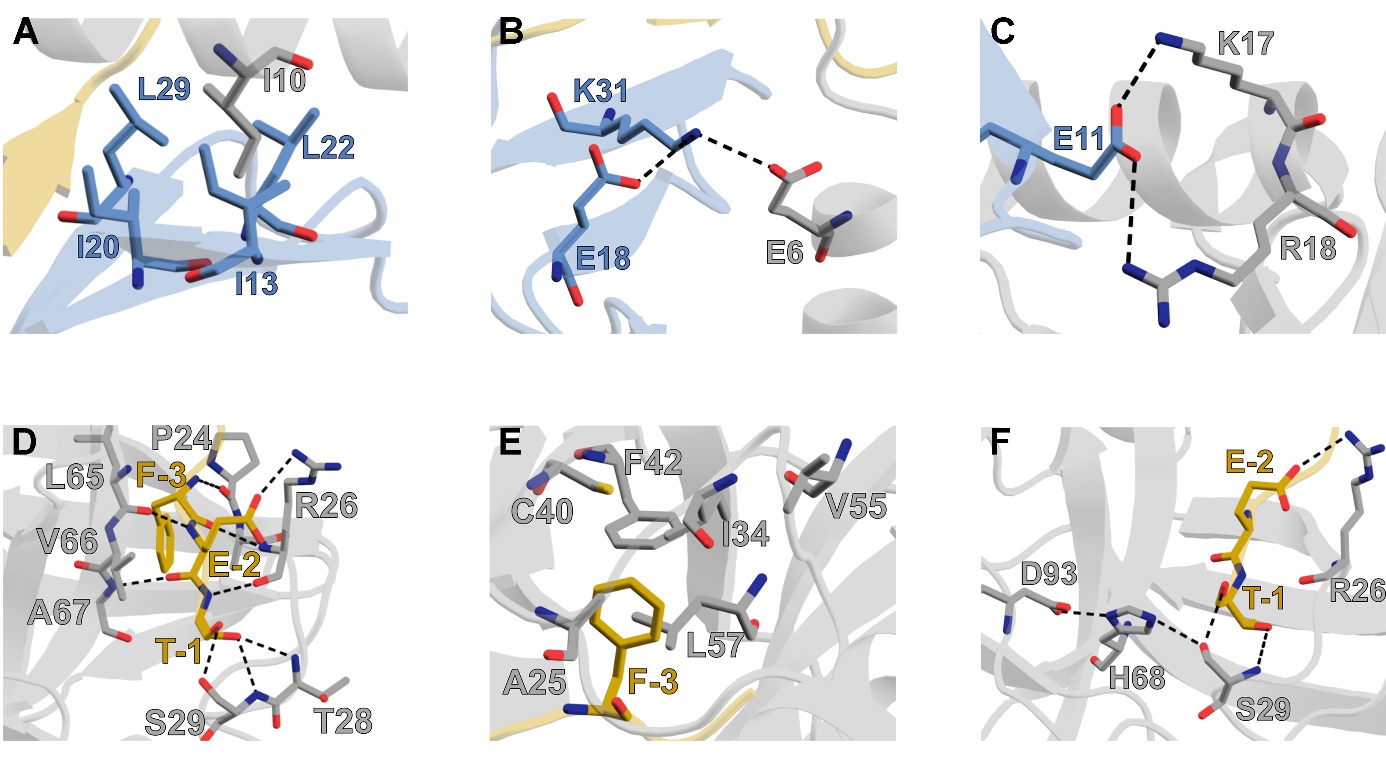


**Figure S13. Intermolecular interactions in the LppS•LppB•LppAL complex predicted by the AlphaFold3**2 **structural model.** LppAL is shown in yellow, LppB in blue, and LppS in grey. Hydrogen bonds are indicated with black dashed lines.


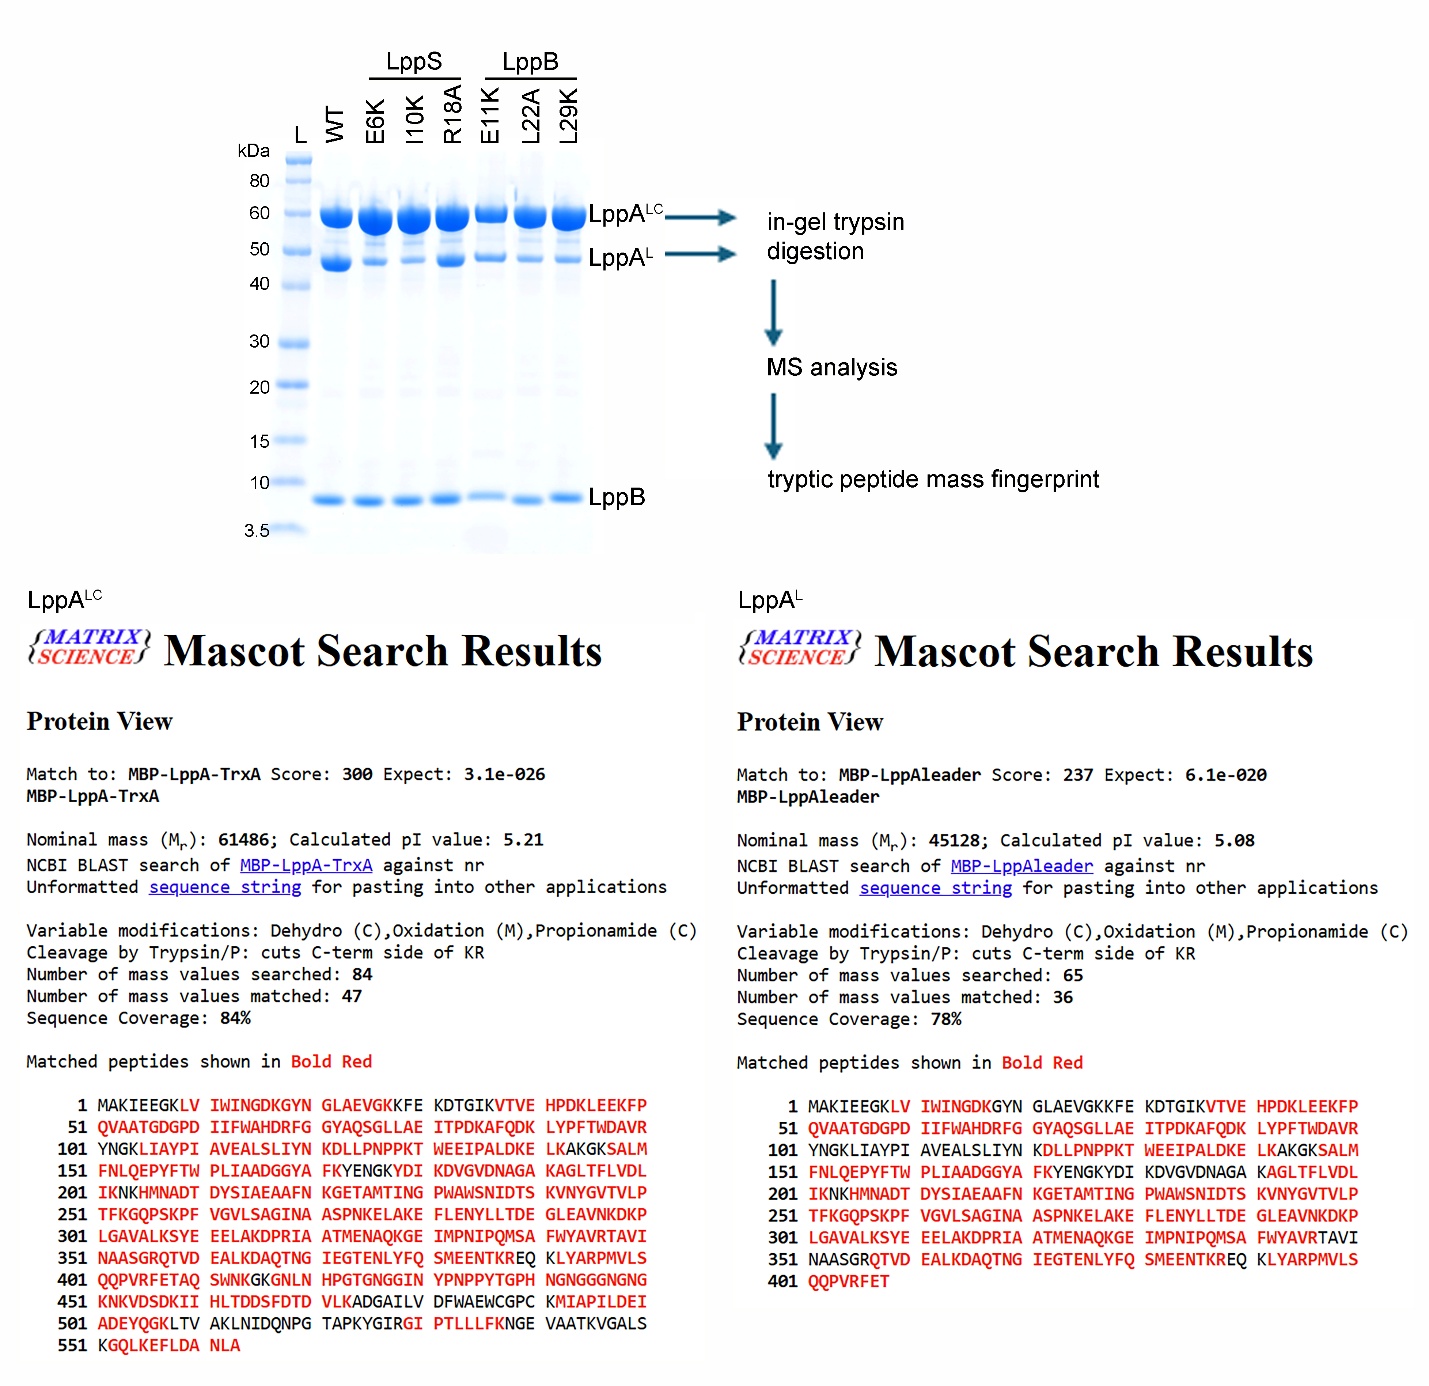


**Figure S14. Mutational analysis of the LppB–LppS interaction interface in the *in vivo* cleavage/pull-down assay.** Mutations in the corresponding proteins are listed at the top. L, protein MW ladder, LppALC, MBP-LppALC-TrxA fusion (MW 61.5 kDa), LppAL, LppAL leader peptide fused to MBP (45.1 kDa). Representative tryptic peptide fingerprint analyses confirming correct LppALC cleavage are shown in the bottom panels.


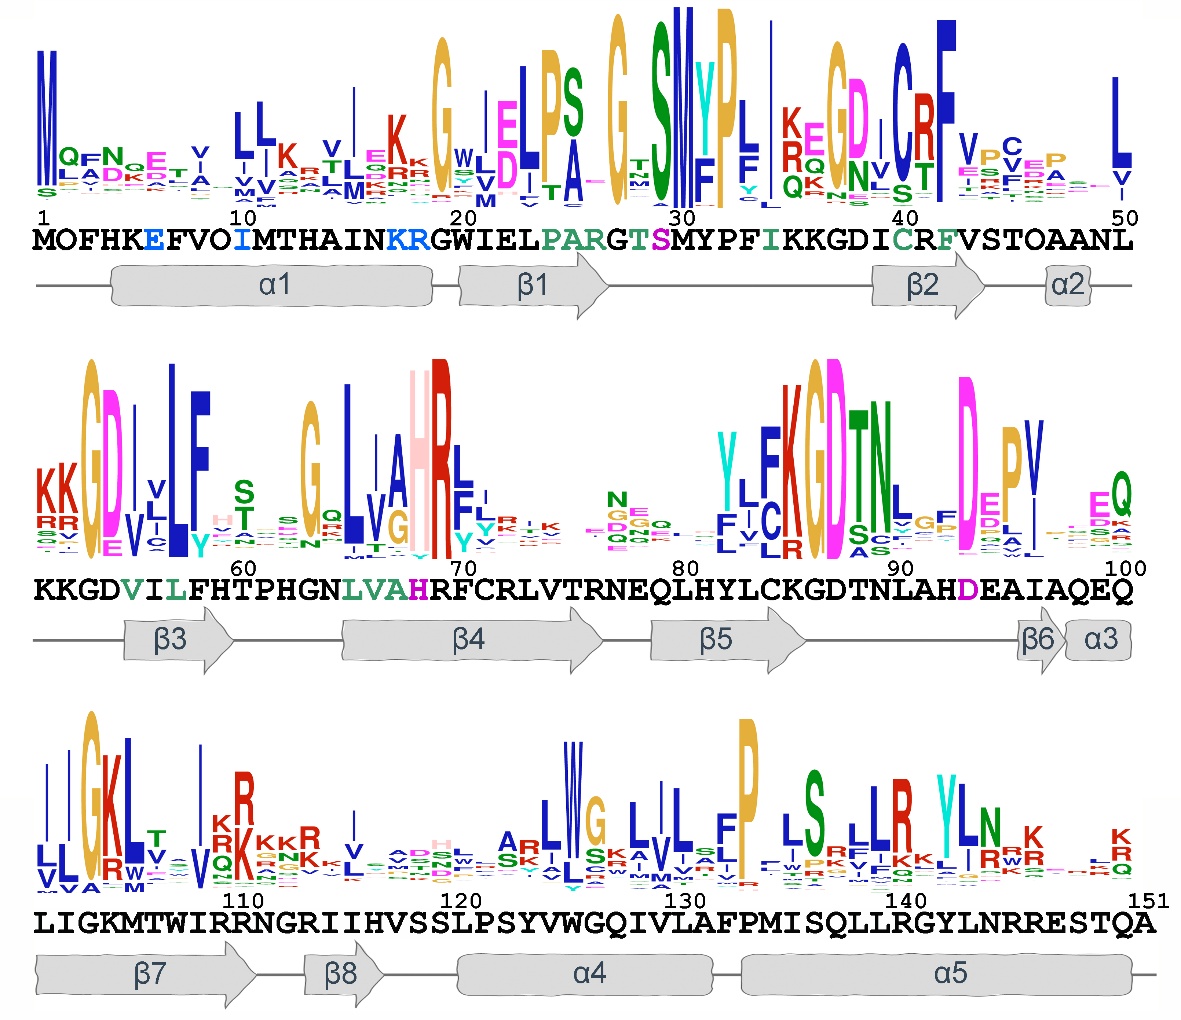


**Figure S15. The LppS secondary structure and sequence conservation.** The conservation of residues isshown as Logo4. Secondary structure elements predicted by AlphaFold3 structural model2 are depicted as arrows (β strands) and rectangles (α helices). Amino acids forming LppS/LppB and LppS/LppALC intermolecular interfaces are shown in blue and green, respectively. Catalytic residues are in magenta.

**Supplementary References**

1. Willard, L. *et al.* VADAR: a web server for quantitative evaluation of protein structure quality. *Nucleic Acids Res* **31**, 3316–9 (2003).

2. Abramson, J. *et al.* Accurate structure prediction of biomolecular interactions with AlphaFold 3. *Nature* **630**, 493–500 (2024).

3. Elfmann, C. & Stülke, J. PAE viewer: a webserver for the interactive visualization of the predicted aligned error for multimer structure predictions and crosslinks. *Nucleic Acids Res* **51**, W404–W410 (2023).

4. Crooks, G. E., Hon, G., Chandonia, J.-M. & Brenner, S. E. WebLogo: A Sequence Logo Generator. *Genome Res* **14**, 1188–1190 (2004).
